# Supplementary material for: ZnBr2-catalyzed directC-glycosylation of glycosyl acetates with terminal alkynes
Source: Royal Society of Chemistry journal article supplement (doi:10.1039/c8qo00380g), 2018-01-01

**Supporting information**

***ZnBr<sub>2</sub>-Catalyzed Direct C-Glycosylation of  
Glycosyl Acetates with Terminal Alkynes***

---

Haiqing He<sup>†,‡</sup>, Hong-Bo Qin<sup>\*,†</sup>

<sup>†</sup>State Key Laboratory of Phytochemistry and Plant Resources in West China, Kunming Institute of Botany, Chinese Academy of Sciences, and Yunnan Key Laboratory of Natural Medicinal Chemistry, Kunming 650201, Yunnan, P. R. China.

E-mail: [qinhongbo@mail.kib.ac.cn](mailto:qinhongbo@mail.kib.ac.cn)

<sup>‡</sup>University of Chinese Academy of Sciences, Beijing 100049, P. R. China.

---

## Table of Contents

|                                                                                                                    |    |
|--------------------------------------------------------------------------------------------------------------------|----|
| 1 General Information .....                                                                                        | 3  |
| 2 Optimization Studies .....                                                                                       | 4  |
| Table S1 Screening reaction conditions .....                                                                       | 4  |
| 3 Experimental Procedures.....                                                                                     | 5  |
| 3.1. Synthesis of glycosyl acetate.....                                                                            | 5  |
| 3.1.1 Synthesis of glucosyl acetate <b>1</b> .....                                                                 | 5  |
| 3.1.2 Synthesis of galactosyl acetate <b>3</b> (General procedure).....                                            | 6  |
| 3.1.3 Synthesis of mannosyl acetate <b>4</b> (According to the general procedure of preparation of <b>3</b> )..... | 8  |
| 3.1.4 Synthesis of fucosyl acetate <b>5</b> (According to the general procedure of preparation of <b>3</b> ).....  | 10 |
| 3.1.5 Synthesis of xylosyl acetate <b>6</b> (According to the general procedure of preparation of <b>3</b> ).....  | 11 |
| 3.1.6 Synthesis of ribofuranosyl acetate <b>7</b> .....                                                            | 12 |
| 3.1.6 Synthesis of furanosyl acetate <b>8</b> .....                                                                | 13 |
| 3.2. Prepare of C-glycosides.....                                                                                  | 13 |
| 3.3 Formal Synthesis of (+)-Varitriol.....                                                                         | 32 |
| 4 References .....                                                                                                 | 34 |
| 5 NMR Spectra of Products.....                                                                                     | 36 |

## 1 General Information

All reagents and chemicals were purchased from commercial suppliers and used without further purification unless otherwise noted. Tetrahydrofuran (THF), Et<sub>2</sub>O and 1,4-dioxane were distilled over sodium/benzophenone ketyl. Dichloromethane (DCM) and toluene were distilled over calcium hydride. Silica gel (200 - 300 mesh, Qingdao Marine Chemical Ltd., China), petroleum ether and ethyl acetate were used for product purification by flash column chromatography. Reactions were monitored by thin-layer chromatography (TLC) carried out on 0.2±0.03 mm using UV light as a visualizing agent and sulfuric acid in ethanol as a developing agent.

The <sup>1</sup>H and the <sup>13</sup>C NMR spectroscopic data were recorded on a Bruker Ascend 400 (400 MHz) and 800 (800MHz) spectrometers. Unless otherwise specified, the <sup>1</sup>H and the <sup>13</sup>C NMR spectroscopic data were recorded on a Bruker Ascend 400 (400 MHz) spectrometer (<sup>1</sup>H and <sup>13</sup>C NMR at 400 and 100 MHz, respectively). All compounds were dissolved in CDCl<sub>3</sub>. Chemical shifts (δ) for <sup>1</sup>H and <sup>13</sup>C NMR spectra are given in ppm relative to TMS, The residual solvent signals were used as references for <sup>1</sup>H and <sup>13</sup>C NMR spectra and the chemical shifts converted to the TMS scale (CDCl<sub>3</sub>: 7.26 ppm for <sup>1</sup>H NMR and 77.16 ppm for <sup>13</sup>C NMR). Data for <sup>1</sup>H are reported as follows: chemical shift (δ ppm), multiplicity (s = singlet, d = doublet, t = triplet, q = quartet, m =multiplet), coupling constant in Hz, and integration. HRMS determinations were recorded on a mass spectrometer (SHIMADZU UPLC-IT-TOF) with ESI ionization.

## 2 Optimization Studies

**Table S1 Screening reaction conditions**

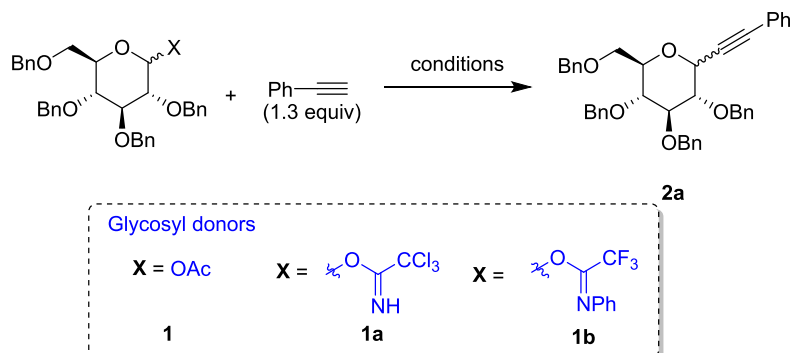

| entry | donors <sup>a</sup> | conditions (equiv)                                                                                      | results              |
|-------|---------------------|---------------------------------------------------------------------------------------------------------|----------------------|
| 1     | <b>1a</b>           | <sup>1</sup> Ph <sub>3</sub> PAuCl (0.3), AgOTf (0.2), DCE, 80 °C, 6h                                   | complex <sup>b</sup> |
| 2     | <b>1a</b>           | <sup>2</sup> CuI (0.2), TMSOTf (1.2), DIPEA (1.3), toluene, reflux, 24h                                 | NR <sup>c</sup>      |
| 3     | <b>1a</b>           | <sup>3</sup> Cu(OTf) <sub>2</sub> (0.1), ascorbic acid (0.1), CH <sub>3</sub> CN, rt, 3h                | complex <sup>b</sup> |
| 4     | <b>1a</b>           | <sup>4</sup> In(OTf) <sub>3</sub> (0.2), DCE, 60 °C, 24h                                                | NR <sup>c</sup>      |
| 5     | <b>1a</b>           | <sup>5</sup> ZnBr <sub>2</sub> (0.2), BF <sub>3</sub> Et <sub>2</sub> O (1.3), DIPEA (1.5), DCM, rt, 5h | trace <sup>b</sup>   |
| 6     | <b>1b</b>           | Ph <sub>3</sub> PAuCl (0.3), AgOTf (0.2), DCE, 80 °C, 6h                                                | complex <sup>b</sup> |
| 7     | <b>1b</b>           | Cu(OTf) <sub>2</sub> (0.1), ascorbic acid(0.1),CH <sub>3</sub> CN,rt,24h                                | complex <sup>b</sup> |
| 8     | <b>1b</b>           | In(OTf) <sub>3</sub> (0.2), DCE, 60 °C, 24h                                                             | NR <sup>c</sup>      |
| 9     | <b>1b</b>           | ZnBr <sub>2</sub> (0.2), BF <sub>3</sub> Et <sub>2</sub> O (1.3), DIPEA (1.5), DCM, rt, 3h              | trace <sup>b</sup>   |
| 10    | <b>1</b>            | Ph <sub>3</sub> PAuCl (0.3), AgOTf (0.2), DCE, 80 °C, 24h                                               | NR <sup>c</sup>      |
| 11    | <b>1</b>            | CuI (0.2), TMSOTf (1.2), DIPEA (1.3), DCM, rt, 24h                                                      | complex <sup>b</sup> |
| 12    | <b>1</b>            | <sup>6</sup> Cu(OTf) <sub>2</sub> (0.2), DCM, rt, 24h                                                   | NR <sup>c</sup>      |
| 13    | <b>1</b>            | Cu(OTf) <sub>2</sub> (0.1), ascorbic acid (0.1),CH <sub>3</sub> CN,rt,24h                               | NR <sup>c</sup>      |
| 14    | <b>1</b>            | In(OTf) <sub>3</sub> (0.2), DCE, 60 °C, 24h                                                             | NR <sup>c</sup>      |
| 15    | <b>1</b>            | <sup>7</sup> TMSOTf (0.5), DCM, rt, 24h                                                                 | NR <sup>d</sup>      |
| 16    | <b>1</b>            | TMSOTf (1.3),DIPEA (1.5), DCM, rt, 24h                                                                  | NR <sup>b</sup>      |
| 17    | <b>1</b>            | ZnBr <sub>2</sub> (0.2), BF <sub>3</sub> Et <sub>2</sub> O (1.3), DIPEA (1.5), DCM, rt, 20h             | 16% <sup>e</sup>     |
| 18    | <b>1</b>            | ZnBr <sub>2</sub> (0.2), BF <sub>3</sub> Et <sub>2</sub> O (3.0), DIPEA (1.5), DCM, rt, <b>48h</b>      | 15% <sup>e</sup>     |
| 19    | <b>1</b>            | ZnBr <sub>2</sub> (0.5), BF <sub>3</sub> Et <sub>2</sub> O (1.3), DIPEA (1.5), DCM, rt, <b>48h</b>      | 18% <sup>e</sup>     |
| 20    | <b>1</b>            | ZnBr <sub>2</sub> (0.2), DIPEA (1.5), DCM, rt, 24h                                                      | NR <sup>c</sup>      |
| 21    | <b>1</b>            | ZnBr <sub>2</sub> (1.0), DIPEA (1.5), DCM, rt, 24h                                                      | NR <sup>c</sup>      |

<sup>a</sup> **1,1a,1b** (0.2 mmol). <sup>b</sup> The donor was partially hydrolyzed. <sup>c</sup>No reaction. <sup>d</sup>The donor was completely hydrolyzed. <sup>e</sup>Isolated yield. DCE = 1,2-dichloroethane, DIPEA = *i*-Pr<sub>2</sub>NEt.

## 3 Experimental Procedures

### 3.1. Synthesis of glycosyl acetate

#### 3.1.1 Synthesis of glucosyl acetate 1

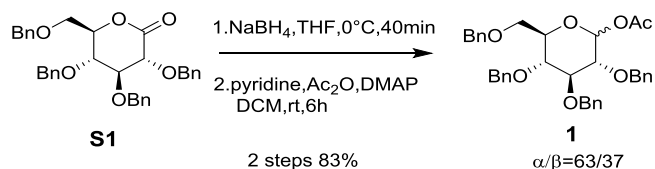

To a solution of **S1** (3g, 5.58 mmol) in THF (20 ml) was slowly added NaBH<sub>4</sub> (318 mg, 8.37 mmol), and MeOH (1 ml) at 0 °C, and the mixture was stirred vigorously for 40 min under Argon atmosphere. Then the reaction was quenched with H<sub>2</sub>O, extracted with DCM. The combined organic phase was washed with brine, dried with Na<sub>2</sub>SO<sub>4</sub>, and evaporated *in vacuo* to afford crude product, which was used in the next step without further purification. To a solution of the crude product in DCM (28 ml) was added Ac<sub>2</sub>O (1.6 ml, 16.7 mmol), pyridine (3 ml) and 4-dimethylaminopyridine (66mg, 0.54 mmol), and the mixture was stirred vigorously at rt for 6 h under Argon atmosphere. Then the solution was concentrated *in vacuo* and purification by flash chromatography (EtOAc/Petroleum ether =1/5) afforded **1** (2.7 g, 83%) as a colorless oil. R<sub>f</sub> = 0.4 (Petroleum ether /EtOAc 6:1).

**1** ( $\alpha:\beta = 63:37$ ): <sup>1</sup>H NMR (400 MHz, CDCl<sub>3</sub>)  $\delta$  7.29 (ddtd,  $J = 10.0, 7.1, 4.9, 2.7$  Hz, 28H), 7.13 (dd,  $J = 6.4, 2.6$  Hz, 4H), 6.36 (d,  $J = 3.5$  Hz, 1H), 5.61 (d,  $J = 8.1$  Hz, 1H), 4.96 (d,  $J = 10.9$  Hz, 1H), 4.91 – 4.71 (m, 6H), 4.71 – 4.56 (m, 4H), 4.56 – 4.42 (m, 4H), 3.95 (t,  $J = 9.3$  Hz, 1H), 3.89 – 3.81 (m, 1H), 3.78 – 3.53 (m, 9H), 2.12 (s, 3H), 2.04 (s, 2H). <sup>13</sup>C NMR (100 MHz, CDCl<sub>3</sub>)  $\delta$  169.48, 169.33, 138.67, 138.40, 138.13, 138.04, 137.92, 137.83, 137.63, 128.52, 128.47, 128.45, 128.40, 128.17, 128.02, 128.00, 127.92, 127.90, 127.89, 127.86, 127.84, 127.82, 127.79, 127.75, 127.74, 127.69, 94.07, 90.03, 84.84, 81.70, 81.09, 78.90, 77.24, 76.96, 75.78, 75.73, 75.51, 75.34, 75.08, 75.06, 73.59, 73.55, 73.24, 72.85, 68.12, 21.17, 21.13. HRMS (ESI):  $m/z$  calcd for C<sub>36</sub>H<sub>38</sub>O<sub>7</sub>Na ([M + Na]<sup>+</sup>): 605.2510, found: 605.2513.

### 3.1.2 Synthesis of galactosyl acetate **3** (General procedure)

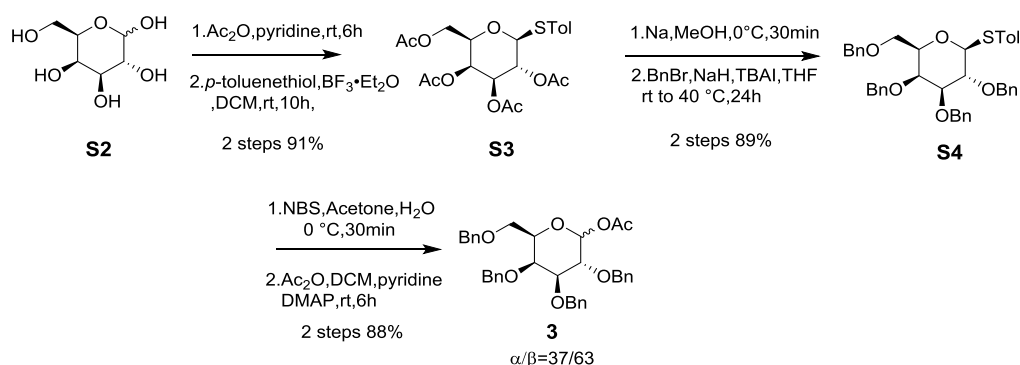

**S3**: D-Galactose (1 g, 5.55 mmol) was dissolved in Ac<sub>2</sub>O/ pyridine (5 ml/10 ml). The mixture was stirred at room temperature for 6h, then concentrated *in vacuo* to afford a yellow liquid (2.02 g, 100%), which was used in the next step without further purification. To a solution of this crude product, *p*-toluenethiol (1.5 g, 12.16 mmol) in DCM (30 ml) was added BF<sub>3</sub>·Et<sub>2</sub>O (1.57 ml, 12.16 mmol) at 0 °C under argon atmosphere. The temperature was gradually raised to room temperature over 1 h, and the mixture was stirred overnight. Then it was quenched with saturated aqueous NaHCO<sub>3</sub>, extracted with DCM, and washed with brine. The organic phase was dried by Na<sub>2</sub>SO<sub>4</sub> and concentrated *in vacuo*. Purification by flash chromatography (EtOAc/Petroleum ether =1 /4) afforded **S3** (2.3 g, 91%) as a white solid. mp 108–113 °C, R<sub>f</sub> = 0.38 (Petroleum ether /EtOAc 2:1).

**<sup>1</sup>H NMR** (400 MHz, CDCl<sub>3</sub>) δ 7.45 – 7.36 (m, 2H), 7.13 (d, J = 7.9 Hz, 2H), 5.45 – 5.36 (m, 1H), 5.22 (t, J = 9.9 Hz, 1H), 5.04 (dd, J = 9.9, 3.4 Hz, 1H), 4.66 (d, J = 10.0 Hz, 1H), 4.23 – 4.04 (m, 2H), 3.98 – 3.84 (m, 1H), 2.35 (s, 3H), 2.11 (d, J = 6.3 Hz, 6H), 2.04 (s, 3H), 1.97 (s, 3H). **<sup>13</sup>C NMR** (100 MHz, CDCl<sub>3</sub>) δ 170.34, 170.17, 170.03, 169.40, 138.42, 133.11, 129.62, 128.61, 86.90, 77.42, 77.10, 76.78, 74.33, 72.01, 67.27, 67.21, 61.58, 21.15, 20.86, 20.67, 20.63, 20.58. **HRMS** (ESI): m/z calcd for C<sub>21</sub>H<sub>26</sub>O<sub>9</sub>SNa ([M + Na]<sup>+</sup>): 477.1190, found: 477.1190.

**S4**: To a solution of **S3** (1 g, 2.2 mmol) in MeOH (10 ml) was added Na (10 mg, 0.44 mmol) at 0 °C under argon atmosphere. Then the mixture was stirred 30min and neutralized with HCl. The solvent was concentrated *in vacuo* to afford crude product as

a yellow solid. This compound was suitable for the next step without purification. The crude product was dissolved in anhydrous THF (10 mL) and cooled to 0 °C. NaH (528 mg, 13.2 mmol, 60% in mineral oil) was added and the solution was then stirred at rt for 1 h. Benzyl bromide (1.57 mL, 119.7 mmol) and tetrabutylammonium iodide (203 mg, 8.55 mmol) were added and the solution was then stirred at 35 °C for 23 h. The reaction was quenched with MeOH and the solution concentrated *in vacuo*. The obtained residue was dissolved in DCM and washed with H<sub>2</sub>O. The aqueous phase was washed with DCM, the organic layers were combined, washed with brine, dried over Na<sub>2</sub>SO<sub>4</sub> and concentrated under reduced pressure. The residue was purified by column chromatography (hexane/EtOAc 12:1) to afford **S4** as a white solid (1.26 g, 89%). mp 90–94 °C, R<sub>f</sub> = 0.7 (Petroleum ether /EtOAc 6:1). <sup>1</sup>H NMR (400 MHz, CDCl<sub>3</sub>) δ 7.46 (d, J = 7.9 Hz, 2H), 7.42 – 7.24 (m, 18H), 6.98 (d, J = 7.9 Hz, 2H), 4.96 (d, J = 11.5 Hz, 1H), 4.82 – 4.66 (m, 4H), 4.59 (dd, J = 10.6, 3.9 Hz, 2H), 4.49 – 4.34 (m, 2H), 3.97 (d, J = 2.7 Hz, 1H), 3.89 (t, J = 9.4 Hz, 1H), 3.69 – 3.52 (m, 4H), 2.28 (s, 3H). <sup>13</sup>C NMR (100 MHz, CDCl<sub>3</sub>) δ 138.82, 138.41, 138.30, 137.91, 137.22, 132.20, 130.23, 129.58, 128.45, 128.38, 128.36, 128.19, 127.96, 127.88, 127.82, 127.75, 127.70, 127.59, 127.46, 88.07, 84.25, 77.39, 77.35, 77.26, 77.07, 76.75, 75.66, 74.44, 73.60, 73.56, 72.74, 68.79, 21.15. HRMS (ESI): m/z calcd for C<sub>41</sub>H<sub>42</sub>O<sub>5</sub>SNa ([M + Na]<sup>+</sup>): 669.2645, found: 669.2646.

**3:** To a solution of **S4** (616 mg, 1 mmol) in the mixed solvent acetone–water (9:1, 5 ml) was added N-Bromosuccinimide (534 mg, 3 mmol), and the mixture was stirred vigorously at 0 °C for 30 min. The reaction was quenched by the addition of a saturated solution of Na<sub>2</sub>SO<sub>3</sub>. After further stirring for 5 min, the resulting mixture was diluted with DCM. The organic phase was separated, and the remaining aqueous phase was extracted with DCM. The combined organic phase was washed with brine, dried with Na<sub>2</sub>SO<sub>4</sub>, and evaporated *in vacuo* to afford crude product, which was used in the next step without further purification. To a solution of the crude product in DCM (5 ml) was added Ac<sub>2</sub>O (332 μl, 3 mmol), pyridine (232 μl) and 4-dimethylaminopyridine (12 mg,

0.1 mmol), and the mixture was stirred vigorously at rt for 6 h under Argon atmosphere. Then the solution was concentrated *in vacuo* and purification by flash chromatography (EtOAc/Petroleum ether =1/8) afforded **3** (510 mg, 88%) as a colorless oil. Rf = 0.4 (Petroleum ether /EtOAc 4:1).

**3** ( $\alpha:\beta = 37:63$ ): **<sup>1</sup>H NMR** (400 MHz, CDCl<sub>3</sub>)  $\delta$  7.40 – 7.18 (m, 32H), 6.39 (d, J = 3.7 Hz, 1H), 5.59 (d, J = 8.1 Hz, 1H), 4.94 (dd, J = 11.4, 6.0 Hz, 2H), 4.82 (dd, J = 11.6, 8.3 Hz, 2H), 4.76 – 4.54 (m, 7H), 4.40 (qd, J = 11.7, 6.7 Hz, 3H), 4.17 (dd, J = 10.1, 3.7 Hz, 1H), 4.04 – 3.84 (m, 4H), 3.73 – 3.64 (m, 1H), 3.64 – 3.42 (m, 4H), 2.07 (s, 2H), 1.99 (s, 3H). **<sup>13</sup>C NMR** (100 MHz, CDCl<sub>3</sub>)  $\delta$  169.66, 169.46, 138.74, 138.63, 138.61, 138.53, 138.33, 138.16, 137.91, 137.88, 128.56, 128.51, 128.48, 128.46, 128.40, 128.36, 128.29, 128.13, 128.10, 128.07, 127.99, 127.96, 127.86, 127.83, 127.79, 127.75, 127.68, 127.52, 94.41, 90.91, 82.50, 78.75, 78.28, 75.52, 75.42, 75.05, 74.82, 74.66, 74.18, 73.67, 73.60, 73.46, 73.20, 73.15, 72.94, 71.96, 68.52, 68.07, 60.48, 21.30, 21.16, 21.12, 14.35. **HRMS** (ESI): m/z calcd for C<sub>36</sub>H<sub>26</sub>O<sub>9</sub>Na ([M + Na]<sup>+</sup>): 605.2510, found: 605.2512.

### 3.1.3 Synthesis of mannosyl acetate **4** (According to the general procedure of preparation of **3**)

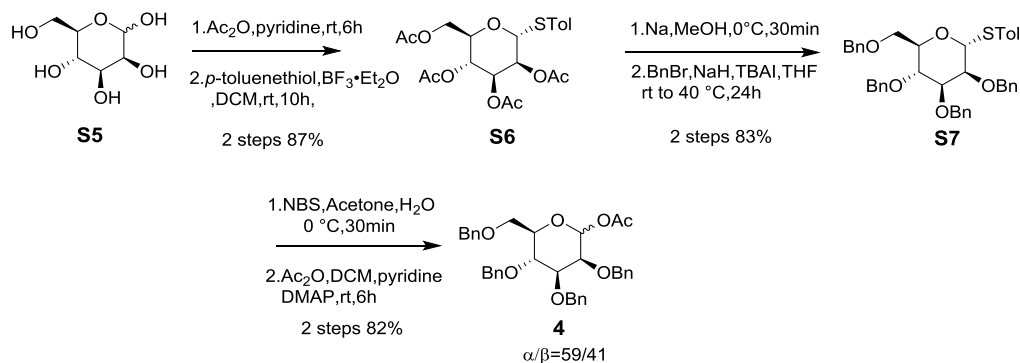

**S6**, colorless oil. Rf = 0.3 (Petroleum ether /EtOAc 2:1), **<sup>1</sup>H NMR** (400 MHz, CDCl<sub>3</sub>)  $\delta$  7.40 – 7.35 (m, 2H), 7.12 (d, J = 7.9 Hz, 2H), 5.50 (dd, J = 2.7, 1.5 Hz, 1H), 5.42 (d, J = 1.7 Hz, 1H), 5.37 – 5.29 (m, 2H), 4.62 – 4.51 (m, 1H), 4.30 (dd, J = 12.2, 5.9 Hz, 1H), 4.11 (dd, J = 12.2, 2.4 Hz, 1H), 2.33 (s, 3H), 2.15 (s, 3H), 2.07 (d, J = 6.0 Hz, 6H), 2.02 (s, 3H). **<sup>13</sup>C NMR** (100 MHz, CDCl<sub>3</sub>)  $\delta$  170.50, 169.88, 169.77, 169.72, 138.42,



132.61, 132.58, 129.94, 129.82, 129.78, 128.75, 85.98, 70.83, 69.39, 69.35, 66.37, 62.47, 21.12, 20.86, 20.70, 20.68, 20.63. **HRMS** (ESI): m/z calcd for C<sub>21</sub>H<sub>26</sub>O<sub>9</sub>SNa ([M + Na]<sup>+</sup>): 477.1190, found: 477.1191.

**S7**, light yellow oil, R<sub>f</sub> = 0.5 (Petroleum ether /EtOAc 8:1), **<sup>1</sup>H NMR** (400 MHz, CDCl<sub>3</sub>) δ 7.41 – 7.24 (m, 21H), 7.24 – 7.17 (m, 3H), 7.03 (d, J = 7.9 Hz, 2H), 5.55 (d, J = 1.7 Hz, 1H), 4.91 (d, J = 10.8 Hz, 1H), 4.75 – 4.45 (m, 8H), 4.30 (ddd, J = 9.9, 5.2, 1.9 Hz, 1H), 4.09 – 3.97 (m, 2H), 3.90 – 3.80 (m, 2H), 3.75 (dd, J = 10.9, 2.0 Hz, 1H), 2.29 (s, 3H). **<sup>13</sup>C NMR** (100 MHz, CDCl<sub>3</sub>) δ 138.51, 138.46, 138.25, 137.98, 137.63, 132.23, 130.58, 129.82, 128.46, 128.41, 128.39, 128.34, 128.30, 128.02, 127.98, 127.88, 127.83, 127.80, 127.74, 127.72, 127.67, 127.65, 127.47, 86.04, 80.21, 76.18, 75.25, 75.09, 73.33, 72.75, 72.11, 71.86, 69.29, 21.18. **HRMS** (ESI): m/z calcd for C<sub>41</sub>H<sub>42</sub>O<sub>5</sub>SNa ([M + Na]<sup>+</sup>): 669.2645, found: 669.2646.

**4** (α:β = 59:41), colorless oil, R<sub>f</sub> = 0.2 (Petroleum ether /EtOAc 10:1). **<sup>1</sup>H NMR** (400 MHz, CDCl<sub>3</sub>) δ 7.41 (td, J = 7.8, 1.9 Hz, 3H), 7.36 – 7.24 (m, 26H), 7.16 (ddd, J = 9.7, 6.7, 2.5 Hz, 4H), 6.22 (d, J = 2.0 Hz, 1H), 5.59 (s, 1H), 4.92 – 4.83 (m, 4H), 4.75 (q, J = 12.4 Hz, 2H), 4.68 – 4.49 (m, 9H), 4.08 (t, J = 9.6 Hz, 1H), 4.03 – 3.92 (m, 2H), 3.85 (dd, J = 9.4, 3.3 Hz, 1H), 3.81 – 3.67 (m, 5H), 3.64 – 3.58 (m, 1H), 3.58 – 3.52 (m, 1H), 2.07 (s, 3H), 2.01 (s, 2H). **<sup>13</sup>C NMR** (100 MHz, CDCl<sub>3</sub>) δ 169.09, 169.02, 138.32, 138.25, 138.21, 138.18, 138.15, 137.98, 137.83, 128.49, 128.40, 128.37, 128.34, 128.32, 128.27, 128.25, 128.08, 128.03, 127.89, 127.79, 127.74, 127.72, 127.68, 127.63, 127.56, 93.31, 91.88, 82.28, 79.14, 77.39, 77.27, 77.07, 76.75, 76.48, 75.33, 75.17, 74.44, 74.30, 74.25, 74.15, 73.52, 73.47, 73.43, 73.35, 72.42, 72.21, 72.12, 68.93, 21.13, 21.08. **HRMS** (ESI): m/z calcd for C<sub>36</sub>H<sub>38</sub>O<sub>7</sub>Na ([M + Na]<sup>+</sup>): 605.2510, found: 605.2510.



– 3.49 (m, 3H), 2.11 (s, 1H), 2.03 (s, 3H), 1.16 (dd,  $J = 13.1, 6.4$  Hz, 4H),  $^{13}\text{C}$  NMR (100 MHz,  $\text{CDCl}_3$ )  $\delta$  169.68, 169.58, 138.76, 138.48, 138.40, 138.36, 138.30, 138.10, 128.52, 128.49, 128.43, 128.39, 128.38, 128.28, 128.25, 128.05, 127.88, 127.77, 127.73, 127.68, 127.63, 127.59, 127.42, 94.30, 90.91, 82.77, 79.02, 78.11, 77.42, 77.36, 77.10, 76.78, 75.93, 75.30, 74.99, 74.73, 73.32, 73.23, 73.14, 71.49, 69.12, 21.25, 21.12, 16.77. **HRMS** (ESI):  $m/z$  calcd for  $\text{C}_{29}\text{H}_{32}\text{O}_6\text{Na}$  ( $[\text{M} + \text{Na}]^+$ ): 499.2091, found: 499.2091.

### 3.1.5 Synthesis of xylosyl acetate 6 (According to the general procedure of preparation of 3)

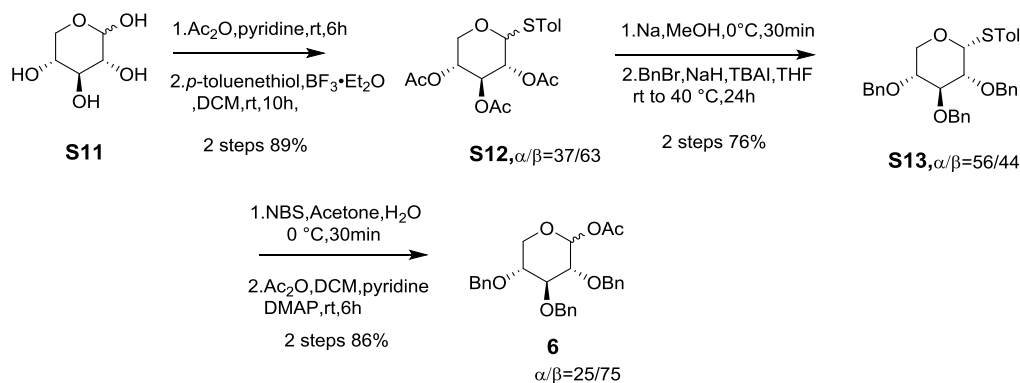

**S12** ( $\alpha:\beta = 37:63$ ), light yellow solid, mp 91–96 °C.  $R_f = 0.35$  (Petroleum ether /EtOAc 4:1),  $^1\text{H}$  NMR (400 MHz,  $\text{CDCl}_3$ )  $\delta$  7.37 (d,  $J = 8.1$  Hz, 2H), 7.17 – 7.03 (m, 3H), 5.17 (t,  $J = 8.3$  Hz, 1H), 4.91 (ddt,  $J = 8.3, 5.7, 2.3$  Hz, 2H), 4.72 (d,  $J = 8.5$  Hz, 1H), 4.25 (dd,  $J = 11.7, 5.0$  Hz, 1H), 3.39 (dd,  $J = 11.7, 9.0$  Hz, 1H), 2.34 (s, 3H), 2.32 (s, 1H), 2.11 (s, 1H), 2.10 (s, 3H), 2.06 (s, 2H), 2.04 (d,  $J = 1.4$  Hz, 5H).  $^{13}\text{C}$  NMR (100 MHz,  $\text{CDCl}_3$ )  $\delta$  169.94, 169.76, 169.73, 169.31, 138.61, 138.02, 133.49, 132.38, 129.93, 129.78, 129.09, 128.05, 86.37, 85.77, 77.39, 77.27, 77.07, 76.75, 72.26, 70.79, 69.83, 69.53, 69.01, 68.46, 65.39, 59.88, 21.18, 21.12, 20.82, 20.79, 20.76, 20.73. **HRMS** (ESI):  $m/z$  calcd for  $\text{C}_{18}\text{H}_{22}\text{O}_7\text{Na}$  ( $[\text{M} + \text{Na}]^+$ ): 405.0978, found: 405.0978.

**S13** ( $\alpha:\beta = 56:44$ ), light yellow oil,  $R_f = 0.3$  (Petroleum ether /EtOAc 10:1),  $^1\text{H}$  NMR (400 MHz, Chloroform- $d$ )  $\delta$  7.45 – 7.25 (m, 30H), 7.10 (dd,  $J = 8.2, 2.2$  Hz, 4H), 5.47

(d,  $J = 4.5$  Hz, 1H), 4.97 – 4.81 (m, 5H), 4.80 – 4.57 (m, 8H), 4.12 – 4.00 (m, 2H), 3.84 – 3.74 (m, 2H), 3.71 – 3.53 (m, 4H), 3.45 – 3.35 (m, 1H), 3.26 – 3.15 (m, 1H), 2.32 (s, 6H).  $^{13}\text{C}$  NMR (100 MHz,  $\text{CDCl}_3$ )  $\delta$  138.78, 138.49, 138.31, 138.15, 138.10, 137.87, 137.83, 137.41, 132.67, 132.26, 130.59, 129.78, 129.75, 128.51, 128.47, 128.45, 128.43, 128.37, 128.22, 128.10, 128.08, 127.99, 127.91, 127.85, 127.82, 127.74, 127.64, 88.76, 87.78, 85.47, 81.67, 80.43, 79.53, 77.80, 77.69, 77.27, 75.79, 75.71, 75.47, 73.57, 73.26, 72.62, 67.54, 60.97, 21.16. HRMS (ESI):  $m/z$  calcd for  $\text{C}_{33}\text{H}_{34}\text{O}_4\text{SNa}$  ( $[\text{M} + \text{Na}]^+$ ): 549.2070, found: 549.2072.

**6** ( $\alpha:\beta = 25:75$ ), colorless oil,  $R_f = 0.2$  (Petroleum ether /EtOAc 12:1),  $^1\text{H}$  NMR (400 MHz,  $\text{CDCl}_3$ )  $\delta$  7.31 (q,  $J = 5.0$  Hz, 15H), 5.55 (d,  $J = 7.8$  Hz, 1H), 4.92 – 4.60 (m, 8H), 3.93 (dd,  $J = 11.8, 4.7$  Hz, 1H), 3.69 – 3.57 (m, 3H), 3.49 (t,  $J = 8.1$  Hz, 1H), 3.36 (dd,  $J = 11.7, 9.4$  Hz, 1H), 2.02 (s, 3H).  $^{13}\text{C}$  NMR (100 MHz,  $\text{CDCl}_3$ )  $\delta$  169.37, 138.45, 138.18, 137.99, 128.54, 128.52, 128.45, 128.44, 128.01, 127.98, 127.97, 127.88, 127.82, 127.77, 94.66, 83.69, 80.46, 77.55, 75.65, 75.11, 73.37, 21.01. HRMS (ESI):  $m/z$  calcd for  $\text{C}_{28}\text{H}_{30}\text{O}_6\text{Na}$  ( $[\text{M} + \text{Na}]^+$ ): 485.1935, found: 485.1933.

### 3.1.6 Synthesis of ribofuranosyl acetate **7**

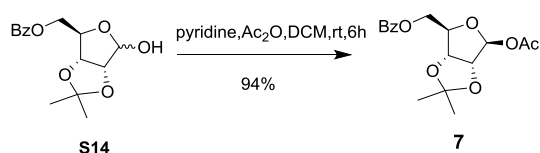

To a solution of **S14**<sup>8</sup> (482 mg, 1.64 mmol) in DCM (8 ml) was added Ac<sub>2</sub>O (462  $\mu\text{l}$ , 4.9 mmol), pyridine (380  $\mu\text{l}$ ) and 4-dimethylaminopyridine (20 mg, 0.1 mmol), and the mixture was stirred vigorously at rt for 6 h under Argon atmosphere. Then the solution was concentrated *in vacuo* and purification by flash chromatography (EtOAc/Petroleum ether =1/8) afforded **7** (520 mg, 94%) as a colorless oil.  $R_f = 0.4$  (Petroleum ether /EtOAc 6:1).  $^1\text{H}$  NMR (400 MHz,  $\text{CDCl}_3$ )  $\delta$  8.05 (dd,  $J = 8.2, 1.4$  Hz, 2H), 7.60 – 7.51 (m, 1H), 7.43 (t,  $J = 7.7$  Hz, 2H), 6.24 (s, 1H), 4.88 – 4.81 (m, 1H), 4.78 (d,  $J = 5.9$  Hz, 1H), 4.62 (t,  $J = 6.1$  Hz, 1H), 4.38 (qd,  $J = 11.7, 6.2$  Hz, 2H), 1.95

(s, 3H), 1.50 (s, 3H), 1.33 (s, 3H).  $^{13}\text{C}$  NMR (100 MHz,  $\text{CDCl}_3$ )  $\delta$  169.35, 165.98, 133.33, 129.72, 129.52, 128.47, 113.24, 102.35, 85.51, 85.28, 81.64, 77.42, 77.10, 76.78, 64.55, 26.48, 25.10, 21.09. **HRMS** (ESI):  $m/z$  calcd for  $\text{C}_{17}\text{H}_{20}\text{O}_7\text{Na}$  ( $[\text{M} + \text{Na}]^+$ ): 359.1101, found: 359.1103.

### 3.1.6 Synthesis of furanosyl acetate **8**

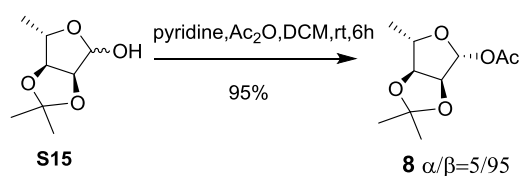

To a solution of **S15**<sup>8</sup> (170 mg, 0.97 mmol) in DCM (4 ml) was added  $\text{Ac}_2\text{O}$  (275  $\mu\text{l}$ , 2.9 mmol), pyridine (250  $\mu\text{l}$ ) and 4-dimethylaminopyridine (12 mg, 0.1 mmol), and the mixture was stirred vigorously at rt for 6 h under Argon atmosphere. Then the solution was concentrated *in vacuo* and purification by flash chromatography (EtOAc/Petroleum ether =1/10) afforded **8** (200 mg, 95%) as a colorless oil.  $R_f = 0.4$  (Petroleum ether /EtOAc 8:1).  $^1\text{H}$  NMR (400 MHz,  $\text{CDCl}_3$ )  $\delta$  6.14 (s, 1H), 4.73 (d,  $J = 5.8$  Hz, 1H), 4.53 (d,  $J = 5.8$  Hz, 1H), 4.42 (q,  $J = 7.0$  Hz, 1H), 2.03 (s, 3H), 1.46 (s, 3H), 1.29 (s, 4H), 1.26 (d,  $J = 7.0$  Hz, 3H).  $^{13}\text{C}$  NMR (100 MHz,  $\text{CDCl}_3$ )  $\delta$  169.55, 112.76, 102.63, 85.56, 84.93, 84.19, 26.44, 25.03, 21.28, 20.61. **HRMS** (ESI):  $m/z$  calcd for  $\text{C}_{10}\text{H}_{16}\text{O}_5\text{Na}$  ( $[\text{M} + \text{Na}]^+$ ): 239.0890, found: 239.0888.

### 3.2. Prepare of C-glycosides

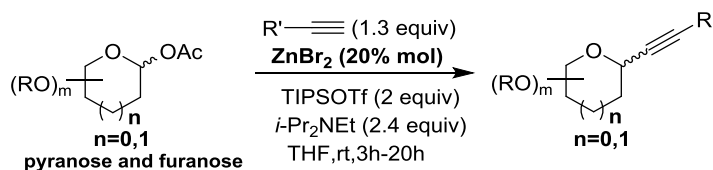

**General Procedure:** To a solution of glycosyl acetate (0.2 mmol) and  $\text{ZnBr}_2$  (9 mg, 20 % mol) in dry THF (1 mL, 0.2 M) was added alkyne (0.26 mmol, 1.3 equiv),  $i\text{-Pr}_2\text{NEt}$  (0.48 mmol, 80  $\mu\text{l}$ , 2.4 equiv) and TIPSOTf (0.4 mmol, 107  $\mu\text{l}$ , 2 equiv) at rt (20  $^\circ\text{C}$  - 25  $^\circ\text{C}$ ) under Argon atmosphere. The reaction was stirred at rt for 20h, then silica gel (200 - 300 mesh, 500mg) was added and concentrated *in vacuo* to afford

yellow powder, which was purified by flash column chromatography on silica gel to give the pure desired product.

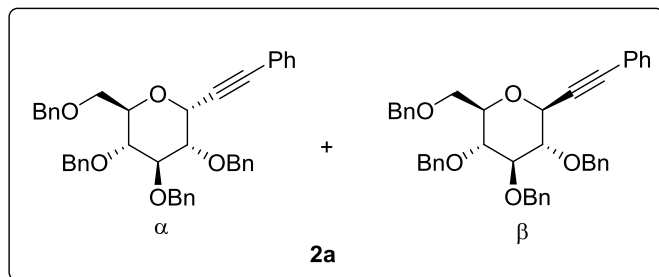

**2a** ( $\alpha:\beta = 88:12$ ): Prepared via **General Procedure**. The crude material was purified by silica gel chromatography (EtOAc/Petroleum ether =1/15) to give compound **2a**<sup>8</sup> (105 mg, 84%) as a colorless oil.  $R_f = 0.35$  (Petroleum ether /EtOAc 10:1).

**2a** ( $\alpha$ -anomer): **<sup>1</sup>H NMR** (400 MHz, CDCl<sub>3</sub>)  $\delta$  7.47 (dd,  $J = 6.9, 2.9$  Hz, 2H), 7.32 (qd,  $J = 19.2, 16.3, 6.7$  Hz, 20H), 7.18 – 7.07 (m, 3H), 5.04 – 4.97 (m, 2H), 4.84 (dt,  $J = 10.9, 2.9$  Hz, 3H), 4.73 (s, 2H), 4.61 (d,  $J = 12.1$  Hz, 1H), 4.50 (dd,  $J = 11.5, 6.1$  Hz, 2H), 4.09 – 3.96 (m, 2H), 3.81 – 3.60 (m, 5H). **<sup>13</sup>C NMR** (100 MHz, CDCl<sub>3</sub>)  $\delta$  138.83, 138.25, 138.18, 137.94, 132.04, 131.85, 128.64, 128.46, 128.42, 128.41, 128.26, 128.07, 128.05, 127.91, 127.85, 127.77, 127.73, 127.62, 122.44, 89.42, 83.94, 83.14, 79.34, 77.55, 75.68, 75.29, 73.73, 73.57, 72.75, 68.67, 67.24. **HRMS** (ESI):  $m/z$  calcd for C<sub>42</sub>H<sub>40</sub>O<sub>5</sub>Na ( $[M + Na]^+$ ): 647.2768, found: 647.2766.

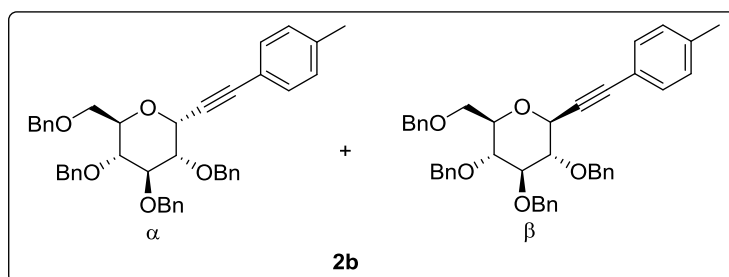

**2b** ( $\alpha:\beta = 83:17$ ): Prepared via **General Procedure**. The crude material was purified by silica gel chromatography (EtOAc/Petroleum ether = 1/12) to give compound **2b** (91 mg, 71%) as a colorless oil.  $R_f = 0.39$  (Petroleum ether /EtOAc 10:1).

**2b** ( $\alpha$ -anomer): **<sup>1</sup>H NMR** (400 MHz, CDCl<sub>3</sub>)  $\delta$  7.33 (dddd,  $J = 23.8, 16.0, 10.4, 6.6$  Hz, 23H), 7.18 – 7.06 (m, 5H), 5.05 – 4.97 (m, 2H), 4.84 (dd,  $J = 10.8, 2.9$  Hz, 3H), 4.73 (s, 2H), 4.62 (d,  $J = 12.2$  Hz, 1H), 4.49 (dd,  $J = 11.4, 4.4$  Hz, 2H), 4.10 – 3.97 (m, 2H), 3.81 – 3.63 (m, 5H), 2.34 (d,  $J = 3.2$  Hz, 3H). **<sup>13</sup>C NMR** (100 MHz, CDCl<sub>3</sub>)  $\delta$  138.83,

138.75, 138.24, 138.19, 137.93, 131.93, 131.74, 129.09, 129.00, 128.46, 128.44, 128.42, 128.40, 128.35, 128.08, 128.05, 127.97, 127.90, 127.85, 127.81, 127.76, 127.71, 127.61, 119.35, 89.56, 83.15, 83.12, 79.33, 77.54, 75.67, 75.28, 73.62, 73.55, 72.69, 68.63, 67.25, 21.56. **HRMS** (ESI):  $m/z$  calcd for  $C_{43}H_{42}O_5Na$  ( $[M + Na]^+$ ): 661.2924, found: 661.2923.

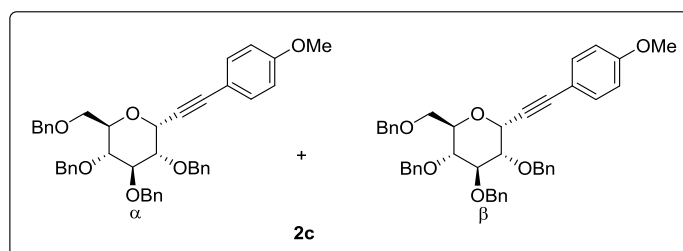

**2c** ( $\alpha:\beta = 79:21$ ): Prepared via **General Procedure**. The crude material was purified by silica gel chromatography (EtOAc/Petroleum ether = 1/10) to give compound **2c** (106 mg, 81%) as a colorless oil.  $R_f = 0.32$  (Petroleum ether /EtOAc 8:1).

**2c** ( $\alpha$ -anomer):  **$^1H$  NMR** (400 MHz,  $CDCl_3$ )  $\delta$  7.34 (ddd,  $J = 35.3, 16.1, 7.4$  Hz, 2H), 7.14 (q,  $J = 5.5, 4.2$  Hz, 3H), 6.83 (dd,  $J = 8.9, 3.0$  Hz, 3H), 5.04 – 4.97 (m, 2H), 4.84 (d,  $J = 10.6$  Hz, 3H), 4.73 (s, 2H), 4.66 – 4.58 (m, 1H), 4.49 (dd,  $J = 11.4, 4.1$  Hz, 2H), 4.09 – 3.97 (m, 2H), 3.80 (d,  $J = 3.5$  Hz, 4H), 3.77 – 3.63 (m, 6H).  **$^{13}C$  NMR** (100 MHz,  $CDCl_3$ )  $\delta$  159.83, 138.84, 138.23, 138.19, 137.93, 133.53, 133.34, 128.46, 128.43, 128.40, 128.35, 128.09, 128.05, 127.97, 127.91, 127.88, 127.86, 127.82, 127.77, 127.71, 127.61, 114.52, 113.96, 113.86, 89.37, 86.12, 83.13, 82.44, 79.33, 77.57, 75.66, 75.29, 73.57, 73.55, 72.68, 68.65, 67.27, 55.32, 55.30. **HRMS** (ESI):  $m/z$  calcd for  $C_{43}H_{42}O_6Na$  ( $[M + Na]^+$ ): 677.2874, found: 677.2872.

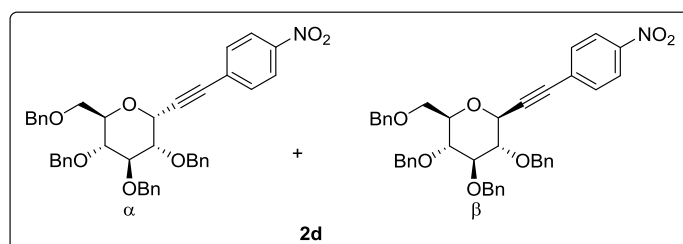

**2d** ( $\alpha:\beta = 95:5$ ): Prepared via **General Procedure**. The crude material was purified by silica gel chromatography (EtOAc/Petroleum ether = 1/10) to give compound **2d** (74 mg, 55%) as a light yellow solid. mp 123–126 °C, Rf = 0.31 (Petroleum ether /EtOAc 10:1).

**2d** ( $\alpha$ -anomer): **<sup>1</sup>H NMR** (400 MHz, CDCl<sub>3</sub>)  $\delta$  8.18 (d,  $J = 8.4$  Hz, 2H), 7.59 (d,  $J = 8.4$  Hz, 2H), 7.43 – 7.25 (m, 17H), 7.13 (dd,  $J = 6.8, 2.8$  Hz, 2H), 5.07 – 4.96 (m, 2H), 4.85 (dd,  $J = 10.7, 4.0$  Hz, 2H), 4.80 – 4.70 (m, 2H), 4.62 (d,  $J = 12.2$  Hz, 1H), 4.50 (dd,  $J = 11.4, 3.6$  Hz, 2H), 4.04 – 3.91 (m, 2H), 3.81 – 3.62 (m, 4H). **<sup>13</sup>C NMR** (100 MHz, CDCl<sub>3</sub>)  $\delta$  147.34, 138.61, 137.97, 137.90, 137.76, 132.79, 129.16, 128.53, 128.48, 128.44, 128.13, 128.05, 128.03, 127.98, 127.93, 127.91, 127.82, 127.71, 123.54, 89.59, 87.31, 83.08, 79.08, 77.35, 75.71, 75.42, 74.13, 73.61, 73.05, 68.50, 67.24. **HRMS** (ESI):  $m/z$  calcd for C<sub>42</sub>H<sub>39</sub>NO<sub>7</sub>Na ([M + Na]<sup>+</sup>): 692.2619, found: 692.2617.

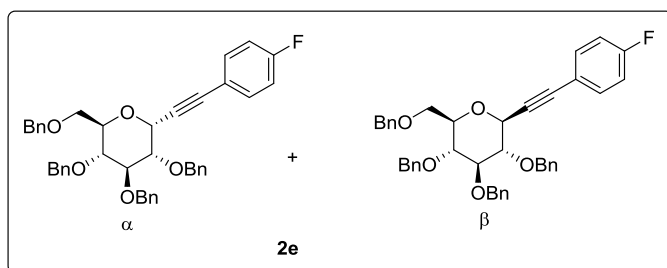

**2e** ( $\alpha:\beta = 92:8$ ): Prepared via **General Procedure**. The crude material was purified by silica gel chromatography (EtOAc/Petroleum ether = 1/12) to give compound **2e** (80 mg, 62%) as a light yellow solid. mp 60–64 °C, Rf = 0.41 (Petroleum ether /EtOAc 8:1).

**2e** ( $\alpha$ -anomer): **<sup>1</sup>H NMR** (400 MHz, CDCl<sub>3</sub>)  $\delta$  7.48 – 7.41 (m, 2H), 7.41 – 7.25 (m, 20H), 7.14 (dd,  $J = 7.0, 2.7$  Hz, 2H), 7.00 (t,  $J = 8.6$  Hz, 2H), 5.04 – 4.96 (m, 2H), 4.84 (d,  $J = 10.8$  Hz, 2H), 4.72 (d,  $J = 13.8$  Hz, 2H), 4.61 (d,  $J = 12.2$  Hz, 1H), 4.56 – 4.46 (m, 2H), 4.06 – 3.96 (m, 2H), 3.80 – 3.61 (m, 5H). **<sup>13</sup>C NMR** (100 MHz, CDCl<sub>3</sub>)  $\delta$  163.94, 161.46, 138.75, 138.14, 138.09, 137.87, 134.01, 133.93, 128.46, 128.44, 128.41, 128.10, 128.04, 128.01, 127.96, 127.91, 127.88, 127.85, 127.81, 127.79, 127.74, 127.63, 118.48, 115.67, 115.45, 88.29, 83.66, 83.10, 79.22, 77.49, 75.67, 75.33, 73.74, 73.57, 72.80, 68.59, 67.18. **HRMS** (ESI):  $m/z$  calcd for C<sub>42</sub>H<sub>39</sub>O<sub>5</sub>FNa ([M + Na]<sup>+</sup>): 665.2674, found: 665.2675.



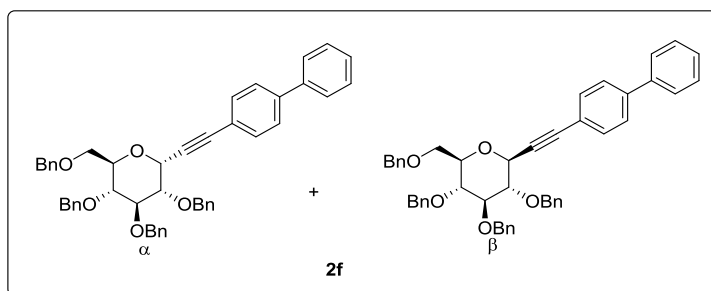

**2f** ( $\alpha:\beta = 83:17$ ): Prepared via **General Procedure**. The crude material was purified by silica gel chromatography (EtOAc/Petroleum ether = 1/12) to give compound **2f** (65 mg, 46%) as a light yellow oil.  $R_f = 0.41$  (Petroleum ether /EtOAc 8:1).

**2f** ( $\alpha$ -anomer):  $^1\text{H NMR}$  (400 MHz,  $\text{CDCl}_3$ )  $\delta$  7.56 (d,  $J = 12.1$  Hz, 7H), 7.46 – 7.23 (m, 25H), 7.18 – 7.10 (m, 3H), 5.06 – 4.98 (m, 2H), 4.85 (d,  $J = 10.7$  Hz, 3H), 4.75 (s, 2H), 4.63 (d,  $J = 12.2$  Hz, 1H), 4.50 (dd,  $J = 11.4, 3.9$  Hz, 2H), 4.12 – 3.98 (m, 2H), 3.85 – 3.61 (m, 6H).  $^{13}\text{C NMR}$  (100 MHz,  $\text{CDCl}_3$ )  $\delta$  141.37, 140.33, 138.82, 138.23, 138.18, 138.00, 137.92, 132.47, 132.27, 128.90, 128.50, 128.48, 128.44, 128.42, 128.09, 128.07, 127.93, 127.87, 127.79, 127.75, 127.73, 127.64, 127.09, 126.95, 121.30, 89.28, 84.60, 83.16, 79.34, 77.54, 75.71, 75.32, 73.75, 73.58, 72.77, 68.65, 67.30. **HRMS** (ESI):  $m/z$  calcd for  $\text{C}_{48}\text{H}_{44}\text{O}_5\text{Na}$  ( $[\text{M} + \text{Na}]^+$ ): 723.3081, found: 723.3080.

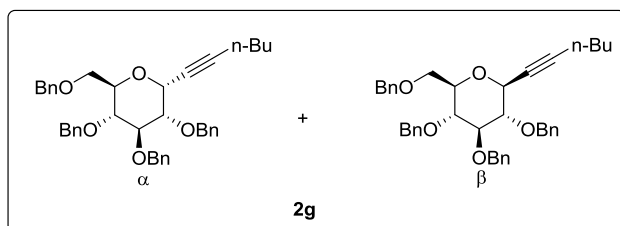

**2g** ( $\alpha:\beta = 94:6$ ): Prepared via **General Procedure**. The crude material was purified by silica gel chromatography (EtOAc/Petroleum ether = 1/12) to give compound **2g**<sup>8</sup> (90 mg, 75%) as a colorless oil.  $R_f = 0.36$  (Petroleum ether /EtOAc 10:1).

**2g** ( $\alpha$ -anomer):  $^1\text{H NMR}$  (400 MHz,  $\text{CDCl}_3$ )  $\delta$  7.39 – 7.24 (m, 18H), 7.14 (dd,  $J = 7.2, 2.5$  Hz, 2H), 4.98 (d,  $J = 10.8$  Hz, 1H), 4.86 – 4.76 (m, 3H), 4.69 (s, 2H), 4.60 (d,  $J = 12.2$  Hz, 1H), 4.48 (d,  $J = 11.6$  Hz, 2H), 4.03 – 3.90 (m, 2H), 3.74 (dd,  $J = 10.7, 3.6$  Hz, 1H), 3.63 (ddd,  $J = 20.0, 10.4, 3.7$  Hz, 3H), 2.26 (td,  $J = 7.0, 2.3$  Hz, 2H), 1.57 – 1.38

(m, 5H), 0.90 (t,  $J = 7.2$  Hz, 3H).  $^{13}\text{C}$  NMR (100 MHz,  $\text{CDCl}_3$ )  $\delta$  138.86, 138.28, 138.18, 137.97, 128.41, 128.39, 128.37, 128.04, 128.00, 127.95, 127.88, 127.77, 127.74, 127.67, 127.58, 90.44, 83.10, 79.30, 77.59, 75.63, 75.21, 74.53, 73.49, 73.20, 72.62, 68.66, 66.83, 30.71, 22.00, 18.71, 13.66. **HRMS** (ESI):  $m/z$  calcd for  $\text{C}_{40}\text{H}_{44}\text{O}_5\text{Na}$  ( $[\text{M} + \text{Na}]^+$ ): 627.3081, found: 627.3082.

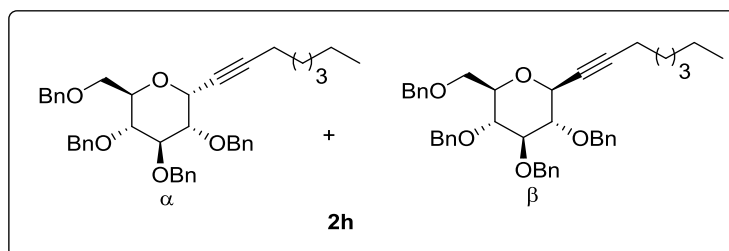

**2h** ( $\alpha:\beta = 94:6$ ): Prepared via **General Procedure**. The crude material was purified by silica gel chromatography (EtOAc/Petroleum ether = 1/12) to give compound **2h** (87 mg, 69%) as a colorless oil.  $R_f = 0.41$  (Petroleum ether /EtOAc 10:1).

**2h** ( $\alpha$ -anomer):  $^1\text{H}$  NMR (400 MHz,  $\text{CDCl}_3$ )  $\delta$  7.40 – 7.25 (m, 18H), 7.13 (dd,  $J = 6.9$ , 2.6 Hz, 2H), 4.98 (d,  $J = 10.8$  Hz, 1H), 4.86 – 4.75 (m, 3H), 4.69 (s, 2H), 4.60 (d,  $J = 12.1$  Hz, 1H), 4.48 (d,  $J = 12.1$  Hz, 2H), 4.02 – 3.90 (m, 2H), 3.74 (dd,  $J = 10.7$ , 3.6 Hz, 1H), 3.63 (qd,  $J = 10.1$ , 9.4, 3.0 Hz, 3H), 2.26 (td,  $J = 7.0$ , 2.2 Hz, 2H), 1.60 – 1.47 (m, 2H), 1.46 – 1.34 (m, 2H), 1.28 (dt,  $J = 7.7$ , 3.8 Hz, 4H), 0.86 (t,  $J = 6.7$  Hz, 3H).  $^{13}\text{C}$  NMR (100 MHz,  $\text{CDCl}_3$ )  $\delta$  138.88, 138.30, 138.18, 137.97, 128.40, 128.37, 128.04, 128.02, 127.99, 127.96, 127.90, 127.85, 127.79, 127.73, 127.68, 127.66, 127.59, 90.50, 83.15, 79.30, 77.59, 75.66, 75.21, 74.56, 73.51, 73.21, 72.63, 68.66, 66.85, 31.38, 28.60, 22.60, 19.03, 14.11. **HRMS** (ESI):  $m/z$  calcd for  $\text{C}_{42}\text{H}_{48}\text{O}_5\text{Na}$  ( $[\text{M} + \text{Na}]^+$ ): 655.3394, found: 655.3391.

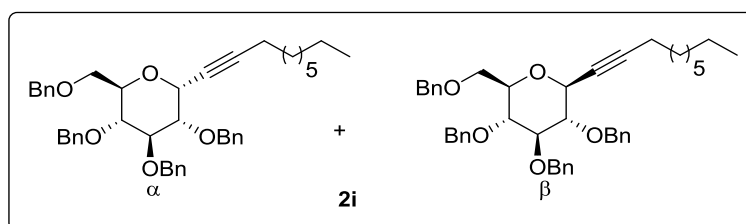

**2i** ( $\alpha:\beta = 94:6$ ): Prepared via **General Procedure**. The crude material was purified by silica gel chromatography (EtOAc/Petroleum ether = 1/12) to give compound **2i** (92 mg, 72%) as a colorless oil. Rf = 0.41 (Petroleum ether /EtOAc 10:1).

**2i** ( $\alpha$ -anomer):  $^1\text{H NMR}$  (400 MHz,  $\text{CDCl}_3$ )  $\delta$  7.39 – 7.25 (m, 18H), 7.17 – 7.09 (m, 2H), 4.98 (d,  $J = 10.8$  Hz, 1H), 4.86 – 4.76 (m, 3H), 4.69 (s, 2H), 4.60 (d,  $J = 12.2$  Hz, 1H), 4.48 (d,  $J = 12.3$  Hz, 2H), 4.01 – 3.89 (m, 2H), 3.74 (dd,  $J = 10.7, 3.6$  Hz, 1H), 3.63 (qd,  $J = 9.9, 9.3, 2.9$  Hz, 3H), 2.25 (td,  $J = 7.1, 2.2$  Hz, 2H), 1.59 – 1.47 (m, 2H), 1.40 (t,  $J = 7.6$  Hz, 2H), 1.26 (q,  $J = 7.8, 7.1$  Hz, 8H), 0.90 – 0.81 (m, 3H).  $^{13}\text{C NMR}$  (100 MHz,  $\text{CDCl}_3$ )  $\delta$  138.88, 138.30, 138.18, 137.97, 128.40, 128.39, 128.37, 128.04, 128.02, 127.99, 127.96, 127.90, 127.79, 127.74, 127.68, 127.58, 90.51, 83.15, 79.30, 77.59, 75.66, 75.22, 74.56, 73.51, 73.20, 72.63, 68.65, 66.85, 31.89, 29.27, 29.17, 28.95, 28.65, 22.69, 19.02, 14.15. **HRMS** (ESI):  $m/z$  calcd for  $\text{C}_{44}\text{H}_{52}\text{O}_5\text{Na}$  ( $[\text{M} + \text{Na}]^+$ ): 683.3707, found: 683.3709.

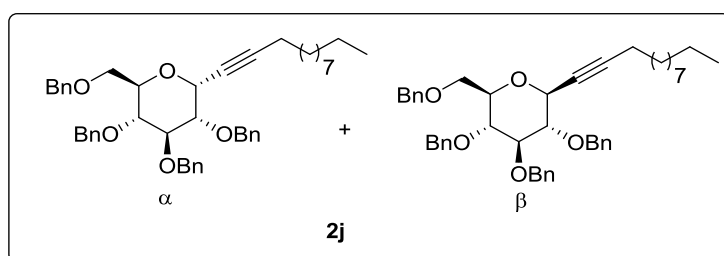

**2j** ( $\alpha:\beta = 95:5$ ): Prepared via **General Procedure**. The crude material was purified by silica gel chromatography (EtOAc/Petroleum ether = 1/12) to give compound **2j** (92 mg, 67%) as a colorless oil. Rf = 0.41 (Petroleum ether /EtOAc 10:1).

**2j** ( $\alpha$ -anomer):  $^1\text{H NMR}$  (400 MHz,  $\text{CDCl}_3$ )  $\delta$  7.38 – 7.24 (m, 18H), 7.13 (dd,  $J = 7.0, 2.5$  Hz, 2H), 4.98 (d,  $J = 10.8$  Hz, 1H), 4.85 – 4.77 (m, 3H), 4.69 (s, 2H), 4.60 (d,  $J = 12.2$  Hz, 1H), 4.48 (d,  $J = 12.5$  Hz, 2H), 4.01 – 3.90 (m, 2H), 3.74 (dd,  $J = 10.7, 3.6$  Hz, 1H), 3.63 (qd,  $J = 10.0, 9.3, 2.9$  Hz, 3H), 2.25 (td,  $J = 7.1, 2.2$  Hz, 2H), 1.58 – 1.47 (m, 2H), 1.40 (t,  $J = 7.5$  Hz, 2H), 1.24 (d,  $J = 6.0$  Hz, 12H), 0.86 (t,  $J = 6.6$  Hz, 3H).  $^{13}\text{C NMR}$  (100 MHz,  $\text{CDCl}_3$ )  $\delta$  138.87, 138.30, 138.19, 137.98, 128.44, 128.41, 128.39, 128.38, 128.04, 128.02, 128.00, 127.96, 127.90, 127.84, 127.79, 127.74, 127.69,

127.66, 127.59, 90.52, 83.16, 79.31, 77.59, 75.67, 75.22, 74.56, 73.51, 73.21, 72.63, 68.66, 66.85, 31.95, 29.67, 29.63, 29.39, 29.24, 28.96, 28.67, 22.73, 19.03, 14.17.

**HRMS** (ESI):  $m/z$  calcd for  $C_{46}H_{56}O_5Na$  ( $[M + Na]^+$ ): 711.4020, found: 711.4021.

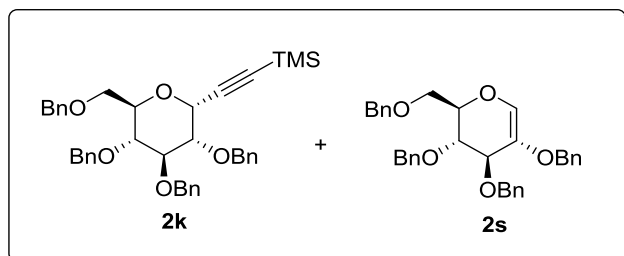

**2k** and **2s**: Prepared via **General Procedure**. The crude material was purified by silica gel chromatography (EtOAc/Petroleum ether = 1/12) to give compounds **2k**<sup>8</sup> (43 mg, 35%) as a colorless oil and **2S** (17 mg, 17%) as a colorless oil, which solidified upon standing (NMR data, see next page).

**2k**:  $R_f$  = 0.38 (Petroleum ether /EtOAc 10:1). **<sup>1</sup>H NMR** (400 MHz,  $CDCl_3$ )  $\delta$  7.46 – 7.29 (m, 18H), 7.24 – 7.16 (m, 2H), 5.01 (d,  $J$  = 10.9 Hz, 1H), 4.91 – 4.83 (m, 3H), 4.74 (s, 2H), 4.66 (d,  $J$  = 12.1 Hz, 1H), 4.54 (dd,  $J$  = 11.4, 4.7 Hz, 2H), 4.05 – 3.94 (m, 2H), 3.81 (dd,  $J$  = 10.8, 3.5 Hz, 1H), 3.75 – 3.64 (m, 3H), 0.26 (s, 9H). **<sup>13</sup>C NMR** (101 MHz,  $CDCl_3$ )  $\delta$  138.80, 138.26, 137.94, 128.43, 128.39, 128.36, 128.11, 128.07, 128.03, 127.79, 127.74, 127.73, 127.71, 127.59, 100.14, 94.84, 82.79, 79.09, 77.41, 75.52, 75.26, 73.49, 72.46, 68.55, 67.03, 0.00. **HRMS** (ESI):  $m/z$  calcd for  $C_{39}H_{44}O_5SiNa$  ( $[M + Na]^+$ ): 643.2850, found: 643.2854.

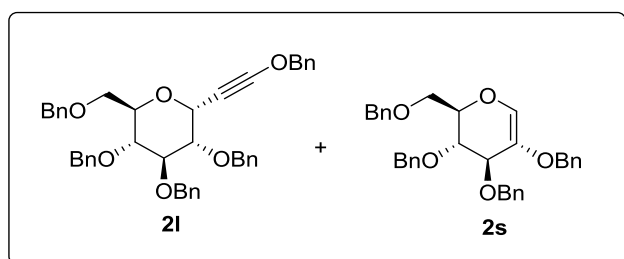

**2l** and **2s**: Prepared via **General Procedure**. The crude material was purified by silica gel chromatography (EtOAc/Petroleum ether = 1/12) to give compounds **2l** (55 mg,

42%) as a colorless oil and **2S** (15mg, 15%) as a colorless oil, which solidified upon standing.

**2I**, Rf = 0.29 (Petroleum ether /EtOAc 10:1). **<sup>1</sup>H NMR** (400 MHz, CDCl<sub>3</sub>) δ 7.40 – 7.23 (m, 23H), 7.13 (dd, *J* = 6.7, 2.7 Hz, 2H), 4.97 (d, *J* = 10.8 Hz, 1H), 4.88 – 4.77 (m, 3H), 4.71 (s, 2H), 4.65 – 4.57 (m, 3H), 4.51 – 4.44 (m, 2H), 4.25 (t, *J* = 2.3 Hz, 2H), 4.03 – 3.91 (m, 2H), 3.74 (dd, *J* = 10.7, 3.6 Hz, 1H), 3.70 – 3.59 (m, 3H). **<sup>13</sup>C NMR** (100 MHz, CDCl<sub>3</sub>) δ 138.73, 138.21, 137.95, 137.88, 137.33, 128.50, 128.45, 128.42, 128.41, 128.26, 128.02, 128.00, 127.97, 127.93, 127.89, 127.77, 127.74, 127.65, 85.49, 83.17, 81.42, 79.09, 77.45, 75.73, 75.24, 73.69, 73.55, 72.95, 71.42, 68.56, 66.79, 57.38. **HRMS** (ESI): *m/z* calcd for C<sub>44</sub>H<sub>44</sub>O<sub>6</sub>Na ([M + Na]<sup>+</sup>): 691.3030, found: 691.3034.

**2s**: mp 60–63 °C, Rf = 0.40 (Petroleum ether /EtOAc 10:1). **<sup>1</sup>H NMR** (400 MHz, CDCl<sub>3</sub>) δ 7.39 – 7.24 (m, 20H), 6.32 (s, 1H), 4.78 – 4.68 (m, 4H), 4.65 – 4.54 (m, 4H), 4.27 (d, *J* = 4.7 Hz, 1H), 4.10 (q, *J* = 2.9 Hz, 1H), 3.91 (dd, *J* = 6.7, 4.6 Hz, 1H), 3.79 (dd, *J* = 10.7, 6.0 Hz, 1H), 3.70 (dd, *J* = 10.7, 3.5 Hz, 1H). **<sup>13</sup>C NMR** (100 MHz, CDCl<sub>3</sub>) δ 138.91, 138.38, 138.04, 137.92, 137.17, 128.45, 128.43, 128.38, 128.34, 127.94, 127.92, 127.85, 127.83, 127.78, 127.70, 127.64, 127.62, 127.58, 76.23, 75.56, 74.24, 73.44, 72.87, 72.29, 71.01, 68.27. **HRMS** (ESI): *m/z* calcd for C<sub>34</sub>H<sub>34</sub>O<sub>5</sub>Na ([M + Na]<sup>+</sup>): 545.2298, found: 545.2298.

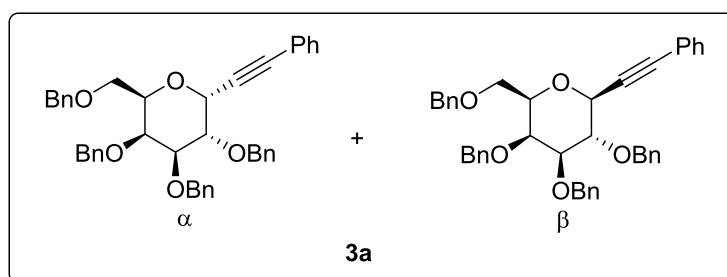

**3a** ( $\alpha$ : $\beta$  = 96:4): Prepared via **General Procedure**. The crude material was purified by silica gel chromatography (EtOAc/Petroleum ether =1/12) to give compounds **3a**  $\alpha$ -anomer<sup>8</sup> (108 mg, 86%) as a white solid and **3a**  $\beta$ -anomer (5 mg, 5%) as a colorless oil. **3a** ( $\alpha$ -anomer), mp 104–110 °C, Rf = 0.35 (Petroleum ether /EtOAc 10:1): **<sup>1</sup>H NMR** (400 MHz, CDCl<sub>3</sub>) δ 7.45 (dt, *J* = 16.0, 5.7 Hz, 6H), 7.33 (td, *J* = 10.7, 8.9, 4.6 Hz,

19H), 5.10 (d,  $J = 5.7$  Hz, 1H), 5.00 (d,  $J = 11.4$  Hz, 1H), 4.92 – 4.85 (m, 1H), 4.84 – 4.76 (m, 3H), 4.64 (d,  $J = 11.3$  Hz, 1H), 4.53 (d,  $J = 11.8$  Hz, 1H), 4.45 (d,  $J = 11.8$  Hz, 1H), 4.23 (dt,  $J = 15.0, 6.1$  Hz, 2H), 4.08 – 3.97 (m, 2H), 3.61 (d,  $J = 6.5$  Hz, 2H).  $^{13}\text{C}$  NMR (100 MHz,  $\text{CDCl}_3$ )  $\delta$  138.76, 138.65, 138.57, 137.94, 132.05, 128.56, 128.44, 128.38, 128.35, 128.28, 128.26, 128.01, 127.78, 127.64, 127.62, 127.53, 122.59, 88.27, 84.38, 79.87, 75.73, 74.94, 74.90, 73.55, 73.07, 72.88, 72.72, 68.77, 67.90. HRMS (ESI):  $m/z$  calcd for  $\text{C}_{42}\text{H}_{40}\text{O}_5\text{Na}$  ( $[\text{M} + \text{Na}]^+$ ): 647.2768, found: 647.2773.

**3a** ( $\beta$ -anomer),  $R_f = 0.33$  (Petroleum ether /EtOAc 10:1):  $^1\text{H}$  NMR (800 MHz,  $\text{CDCl}_3$ )  $\delta$  7.45 – 7.26 (m, 25H), 5.01 (d,  $J = 10.5$  Hz, 1H), 4.97 (d,  $J = 11.6$  Hz, 2H), 4.90 (d,  $J = 10.4$  Hz, 2H), 4.75 (s, 2H), 4.64 (d,  $J = 11.6$  Hz, 2H), 4.47 (d,  $J = 11.8$  Hz, 2H), 4.41 (d,  $J = 11.8$  Hz, 2H), 4.24 (d,  $J = 9.6$  Hz, 2H), 4.10 (t,  $J = 9.5$  Hz, 2H), 3.98 (d,  $J = 2.8$  Hz, 1H), 3.64 – 3.55 (m, 4H).  $^{13}\text{C}$  NMR (200 MHz,  $\text{CDCl}_3$ )  $\delta$  138.57, 138.36, 138.20, 137.75, 131.82, 128.45, 128.40, 128.34, 128.33, 128.26, 128.20, 128.00, 127.80, 127.72, 127.62, 127.58, 127.49, 122.51, 86.46, 85.44, 83.43, 79.17, 75.83, 74.66, 73.74, 73.55, 72.75, 70.85, 68.57.

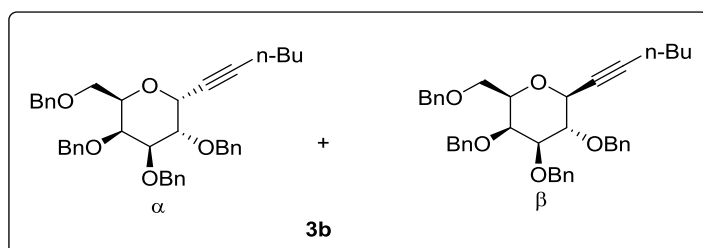

**3b** ( $\alpha:\beta = 98:2$ ): Prepared via **General Procedure**. The crude material was purified by silica gel chromatography (EtOAc/Petroleum ether =1/12) to give compounds **3b**  $\alpha$ -anomer (80 mg, 67%) as a colorless oil and **3b**  $\beta$ -anomer (1.8mg, 1.5%) as a colorless oil.

**3b** ( $\alpha$ -anomer),  $R_f = 0.38$  (Petroleum ether /EtOAc 10:1):  $^1\text{H}$  NMR (400 MHz,  $\text{CDCl}_3$ )  $\delta$  7.41 – 7.22 (m, 20H), 4.93 (d,  $J = 11.4$  Hz, 1H), 4.87 – 4.79 (m, 2H), 4.74 (dd,  $J = 11.9, 6.5$  Hz, 3H), 4.57 (d,  $J = 11.4$  Hz, 1H), 4.48 (d,  $J = 11.8$  Hz, 1H), 4.39 (d,  $J = 11.8$  Hz, 1H), 4.16 – 4.04 (m, 2H), 3.95 (d,  $J = 2.7$  Hz, 1H), 3.87 (dd,  $J = 9.8, 2.9$  Hz, 1H),

3.53 (d,  $J = 6.4$  Hz, 2H), 2.25 (td,  $J = 6.9, 2.1$  Hz, 2H), 1.54 – 1.35 (m, 4H), 0.89 (t,  $J = 7.2$  Hz, 3H).  $^{13}\text{C}$  NMR (100 MHz,  $\text{CDCl}_3$ )  $\delta$  138.86, 138.69, 138.60, 138.02, 128.42, 128.35, 128.29, 128.24, 127.95, 127.76, 127.59, 127.56, 127.54, 127.48, 89.15, 80.01, 75.73, 74.98, 74.87, 73.48, 73.11, 72.78, 72.23, 68.85, 67.55, 30.74, 22.00, 18.66, 13.68. **HRMS** (ESI):  $m/z$  calcd for  $\text{C}_{40}\text{H}_{44}\text{O}_5\text{Na}$  ( $[\text{M} + \text{Na}]^+$ ): 627.3081, found: 627.3083.

**3b** ( $\beta$ -anomer),  $R_f = 0.36$  (Petroleum ether /EtOAc 10:1):  $^1\text{H}$  NMR (800 MHz,  $\text{CDCl}_3$ )  $\delta$  7.38 – 7.27 (m, 20H), 4.95 (dd,  $J = 11.1, 5.4$  Hz, 2H), 4.86 (d,  $J = 10.5$  Hz, 1H), 4.72 (s, 2H), 4.61 (d,  $J = 11.6$  Hz, 2H), 4.44 (d,  $J = 11.7$  Hz, 2H), 4.39 (d,  $J = 11.8$  Hz, 2H), 3.99 (t,  $J = 2.0$  Hz, 2H), 3.97 – 3.92 (m, 2H), 3.58 (t,  $J = 6.2$  Hz, 2H), 3.53 – 3.46 (m, 3H), 3.42 (s, 1H), 2.25 – 2.21 (m, 2H), 1.49 (dd,  $J = 8.5, 6.6$  Hz, 3H), 1.41 – 1.36 (m, 2H), 0.86 (t,  $J = 7.3$  Hz, 3H).  $^{13}\text{C}$  NMR (200 MHz,  $\text{CDCl}_3$ )  $\delta$  138.68, 138.44, 137.78, 128.38, 128.36, 128.27, 128.18, 128.15, 127.99, 127.56, 127.49, 127.47, 86.45, 83.40, 79.43, 75.63, 74.59, 73.71, 73.51, 72.66, 70.59, 68.50, 30.46, 22.02, 18.61, 13.56.

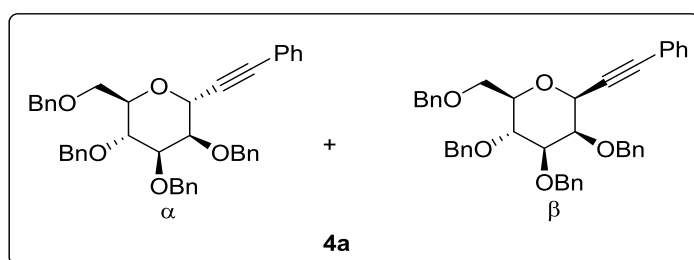

**4a** ( $\alpha:\beta = 95:5$ ): Prepared via **General Procedure**. The crude material was purified by silica gel chromatography (EtOAc/Petroleum ether =1/12) to give compounds **4a**  $\alpha$ -anomer<sup>8</sup> (93 mg, 75%) as a colorless oil and **4a**  $\beta$ -anomer (5 mg, 4%) as a colorless oil. **4a** ( $\alpha$ -anomer),  $R_f = 0.38$  (Petroleum ether /EtOAc 9:1):  $^1\text{H}$  NMR (400 MHz,  $\text{CDCl}_3$ )  $\delta$  7.42 (d,  $J = 7.0$  Hz, 2H), 7.40 – 7.23 (m, 21H), 7.21 – 7.13 (m, 2H), 5.04 (s, 1H), 4.91 (d,  $J = 10.6$  Hz, 1H), 4.80 (d,  $J = 12.6$  Hz, 1H), 4.75 – 4.61 (m, 4H), 4.55 (dd,  $J = 11.4, 5.8$  Hz, 2H), 4.08 (dd,  $J = 27.5, 5.9$  Hz, 3H), 3.91 (d,  $J = 2.7$  Hz, 1H), 3.86 – 3.71 (m, 2H).  $^{13}\text{C}$  NMR (100 MHz,  $\text{CDCl}_3$ )  $\delta$  138.40, 138.36, 138.28, 138.08, 131.83, 128.82, 128.43, 128.40, 128.33, 128.31, 128.20, 127.96, 127.92, 127.73, 127.71, 127.52, 121.91, 89.05, 83.83, 80.02, 76.56, 75.43, 75.02, 74.88, 73.46, 72.06, 71.87, 69.28,

66.66. **HRMS** (ESI):  $m/z$  calcd for  $C_{42}H_{40}O_5Na$  ( $[M + Na]^+$ ): 647.2768, found: 647.2769.

**4a** ( $\beta$ -anomer),  $R_f = 0.36$  (Petroleum ether /EtOAc 9:1):  **$^1H$  NMR** (800 MHz,  $CDCl_3$ )  $\delta$  7.51 – 7.46 (m, 2H), 7.43 – 7.38 (m, 2H), 7.36 – 7.28 (m, 10H), 7.26 – 7.22 (m, 6H), 7.16 (dd,  $J = 7.3, 2.2$  Hz, 2H), 5.05 (d,  $J = 2.6$  Hz, 2H), 4.89 (d,  $J = 10.7$  Hz, 1H), 4.67 – 4.58 (m, 4H), 4.54 (d,  $J = 10.6$  Hz, 1H), 4.38 (d,  $J = 1.1$  Hz, 1H), 4.06 (dd,  $J = 3.0, 1.1$  Hz, 1H), 3.94 (t,  $J = 9.6$  Hz, 1H), 3.79 (dd,  $J = 11.0, 1.9$  Hz, 1H), 3.74 (dd,  $J = 11.0, 5.7$  Hz, 1H), 3.61 – 3.57 (m, 1H), 3.52 (ddd,  $J = 9.8, 5.8, 1.9$  Hz, 1H).  **$^{13}C$  NMR** (200 MHz,  $CDCl_3$ )  $\delta$  138.44, 138.24, 138.18, 138.11, 131.78, 128.53, 128.41, 128.32, 128.27, 128.22, 128.11, 128.04, 127.68, 127.65, 127.56, 127.49, 127.46, 122.43, 85.72, 85.66, 83.59, 79.90, 77.20, 76.83, 75.82, 75.27, 74.69, 74.55, 73.47, 72.03, 69.86, 69.42.

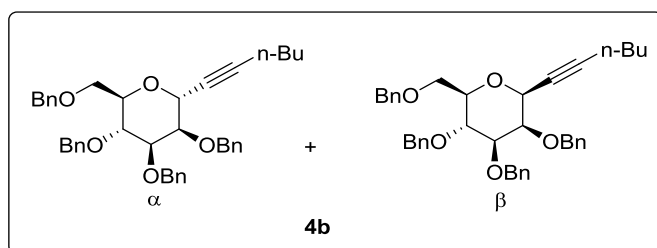

**4b** ( $\alpha:\beta = 92:8$ ): Prepared via **General Procedure**. The crude material was purified by silica gel chromatography (EtOAc/Petroleum ether =1/12) to give compounds **4b**  $\alpha$ -anomer<sup>8</sup> (75 mg, 62%) as a colorless oil and **4b**  $\beta$ -anomer (5 mg, 5%) as a colorless oil.

**4b** ( $\alpha$ -anomer),  $R_f = 0.46$  (Petroleum ether /EtOAc 9:1):  **$^1H$  NMR** (400 MHz,  $CDCl_3$ )  $\delta$  7.43 – 7.24 (m, 18H), 7.17 (dd,  $J = 7.2, 2.4$  Hz, 2H), 4.89 (d,  $J = 10.7$  Hz, 1H), 4.82 (q,  $J = 2.3$  Hz, 1H), 4.76 (d,  $J = 12.6$  Hz, 1H), 4.70 – 4.64 (m, 2H), 4.60 (s, 2H), 4.54 (dd,  $J = 11.4, 9.6$  Hz, 2H), 4.07 – 3.94 (m, 3H), 3.79 (q,  $J = 3.7, 3.2$  Hz, 2H), 3.73 (d,  $J = 10.7$  Hz, 1H), 2.14 (td,  $J = 7.0, 2.1$  Hz, 2H), 1.38 (dtd,  $J = 29.0, 9.9, 8.8, 4.8$  Hz, 4H), 0.88 (t,  $J = 7.2$  Hz, 3H).  **$^{13}C$  NMR** (100 MHz,  $CDCl_3$ )  $\delta$  138.49, 138.43, 138.40, 138.20, 128.36, 128.29, 128.14, 127.91, 127.84, 127.82, 127.64, 127.62, 127.60, 127.46, 90.11, 80.21, 76.66, 75.32, 75.07, 74.77, 74.37, 73.39, 71.93, 71.69, 69.32, 66.35, 30.52, 22.03,



18.48, 13.61. **HRMS** (ESI):  $m/z$  calcd for  $C_{40}H_{44}O_5Na$  ( $[M + Na]^+$ ): 627.3081, found: 627.3081.

**4b** ( $\beta$ -anomer),  $R_f = 0.44$  (Petroleum ether /EtOAc 9:1):  **$^1H$  NMR** (800 MHz,  $CDCl_3$ )  $\delta$  7.49 – 7.36 (m, 3H), 7.36 – 7.26 (m, 14H), 7.25 (d,  $J = 1.6$  Hz, 3H), 7.18 – 7.09 (m, 2H), 5.00 (d,  $J = 1.7$  Hz, 2H), 4.86 (d,  $J = 10.7$  Hz, 1H), 4.70 (s, 2H), 4.62 – 4.50 (m, 5H), 4.13 (td,  $J = 2.0, 1.0$  Hz, 1H), 3.94 (dd,  $J = 3.0, 1.0$  Hz, 1H), 3.91 – 3.86 (m, 1H), 3.80 – 3.67 (m, 3H), 3.54 (dd,  $J = 9.4, 3.0$  Hz, 1H), 3.46 – 3.40 (m, 1H), 2.22 (tt,  $J = 7.1, 2.2$  Hz, 2H), 1.51 – 1.43 (m, 2H), 1.41 – 1.35 (m, 2H), 0.88 (t,  $J = 7.4$  Hz, 3H).  **$^{13}C$  NMR** (200 MHz,  $CDCl_3$ )  $\delta$  128.41, 128.39, 128.37, 128.34, 128.29, 128.24, 128.11, 128.04, 128.01, 127.91, 127.88, 127.75, 127.61, 127.58, 127.53, 127.43, 127.37, 86.82, 83.57, 79.68, 76.05, 75.22, 74.72, 74.48, 73.41, 71.88, 69.49, 69.48, 30.37, 22.04, 18.60, 13.58.

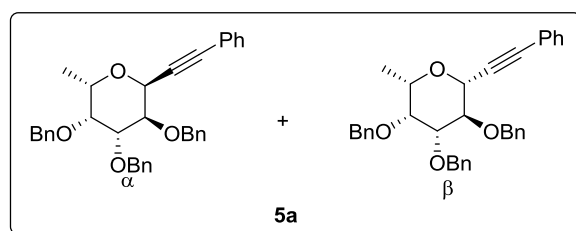

**5a** ( $\alpha:\beta = 97:3$ ): Prepared via **General Procedure**. The crude material was purified by silica gel chromatography (EtOAc/Petroleum ether =1/10) to give compounds **5a**  $\alpha$ -anomer<sup>9</sup> (93 mg, 90%) as a white solid and **5a**  $\beta$ -anomer (3 mg, 3%) as a colorless oil.

**5a** ( $\alpha$ -anomer), mp 79–83 °C.  $R_f = 0.42$  (Petroleum ether /EtOAc 8:1):  **$^1H$  NMR** (400 MHz,  $CDCl_3$ )  $\delta$  7.47 – 7.24 (m, 20H), 5.03 (d,  $J = 5.7$  Hz, 1H), 4.99 (d,  $J = 11.6$  Hz, 1H), 4.88 (d,  $J = 11.9$  Hz, 1H), 4.81 – 4.71 (m, 3H), 4.67 (d,  $J = 11.5$  Hz, 1H), 4.14 (dq,  $J = 28.5, 6.0$  Hz, 2H), 3.96 (dd,  $J = 9.8, 2.8$  Hz, 1H), 3.67 (d,  $J = 2.6$  Hz, 1H), 1.16 (d,  $J = 6.4$  Hz, 3H).  **$^{13}C$  NMR** (100 MHz,  $CDCl_3$ )  $\delta$  138.87, 138.60, 138.56, 131.98, 128.57, 128.49, 128.39, 128.33, 128.26, 128.25, 127.78, 127.66, 127.60, 127.53, 122.68, 87.87, 84.83, 80.17, 77.58, 75.62, 74.96, 73.22, 72.77, 69.90, 67.62, 16.97. **HRMS** (ESI):  $m/z$  calcd for  $C_{35}H_{34}O_4Na$  ( $[M + Na]^+$ ): 541.2349, found: 541.2346.

**5a** ( $\beta$ -anomer),  $R_f = 0.40$  (Petroleum ether /EtOAc 8:1):  $^1\text{H NMR}$  (800 MHz,  $\text{CDCl}_3$ )  $\delta$  7.44 (dd,  $J = 8.1, 1.6$  Hz, 2H), 7.38 (ddd,  $J = 7.5, 4.9, 2.0$  Hz, 5H), 7.36 – 7.26 (m, 11H), 5.02 (t,  $J = 11.5$  Hz, 2H), 4.91 (d,  $J = 10.5$  Hz, 1H), 4.81 (d,  $J = 11.8$  Hz, 1H), 4.75 (dd,  $J = 22.4, 11.7$  Hz, 2H), 4.23 (d,  $J = 9.6$  Hz, 1H), 4.10 (t,  $J = 9.5$  Hz, 1H), 3.64 (dd,  $J = 2.9, 1.0$  Hz, 1H), 3.56 (dd,  $J = 9.5, 2.9$  Hz, 1H), 3.53 (dd,  $J = 6.4, 1.1$  Hz, 1H), 1.22 (d,  $J = 6.4$  Hz, 3H).  $^{13}\text{C NMR}$  (200 MHz,  $\text{CDCl}_3$ )  $\delta$  138.44, 138.26, 131.82, 128.50, 128.42, 128.40, 128.34, 128.32, 128.18, 127.71, 127.65, 127.64, 127.53, 122.58, 86.65, 85.27, 83.79, 79.06, 76.56, 75.75, 74.77, 74.71, 72.96, 70.69, 17.28.

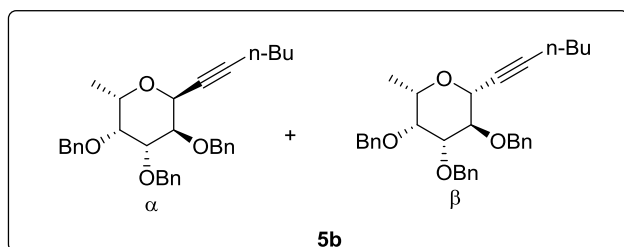

**5b** ( $\alpha:\beta = 97:3$ ): Prepared via **General Procedure**. The crude material was purified by silica gel chromatography (EtOAc/Petroleum ether =1/10) to give compounds **5b**  $\alpha$ -anomer (90 mg, 91%) as a white solid and **5b**  $\beta$ -anomer (3 mg, 3%) as a colorless oil.

**5b** ( $\alpha$ -anomer), mp 70–73 °C,  $R_f = 0.43$  (Petroleum ether /EtOAc 8:1):  $^1\text{H NMR}$  (400 MHz,  $\text{CDCl}_3$ )  $\delta$  7.33 (dddd,  $J = 29.4, 16.1, 7.3, 3.3$  Hz, 15H), 4.97 (d,  $J = 11.6$  Hz, 1H), 4.87 (d,  $J = 11.9$  Hz, 1H), 4.81 (d,  $J = 5.7$  Hz, 1H), 4.77 – 4.70 (m, 3H), 4.65 (d,  $J = 11.6$  Hz, 1H), 4.10 – 3.99 (m, 2H), 3.86 (dd,  $J = 9.8, 2.8$  Hz, 1H), 3.63 (d,  $J = 2.7$  Hz, 1H), 2.25 (td,  $J = 6.9, 2.1$  Hz, 2H), 1.45 (dtd,  $J = 32.4, 9.9, 8.8, 4.7$  Hz, 4H), 1.13 (d,  $J = 6.4$  Hz, 3H), 0.90 (t,  $J = 7.2$  Hz, 3H).  $^{13}\text{C NMR}$  (100 MHz,  $\text{CDCl}_3$ )  $\delta$  138.99, 138.63, 138.61, 128.56, 128.35, 128.27, 128.20, 127.76, 127.61, 127.54, 127.48, 88.66, 80.31, 77.64, 75.61, 75.26, 74.87, 73.25, 72.67, 69.33, 67.25, 30.76, 21.97, 18.62, 16.93, 13.65. **HRMS** (ESI):  $m/z$  calcd for  $\text{C}_{33}\text{H}_{38}\text{O}_4\text{Na}$  ( $[\text{M} + \text{Na}]^+$ ): 521.2662, found: 521.2669.

**5b** ( $\beta$ -anomer),  $R_f = 0.40$  (Petroleum ether /EtOAc 8:1):  $^1\text{H NMR}$  (800 MHz,  $\text{CDCl}_3$ )  $\delta$  7.40 – 7.26 (m, 14H), 5.01 – 4.93 (m, 2H), 4.87 (d,  $J = 10.5$  Hz, 1H), 4.81 – 4.68 (m,

3H), 4.00 – 3.91 (m, 2H), 3.60 (dd,  $J = 3.0, 1.0$  Hz, 1H), 3.52 – 3.42 (m, 2H), 2.27 – 2.19 (m, 2H), 1.51 – 1.44 (m, 2H), 1.43 – 1.35 (m, 2H), 1.19 (d,  $J = 6.4$  Hz, 3H), 0.86 (t,  $J = 7.4$  Hz, 3H).  $^{13}\text{C NMR}$  (200 MHz,  $\text{CDCl}_3$ )  $\delta$  138.51, 128.43, 128.39, 128.27, 128.16, 128.14, 127.62, 127.59, 127.55, 127.50, 86.24, 83.77, 79.32, 76.60, 75.55, 74.62, 74.47, 72.89, 70.41, 30.47, 22.05, 18.64, 17.30, 13.57.

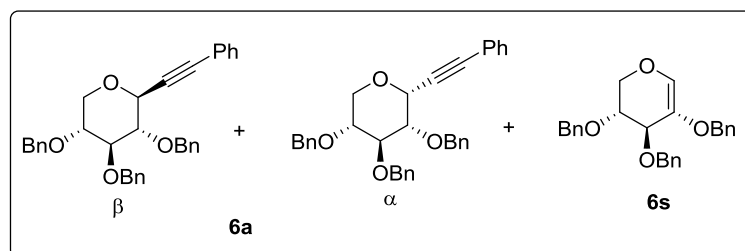

**6a** ( $\alpha/\beta = 20/80$ ): Prepared via **General Procedure**. The crude material was purified by silica gel chromatography (EtOAc/Petroleum ether =1/15) to give compounds **6a** (81 mg, 81%) as a colorless oil and **6s** (5 mg, 10%) as a colorless oil.

**6a** ( $\alpha/\beta = 20/80$ ),  $R_f = 0.39$  (Petroleum ether /EtOAc 12:1):  $^1\text{H NMR}$  (400 MHz,  $\text{CDCl}_3$ )  $\delta$  7.49 (d,  $J = 5.1$  Hz, 1H), 7.46 – 7.24 (m, 28H), 5.03 (d,  $J = 10.5$  Hz, 1H), 4.90 (dt,  $J = 9.7, 4.4$  Hz, 4H), 4.85 (d,  $J = 3.2$  Hz, 1H), 4.74 (dd,  $J = 6.9, 4.7$  Hz, 3H), 4.64 (d,  $J = 11.6$  Hz, 2H), 4.20 (d,  $J = 8.5$  Hz, 1H), 4.02 (dd,  $J = 11.5, 5.0$  Hz, 1H), 3.91 (d,  $J = 9.0$  Hz, 1H), 3.87 – 3.77 (m, 1H), 3.63 (dt,  $J = 14.5, 7.3$  Hz, 4H), 3.25 (t,  $J = 10.7$  Hz, 1H).  $^{13}\text{C NMR}$  (100 MHz,  $\text{CDCl}_3$ )  $\delta$  138.82, 138.63, 138.26, 138.21, 138.07, 138.04, 132.02, 131.77, 128.72, 128.63, 128.52, 128.49, 128.45, 128.43, 128.37, 128.36, 128.27, 128.25, 128.09, 127.98, 127.95, 127.91, 127.88, 127.86, 127.81, 127.71, 127.62, 122.43, 122.19, 89.18, 86.19, 85.93, 85.22, 83.78, 82.17, 82.12, 78.93, 77.88, 77.75, 77.39, 75.78, 75.72, 75.66, 73.63, 73.52, 72.91, 70.94, 68.18, 67.54, 63.60. **HRMS** (ESI):  $m/z$  calcd for  $\text{C}_{34}\text{H}_{32}\text{O}_4\text{Na}$  ( $[\text{M} + \text{Na}]^+$ ): 527.2193, found: 527.2197.

**6s**,  $R_f = 0.36$  (Petroleum ether /EtOAc 12:1):  $^1\text{H NMR}$  (400 MHz,  $\text{CDCl}_3$ )  $\delta$  7.39 – 7.26 (m, 15H), 6.41 (s, 1H), 4.74 – 4.63 (m, 5H), 4.59 (d,  $J = 11.1$  Hz, 3H), 4.08 (dt,  $J = 11.7, 2.1$  Hz, 1H), 3.96 (t,  $J = 1.9$  Hz, 1H), 3.79 (dd,  $J = 11.7, 1.5$  Hz, 1H), 3.64 (q,  $J = 2.3$  Hz, 1H).  $^{13}\text{C NMR}$  (100 MHz,  $\text{CDCl}_3$ )  $\delta$  138.49, 138.31, 137.79, 137.32, 129.18,



**7a** ( $\alpha:\beta = 34:66$ ): Prepared via **General Procedure**. The crude material was purified by silica gel chromatography (EtOAc/Petroleum ether =1/10) to give compounds **7a**  $\beta$ -anomer<sup>8</sup> (34 mg, 45%) as a colorless oil and **7a**  $\alpha$ -anomer (16 mg, 21%) as a colorless oil.

**7a** ( $\beta$ -anomer), Rf = 0.45 (Petroleum ether /EtOAc 6:1), <sup>1</sup>H NMR (400 MHz, CDCl<sub>3</sub>)  $\delta$  8.08 (d,  $J = 7.7$  Hz, 1H), 7.54 (t,  $J = 7.4$  Hz, 1H), 7.40 (t,  $J = 7.7$  Hz, 3H), 7.29 (d,  $J = 7.4$  Hz, 2H), 4.99 (p,  $J = 2.7$  Hz, 1H), 4.91 – 4.84 (m, 1H), 4.62 (dd,  $J = 11.2, 6.0$  Hz, 1H), 4.58 – 4.46 (m, 2H), 1.57 (s, 2H), 1.38 (s, 2H). <sup>13</sup>C NMR (100 MHz, CDCl<sub>3</sub>)  $\delta$  166.23, 133.16, 131.65, 129.78, 129.69, 128.72, 128.39, 128.29, 121.99, 113.95, 87.29, 86.54, 86.23, 83.69, 82.98, 75.41, 64.32, 26.94, 25.37. HRMS (ESI): m/z calcd for C<sub>23</sub>H<sub>22</sub>O<sub>5</sub>Na ([M + Na]<sup>+</sup>): 401.1359, found: 401.1356.

**7a** ( $\alpha$ -anomer), Rf = 0.25 (Petroleum ether /EtOAc 6:1). <sup>1</sup>H NMR (400 MHz, CDCl<sub>3</sub>)  $\delta$  8.05 – 7.96 (m, 2H), 7.59 (d,  $J = 7.5$  Hz, 1H), 7.52 – 7.27 (m, 7H), 5.09 (d,  $J = 4.7$  Hz, 1H), 4.93 (dd,  $J = 6.1, 4.7$  Hz, 1H), 4.85 (dd,  $J = 6.1, 1.5$  Hz, 1H), 4.59 – 4.46 (m, 2H), 4.40 (dd,  $J = 11.9, 4.2$  Hz, 1H), 1.64 (s, 3H), 1.41 (s, 3H). <sup>13</sup>C NMR (100 MHz, CDCl<sub>3</sub>)  $\delta$  166.15, 133.40, 131.95, 129.64, 129.46, 128.61, 128.58, 128.20, 122.43, 114.05, 88.59, 82.99, 82.76, 82.03, 81.63, 73.65, 64.69, 26.51, 25.55. HRMS (ESI): m/z calcd for C<sub>23</sub>H<sub>22</sub>O<sub>5</sub>Na ([M + Na]<sup>+</sup>): 401.1359, found: 401.1358.

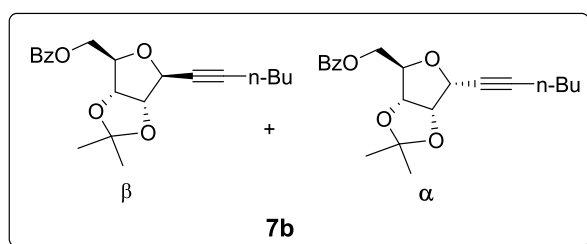

**7b** ( $\alpha:\beta = 31:69$ ): Prepared via **General Procedure**. The crude material was purified by silica gel chromatography (EtOAc/Petroleum ether =1/10) to give compounds **7b**  $\beta$ -anomer (28 mg, 39%) as a colorless oil and **7b**  $\alpha$ -anomer (12 mg, 17%) as a colorless oil.

**7b** ( $\beta$ -anomer), Rf = 0.38 (Petroleum ether /EtOAc 9:1):  **$^1\text{H NMR}$**  (400 MHz,  $\text{CDCl}_3$ )  $\delta$  8.08 (dd,  $J = 8.0, 1.5$  Hz, 2H), 7.61 – 7.51 (m, 1H), 7.45 (t,  $J = 7.6$  Hz, 2H), 4.81 (qd,  $J = 6.2, 2.2$  Hz, 2H), 4.74 (q,  $J = 2.2$  Hz, 1H), 4.55 (dd,  $J = 11.4, 6.2$  Hz, 1H), 4.51 – 4.38 (m, 2H), 2.16 (td,  $J = 7.0, 2.1$  Hz, 2H), 1.54 (s, 3H), 1.48 – 1.36 (m, 4H), 1.35 (s, 4H), 0.88 (t,  $J = 7.2$  Hz, 3H).  **$^{13}\text{C NMR}$**  (100 MHz,  $\text{CDCl}_3$ )  $\delta$  166.20, 133.13, 129.78, 128.38, 113.81, 88.43, 86.66, 83.42, 82.95, 77.43, 75.07, 64.40, 30.35, 26.91, 25.35, 21.95, 18.44, 13.55. **HRMS** (ESI):  $m/z$  calcd for  $\text{C}_{21}\text{H}_{26}\text{O}_5\text{Na}$  ( $[\text{M} + \text{Na}]^+$ ): 381.1672, found: 381.1672.

**7b** ( $\alpha$ -anomer), Rf = 0.28 (Petroleum ether /EtOAc 9:1):  **$^1\text{H NMR}$**  (400 MHz,  $\text{CDCl}_3$ )  $\delta$  8.00 (dd,  $J = 8.2, 1.4$  Hz, 2H), 7.63 – 7.54 (m, 1H), 7.46 (t,  $J = 7.6$  Hz, 2H), 4.82 (ddt,  $J = 11.7, 7.6, 3.9$  Hz, 3H), 4.51 – 4.29 (m, 3H), 2.29 (td,  $J = 7.1, 1.8$  Hz, 2H), 1.59 (s, 3H), 1.56 – 1.48 (m, 2H), 1.47 – 1.41 (m, 2H), 1.39 (s, 3H), 0.90 (t,  $J = 7.2$  Hz, 3H).  **$^{13}\text{C NMR}$**  (100 MHz,  $\text{CDCl}_3$ )  $\delta$  166.14, 133.35, 129.63, 129.47, 128.54, 113.70, 89.75, 82.72, 81.93, 81.44, 77.22, 73.69, 73.30, 64.64, 30.54, 26.43, 25.43, 21.92, 18.69, 13.61. **HRMS** (ESI):  $m/z$  calcd for  $\text{C}_{21}\text{H}_{26}\text{O}_5\text{Na}$  ( $[\text{M} + \text{Na}]^+$ ): 381.1672, found: 381.1670.

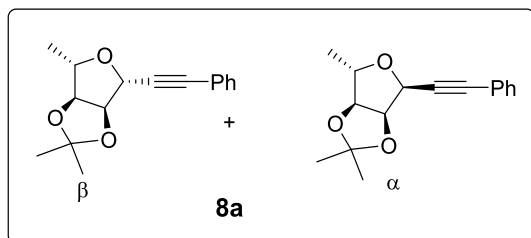

**8a** ( $\alpha:\beta = 7:93$ ): Prepared via **General Procedure**. The crude material was purified by silica gel chromatography (EtOAc/Petroleum ether =1/40) to give compound **8a**  $\beta$ -anomer<sup>8</sup> (43 mg, 83%) as a colorless oil and **8a**  $\alpha$ -anomer (3 mg, 6%) as a colorless oil.

**8a** ( $\beta$ -anomer), Rf = 0.45 (Petroleum ether /EtOAc 16:1):  **$^1\text{H NMR}$**  (400 MHz,  $\text{CDCl}_3$ )  $\delta$  7.43 (dd,  $J = 7.3, 2.4$  Hz, 2H), 7.30 (dd,  $J = 5.5, 1.9$  Hz, 3H), 4.91 (dd,  $J = 6.5, 3.2$  Hz, 1H), 4.80 (d,  $J = 3.2$  Hz, 1H), 4.51 (dd,  $J = 6.5, 3.0$  Hz, 1H), 4.20 (dd,  $J = 6.7, 3.0$  Hz, 1H), 1.42 (d,  $J = 6.7$  Hz, 3H), 1.36 (s, 3H).  **$^{13}\text{C NMR}$**  (100 MHz,  $\text{CDCl}_3$ )  $\delta$  131.64, 128.59, 128.27, 122.33, 114.19, 86.87, 86.78, 86.64, 86.31, 81.89, 74.45, 26.97, 25.33, 19.33. **HRMS** (ESI):  $m/z$  calcd for  $\text{C}_{16}\text{H}_{18}\text{O}_3\text{Na}$  ( $[\text{M} + \text{Na}]^+$ ): 281.1148, found: 281.1149.

**8a** ( $\alpha$ -anomer), Rf = 0.21 (Petroleum ether /EtOAc 16:1):  $^1\text{H NMR}$  (800 MHz,  $\text{CDCl}_3$ )  $\delta$  7.48 (dd,  $J = 7.8, 1.8$  Hz, 2H), 7.33 – 7.27 (m, 3H), 4.88 – 4.82 (m, 2H), 4.49 (dd,  $J = 6.2, 1.8$  Hz, 1H), 4.35 (dd,  $J = 6.9, 1.8$  Hz, 1H), 1.62 – 1.59 (m, 3H), 1.39 – 1.37 (m, 3H), 1.22 (d,  $J = 6.8$  Hz, 3H).  $^{13}\text{C NMR}$  (200 MHz,  $\text{CDCl}_3$ )  $\delta$  131.90, 128.43, 128.13, 122.61, 114.04, 88.27, 86.10, 83.36, 81.76, 79.38, 71.31, 26.44, 25.48, 16.93.

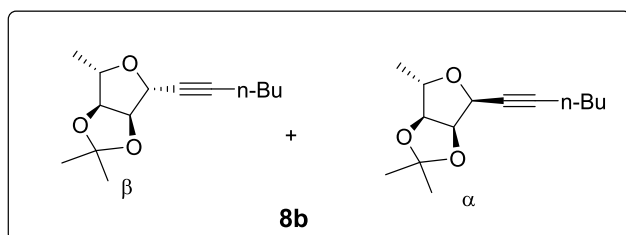

**8b** ( $\alpha:\beta = 8:92$ ): Prepared via **General Procedure**. The crude material was purified by silica gel chromatography (EtOAc/Petroleum ether =1/40) to give compound **8b**  $\beta$ -anomer (39 mg, 82%) as a colorless oil and **8b**  $\alpha$ -anomer (3 mg, 6%) as a colorless oil.

**8b** ( $\beta$ -anomer), Rf = 0.5 (Petroleum ether /EtOAc 18:1) :  $^1\text{H NMR}$  (400 MHz,  $\text{CDCl}_3$ )  $\delta$  4.74 (dd,  $J = 6.6, 3.5$  Hz, 1H), 4.53 (dt,  $J = 4.0, 2.2$  Hz, 1H), 4.43 (dd,  $J = 6.6, 3.3$  Hz, 1H), 4.08 (dd,  $J = 6.7, 3.3$  Hz, 1H), 2.21 (td,  $J = 7.0, 2.1$  Hz, 2H), 1.52 (s, 3H), 1.49 – 1.43 (m, 2H), 1.41 (d,  $J = 7.2$  Hz, 2H), 1.37 (d,  $J = 6.7$  Hz, 3H), 1.33 (s, 3H).  $^{13}\text{C NMR}$  (100 MHz,  $\text{CDCl}_3$ )  $\delta$  114.23, 87.70, 86.88, 86.25, 81.45, 77.73, 74.16, 30.46, 27.00, 25.34, 21.94, 19.26, 18.48, 13.58. **HRMS** (ESI): m/z calcd for  $\text{C}_{14}\text{H}_{22}\text{O}_3\text{Na}$  ( $[\text{M} + \text{Na}]^+$ ): 261.1461, found: 261.1462.

**8b** ( $\alpha$ -anomer), Rf = 0.22 (Petroleum ether /EtOAc 18:1):  $^1\text{H NMR}$  (800 MHz,  $\text{CDCl}_3$ )  $\delta$  4.72 (dd,  $J = 6.2, 4.6$  Hz, 1H), 4.62 (ddd,  $J = 4.1, 2.1, 1.4$  Hz, 1H), 4.44 (dd,  $J = 6.2, 1.6$  Hz, 1H), 4.30 – 4.25 (m, 1H), 2.27 (dd,  $J = 7.2, 2.1$  Hz, 2H), 1.57 – 1.56 (m, 3H), 1.54 – 1.49 (m, 2H), 1.42 (dt,  $J = 8.2, 7.2$  Hz, 2H), 1.36 – 1.35 (m, 3H), 1.16 (d,  $J = 6.9$  Hz, 2H), 0.90 (t,  $J = 7.3$  Hz, 3H).  $^{13}\text{C NMR}$  (200 MHz,  $\text{CDCl}_3$ )  $\delta$  113.58, 89.28, 86.07, 86.07, 81.65, 79.16, 70.86, 30.57, 26.35, 25.34, 21.90, 18.67, 16.79, 13.59.

### 3.3 Formal Synthesis of (+)-Varitriol

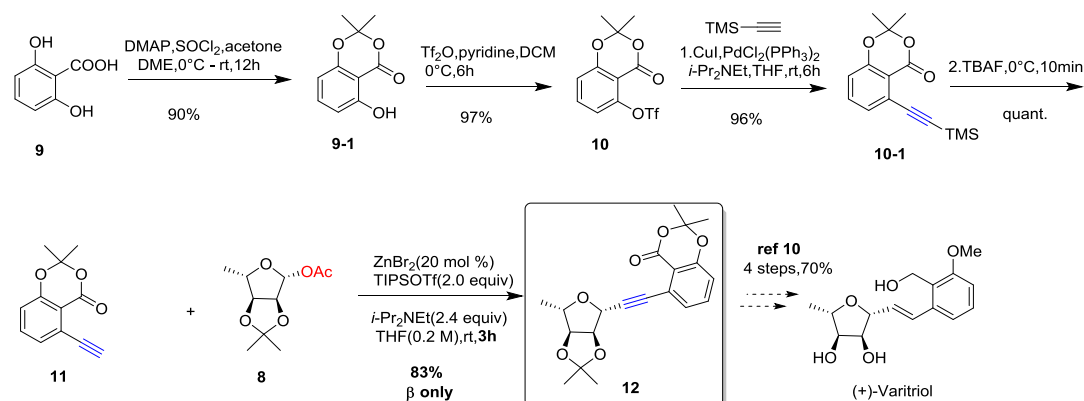

**9-1:** A solution of thionyl chloride (1.87 mL, 26 mmol) in dimethoxyethane (3 mL) was added dropwise to a stirred solution of 2,6-dihydroxybenzoic acid (3.08 g, 20 mmol), DMAP (122 mg, 1 mmol) and acetone (1.85 mL, 26 mmol) in dimethoxyethane (12 mL) at 0 °C under Argon atmosphere. After the addition, the temperature was increased to rt and stirred overnight. The solvents were removed in vacuo and the remaining residue was dissolved in saturated aqueous NaHCO<sub>3</sub>, extracted with EtOAc, and washed with brine. The organic phase was dried by Na<sub>2</sub>SO<sub>4</sub> and concentrated in vacuo. Purification by flash chromatography (EtOAc/Petroleum ether = 1/10) afforded **9-1**<sup>10</sup> (3.5 g, 90%) as a white solid. mp 61–63 °C, R<sub>f</sub> = 0.7 (Petroleum ether /EtOAc 4:1). <sup>1</sup>H NMR (400 MHz, CDCl<sub>3</sub>) δ 10.32 (s, 1H), 7.39 (t, *J* = 8.3 Hz, 1H), 6.64 – 6.55 (m, 1H), 6.45 – 6.38 (m, 1H), 1.73 (s, 9H). <sup>13</sup>C NMR (100 MHz, CDCl<sub>3</sub>) δ 165.47, 161.39, 155.56, 137.93, 110.79, 107.25, 107.13, 99.34, 25.64.

**10:** Anhydrous pyridine (1.25 mL) and trifluoromethanesulfonic anhydride (1.05 mL, 6.18 mmol) were successively added to a solution of **9-1** (1 g, 5.15 mmol) in dichloromethane (10 mL). The mixture was allowed to stir at 0 °C for 6h. The solvents were removed in vacuo and the remaining residue was dissolved in EtOAc, and washed with 1 N HCl. and the combined organic layers were washed with brine, dried and concentrated under reduced pressure. The residue was purified by flash column chromatography on silica gel (EtOAc:hexane = 1:6) to afford **10**<sup>10</sup> as a white solid (1.63 g, 97%). mp 110–113 °C, R<sub>f</sub> = 0.5 (Petroleum ether /EtOAc 10:1). <sup>1</sup>H NMR (400 MHz,



CDCl<sub>3</sub>)  $\delta$  7.62 (t,  $J$  = 8.3 Hz, 1H), 7.12 – 7.04 (m, 1H), 7.01 (d,  $J$  = 8.2 Hz, 1H), 1.77 (s, 9H). <sup>13</sup>C NMR (100 MHz, CDCl<sub>3</sub>)  $\delta$  157.43, 157.10, 148.63, 136.26, 120.34, 117.89, 117.15, 116.55, 108.31, 106.88, 25.51.

**10-1:** To a solution of **10** (500 mg, 1.53 mmol) in anhydrous THF (5 ml) was added CuI (15 mg, 0.075 mmol), PdCl<sub>2</sub>(PPh<sub>3</sub>)<sub>2</sub> (55 mg, 0.075 mmol), *i*-Pr<sub>2</sub>NEt (1.21 ml, 7.3 mmol) and trimethylsilylacetylene (0.44 ml, 3.06 mmol) at rt, and the mixture was stirred vigorously for 24h under Argon atmosphere. The reaction mixture was quenched with saturated aq. NH<sub>4</sub>Cl, extracted with EtOAc, and washed with brine. The organic phase was dried by Na<sub>2</sub>SO<sub>4</sub> and concentrated in vacuo. Purification by flash chromatography (EtOAc/Petroleum ether = 1/20) afforded **10-1<sup>II</sup>** (400 mg, 96%) as a light yellow oil. R<sub>f</sub> = 0.6 (Petroleum ether /EtOAc 10:1). <sup>1</sup>H NMR (400 MHz, CDCl<sub>3</sub>)  $\delta$  7.25 (t,  $J$  = 8.0 Hz, 1H), 7.08 (dd,  $J$  = 7.7, 1.1 Hz, 1H), 6.73 (dd,  $J$  = 8.2, 1.1 Hz, 1H), 1.52 (s, 6H), 0.10 (s, 9H). <sup>13</sup>C NMR (100 MHz, CDCl<sub>3</sub>)  $\delta$  158.59, 156.41, 134.77, 129.22, 124.96, 117.51, 114.30, 105.57, 102.39, 102.27, 25.69, -0.28.

**11:** To a solution of **10-1** (100 mg, 0.36 mmol) in anhydrous THF (2 ml) was added tetrabutylammonium fluoride (1 M in THF, 0.47 ml, 0.47 mmol) at 0 °C under Argon atmosphere. The mixture is stirred for 10 min and the solvents were removed in vacuo. Purification by flash chromatography (EtOAc/Petroleum ether = 1/10) afforded **11<sup>II</sup>** (72 mg, quant) as a white solid. mp 81–83 °C, R<sub>f</sub> = 0.5 (Petroleum ether /EtOAc 10:1). <sup>1</sup>H NMR (400 MHz, CDCl<sub>3</sub>)  $\delta$  7.48 (t,  $J$  = 8.0 Hz, 1H), 7.33 (dd,  $J$  = 7.7, 1.1 Hz, 1H), 6.97 (dd,  $J$  = 8.2, 1.2 Hz, 1H), 3.53 (s, 1H), 1.73 (s, 6H). <sup>13</sup>C NMR (100 MHz, CDCl<sub>3</sub>)  $\delta$  158.81, 156.56, 135.01, 129.70, 124.05, 118.05, 114.55, 105.85, 84.15, 81.13, 25.69. HRMS (ESI):  $m/z$  calcd for C<sub>12</sub>H<sub>10</sub>O<sub>3</sub>Na ([M + Na]<sup>+</sup>): 225.0522, found: 225.0525.

**12:** To a solution of L-furanosyl acetate **8** (43 mg, 0.2 mmol) and ZnBr<sub>2</sub> (9 mg, 20 % mol) in dry THF (1 mL, 0.2 M) was added alkyne **11** (52 mg, 0.26 mmol), *i*-Pr<sub>2</sub>NEt (0.48 mmol, 80  $\mu$ l, 2.4 equiv) and TIPSOTf (0.4 mmol, 107 $\mu$ l, 2 equiv) at rt (20 °C -

25 °C) under Argon atmosphere. The reaction was stirred at rt for 3 h, then silica gel (200 - 300 mesh, 500mg) was added and concentrated *in vacuo* to afford yellow powder, which was purified by flash column chromatography (EtOAc/Petroleum ether = 1/10) afforded **12**<sup>8</sup> (59 mg, 83%) as a colorless oil. Rf = 0.35 (Petroleum ether /EtOAc 10:1). <sup>1</sup>H NMR (400 MHz, CDCl<sub>3</sub>) δ 7.43 (t, *J* = 8.0 Hz, 1H), 7.25 – 7.15 (m, 1H), 6.96 – 6.88 (m, 1H), 5.07 (dd, *J* = 6.3, 2.4 Hz, 1H), 4.89 (d, *J* = 2.4 Hz, 1H), 4.57 (dd, *J* = 6.3, 2.4 Hz, 1H), 4.25 (dd, *J* = 6.8, 2.4 Hz, 1H), 1.69 (s, 6H), 1.51 (s, 3H), 1.42 (d, *J* = 6.8 Hz, 3H), 1.33 (s, 3H). <sup>13</sup>C NMR (100 MHz, CDCl<sub>3</sub>) δ 158.68, 156.53, 134.95, 128.71, 124.37, 117.74, 114.15, 113.57, 105.73, 94.02, 86.65, 86.40, 84.16, 82.53, 74.66, 26.86, 25.76, 25.63, 25.25, 19.39. HRMS (ESI): *m/z* calcd for C<sub>20</sub>H<sub>22</sub>O<sub>6</sub>Na ([M + Na]<sup>+</sup>): 381.1309, found: 381.1308.

## 4 References

1. (a) Hosseyni, S.; Smith, C. A.; Shi, X. *Org. Lett.* **2016**, *18*, 6336-6339; (b) Li, C. K.; Mo, F. Y.; Li, W. B.; Wang, J. B. *Tetrahedron Lett.* **2009**, *50*, 6053-6056.
2. (a) Maity, P.; Srinivas, H. D.; Watson, M. P. *J. Am. Chem. Soc.* **2011**, *133*, 17142-17145; (b) Srinivas, H. D.; Maity, P.; Yap, G. P.; Watson, M. P. *J. Org. Chem.* **2015**, *80*, 4003-4016.
3. Kusunuru, A. K.; Tatina, M.; Yousuf, S. K.; Mukherjee, D. *Chem. Commun.* **2013**, *49*, 10154-10156.

4. Nan, G.; Zhou, J. *Lett. Org. Chem.* **2013**, *10*, 555-561.
5. Haidzinskaya, T.; Kerchner, H. A.; Liu, J.; Watson, M. P. *Org. Lett.* **2015**, *17*, 3857-3859.
6. Ren, K.; Li, P.; Wang, L.; Zhang, X. *Tetrahedron.* **2011**, *67*, 2753-2759.
7. Chen, H.; Luo, X.; Qiu, S.; Sun, W.; Zhang, J. *Glycoconj J.* **2017**, *34*, 13-20.
8. Zeng, J.; Vedachalam, S.; Xiang, S. H.; Liu, X. W. *Org. Lett.* **2011**, *13*, 42-45.
9. Tatina, M. B.; Kusunuru, A. K.; Yousuf, S. K.; Mukherjee, D. *Org. Biomol. Chem* **2014**, *12*, 7900-7903.
10. Rountree, J. S. S.; Murphy, P. V. *Org. Lett.* **2009**, *11*, 871-874.
11. Molander, G. A.; Dehmel, F. *J. Am. Chem. Soc.* **2004**, *126*, 10313-10318.

# 5 NMR Spectra of Products

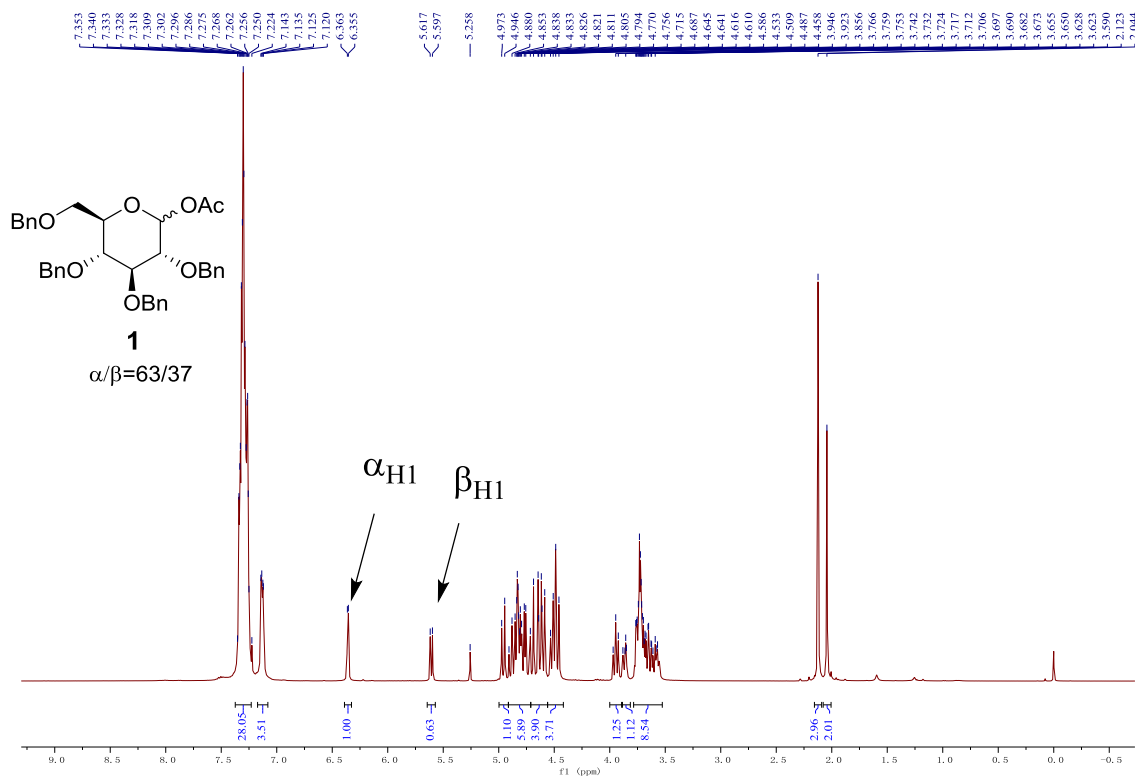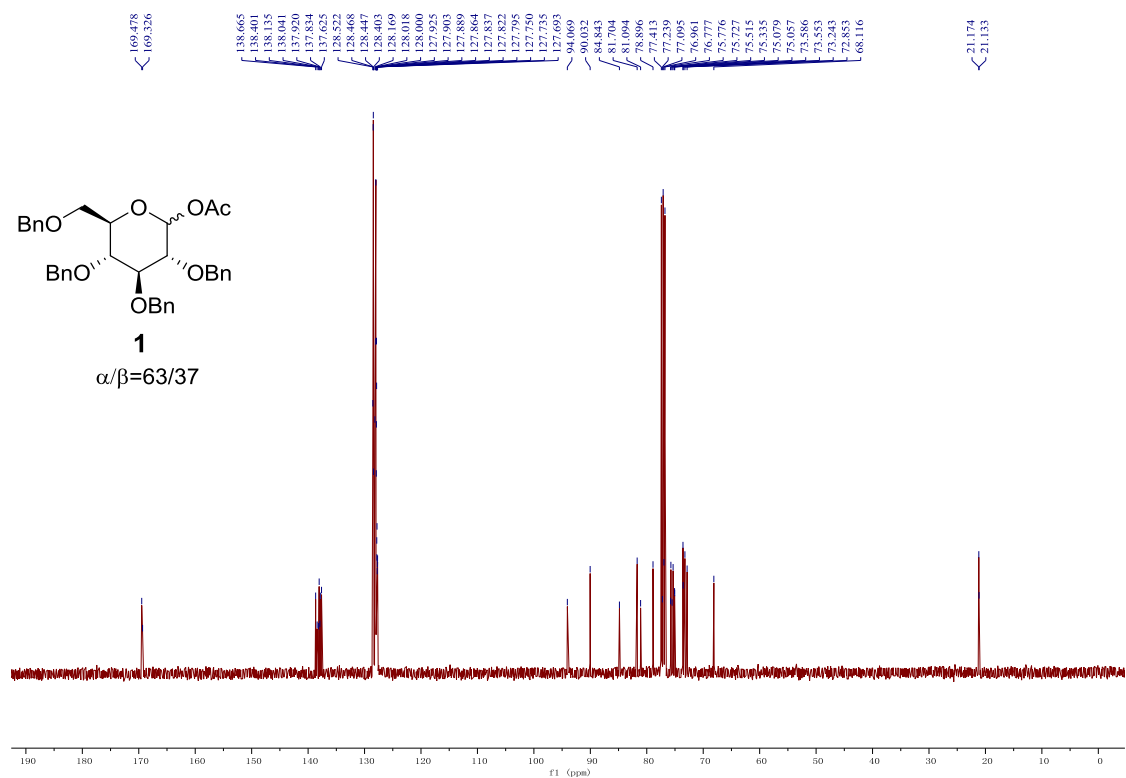

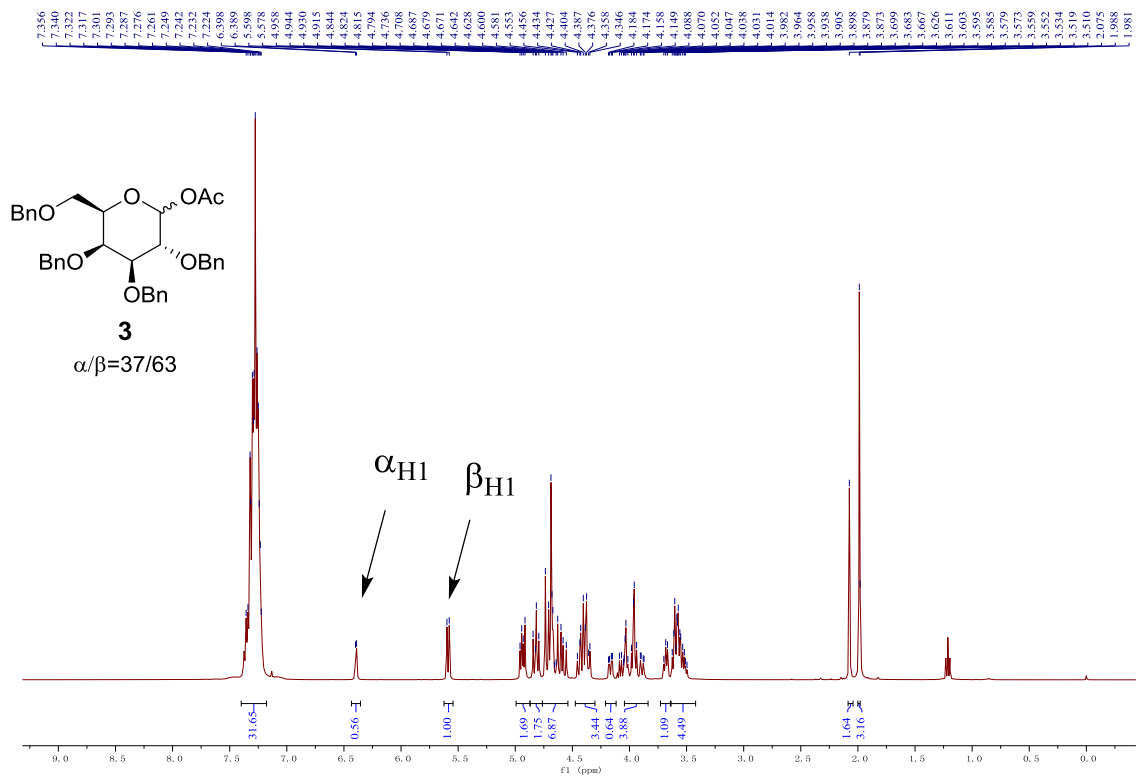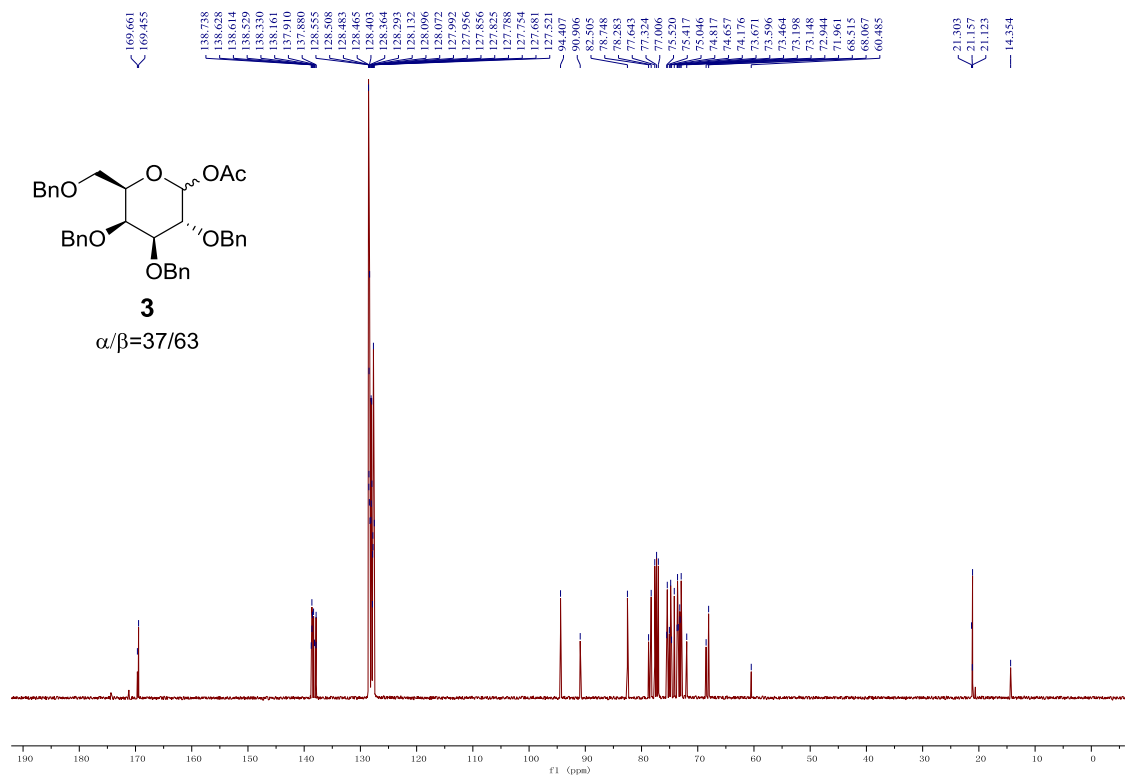

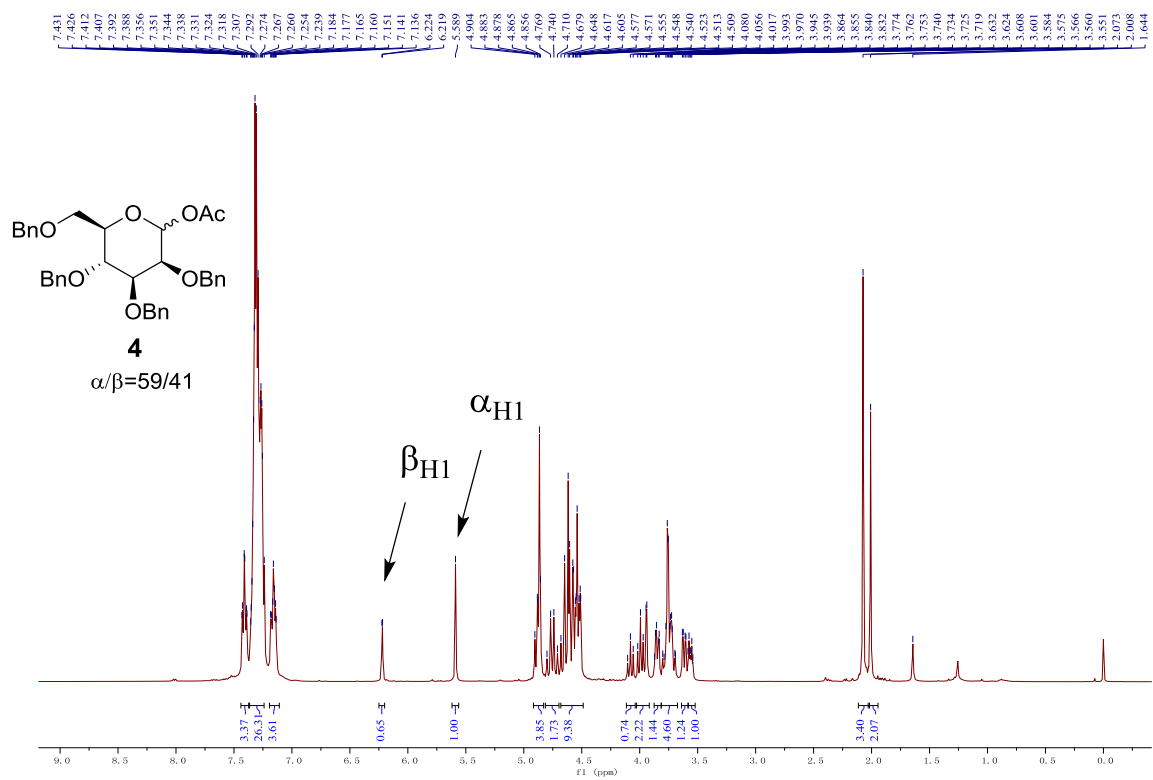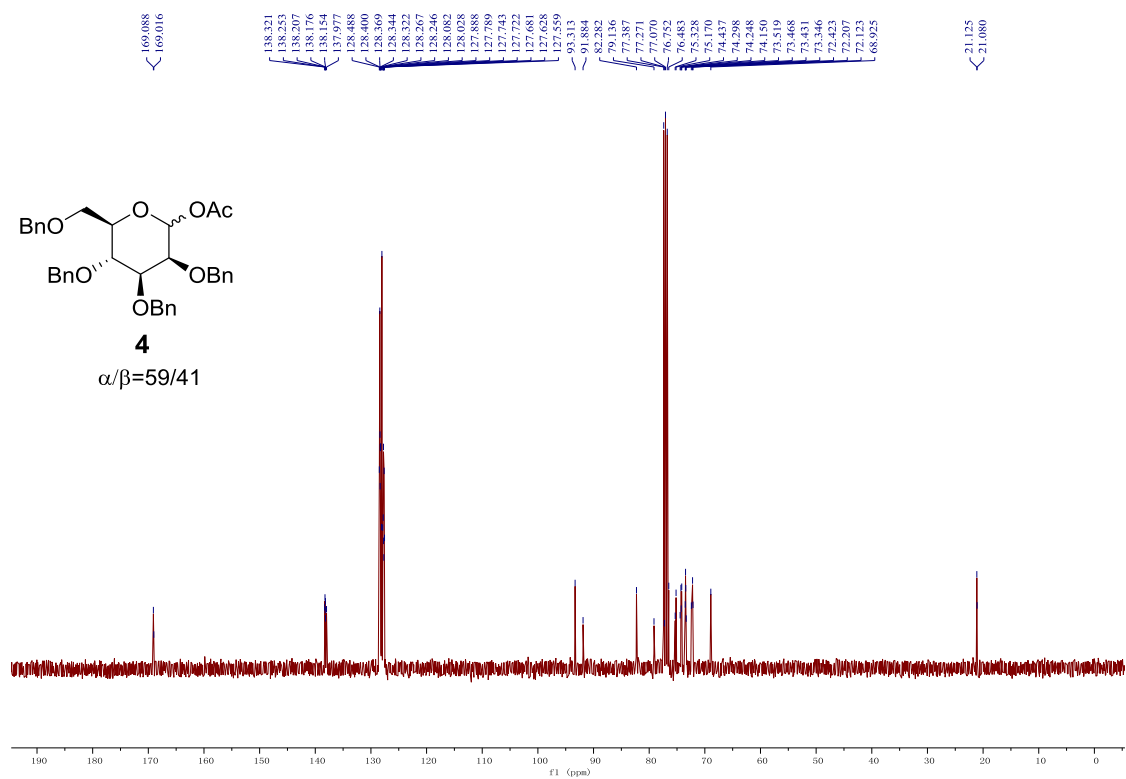



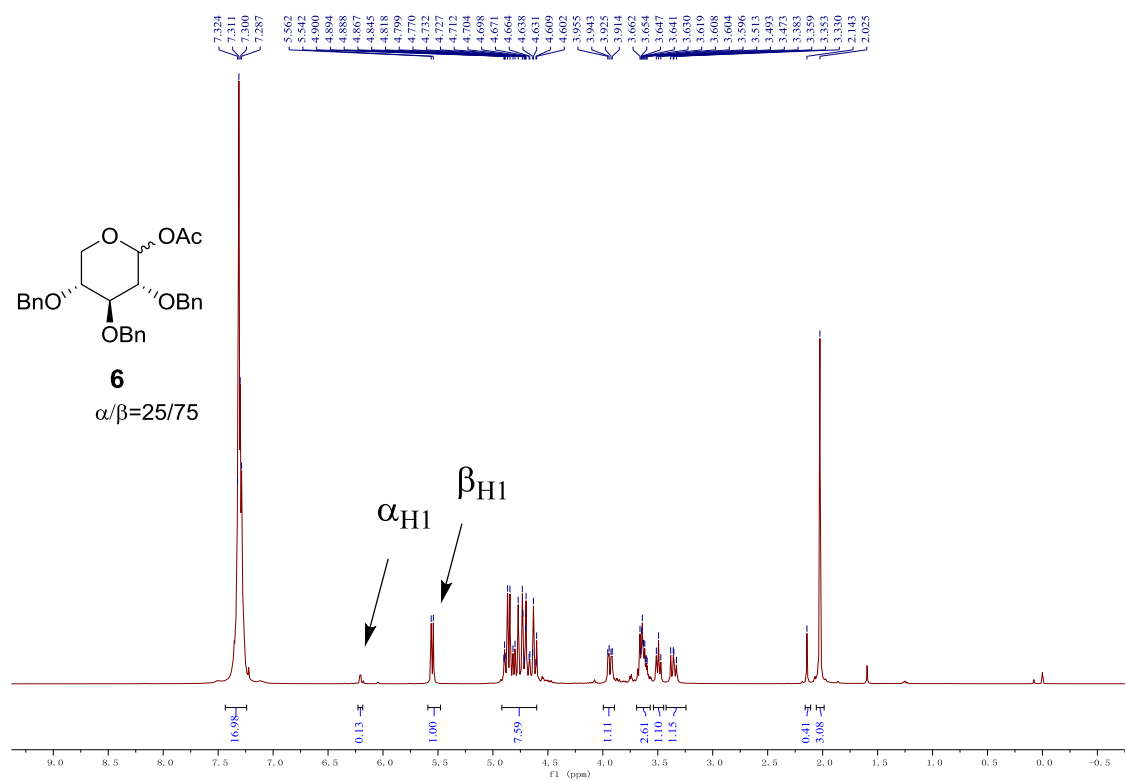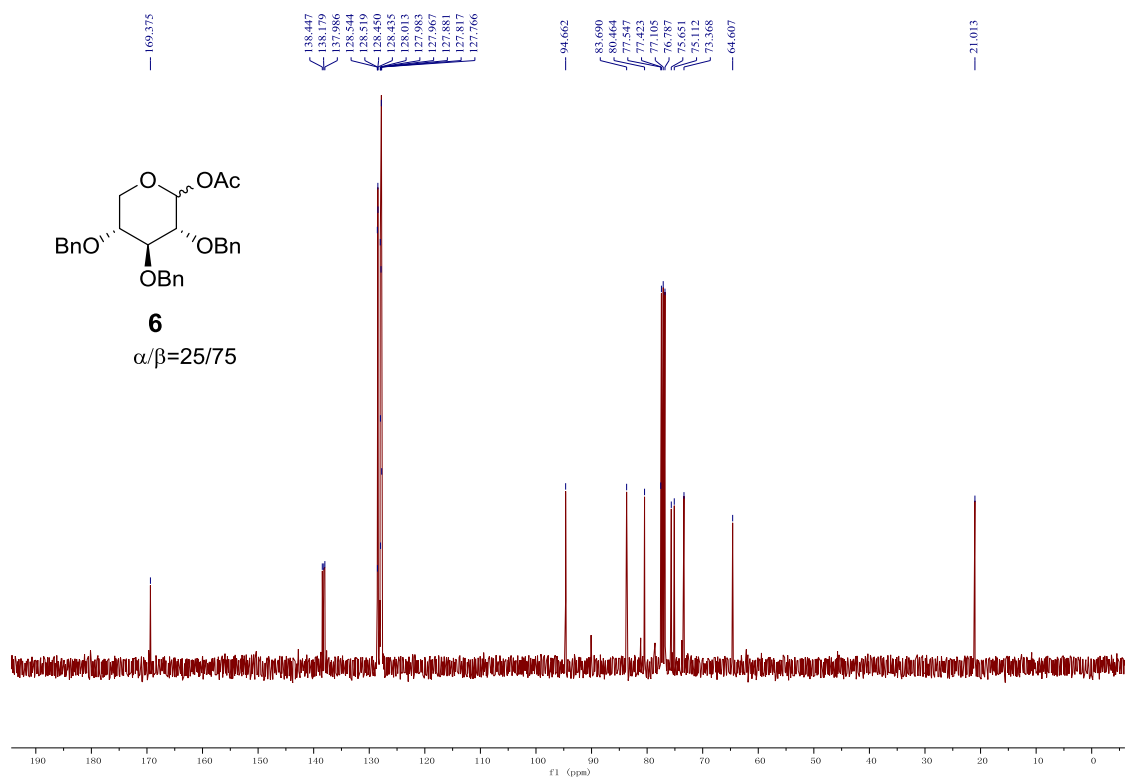



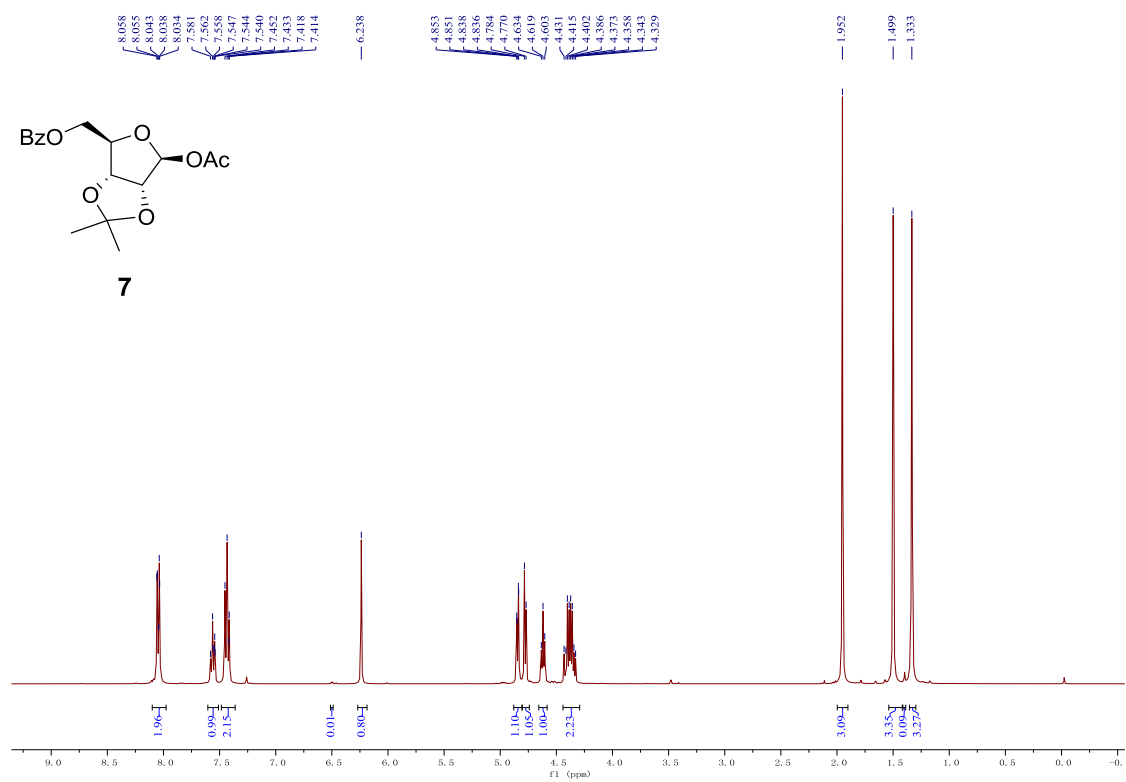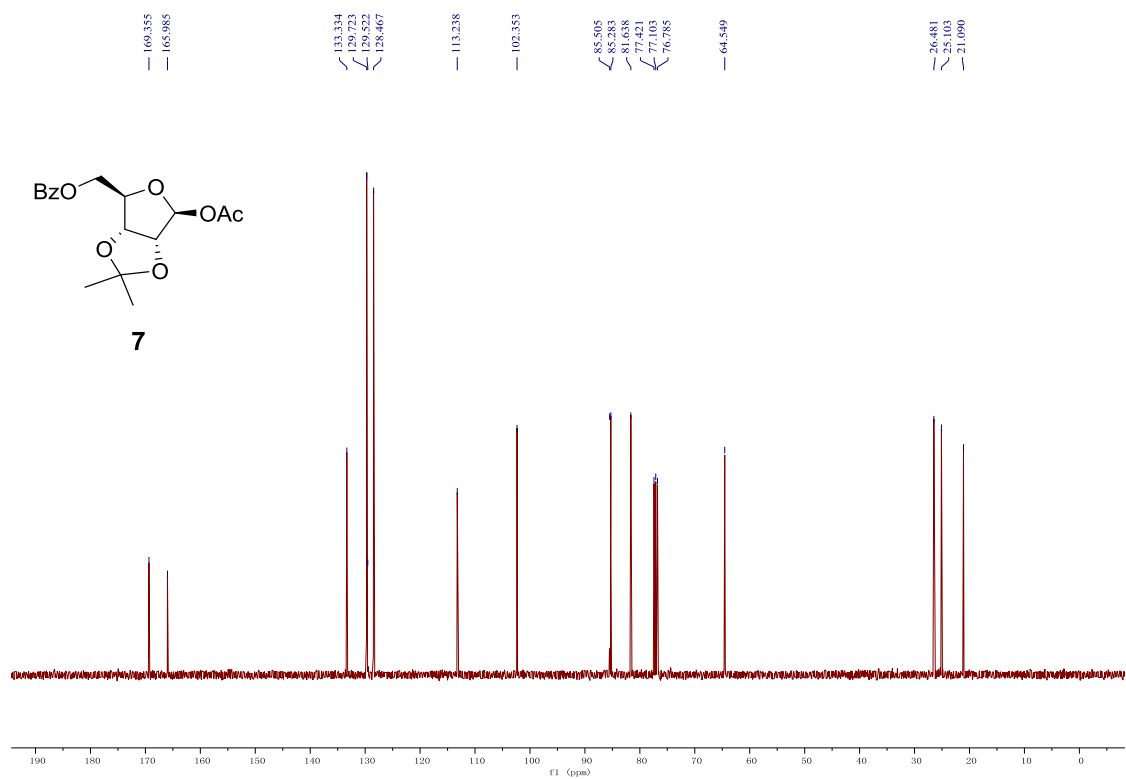

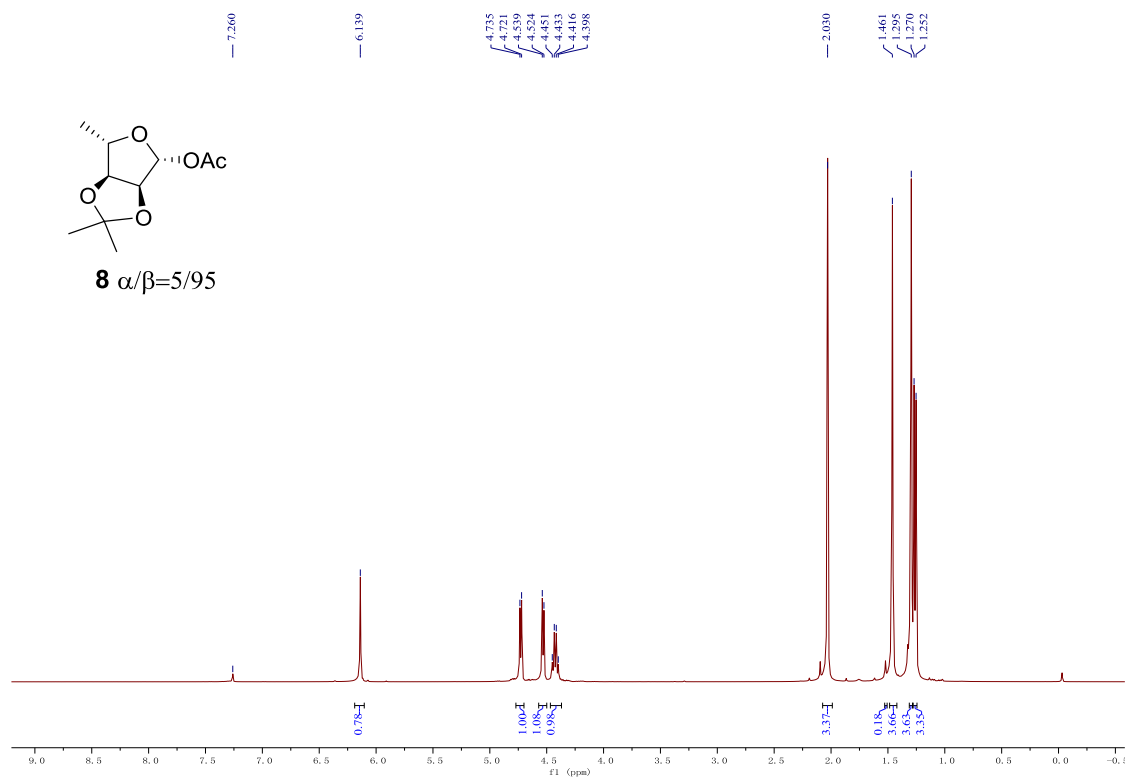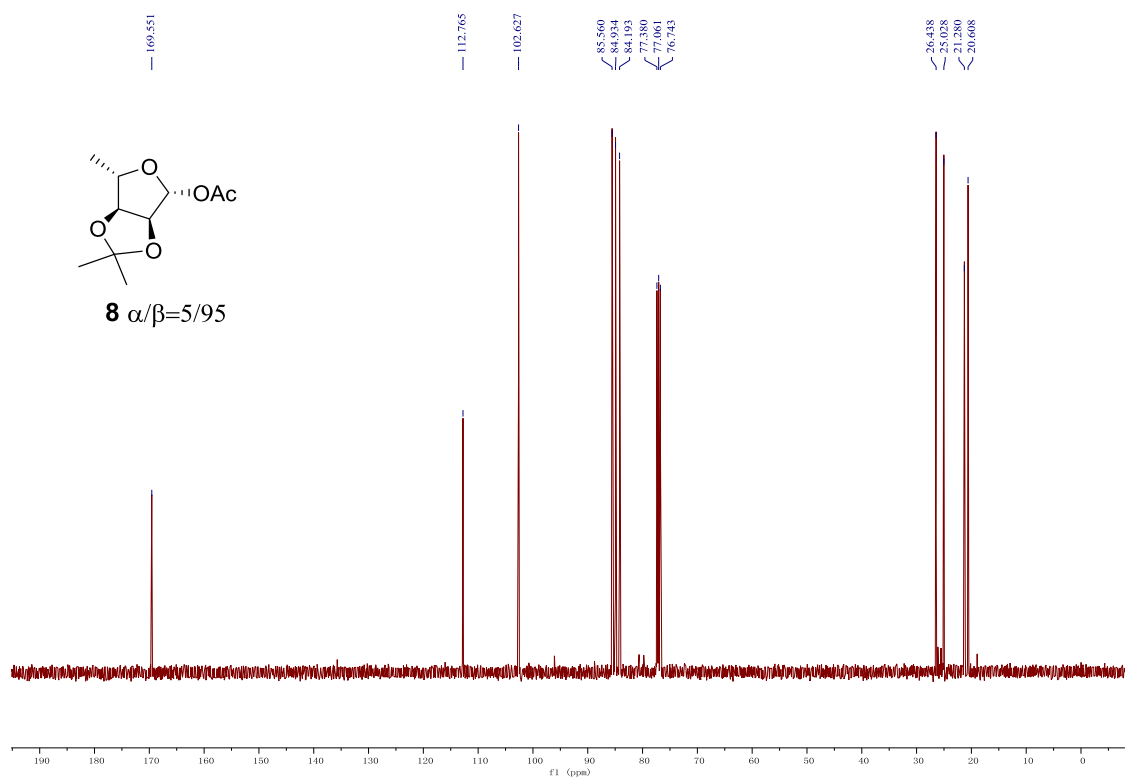

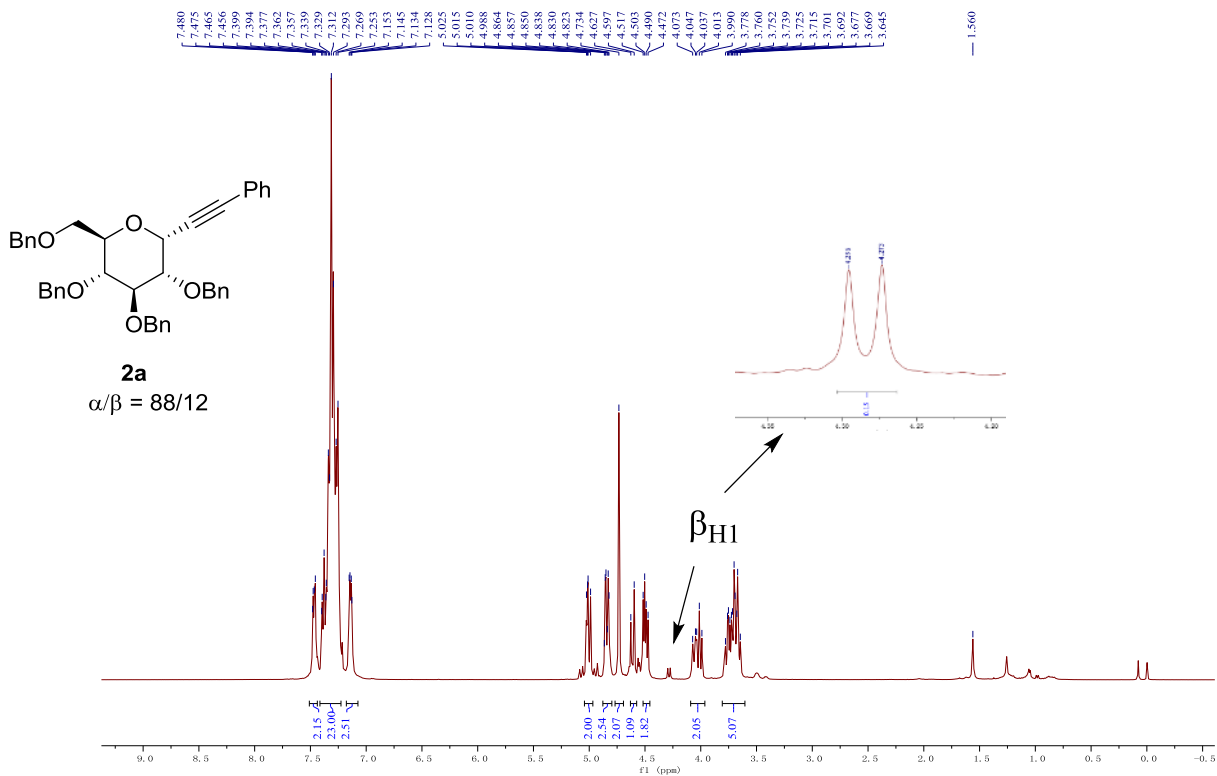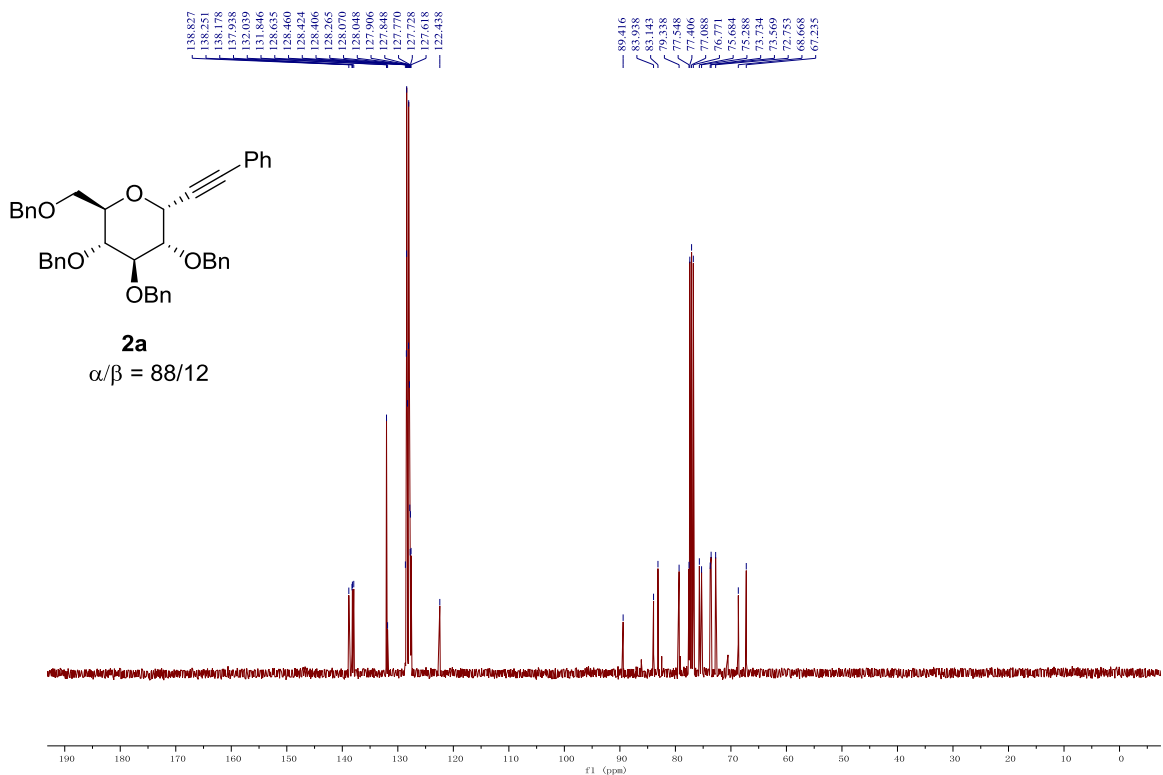

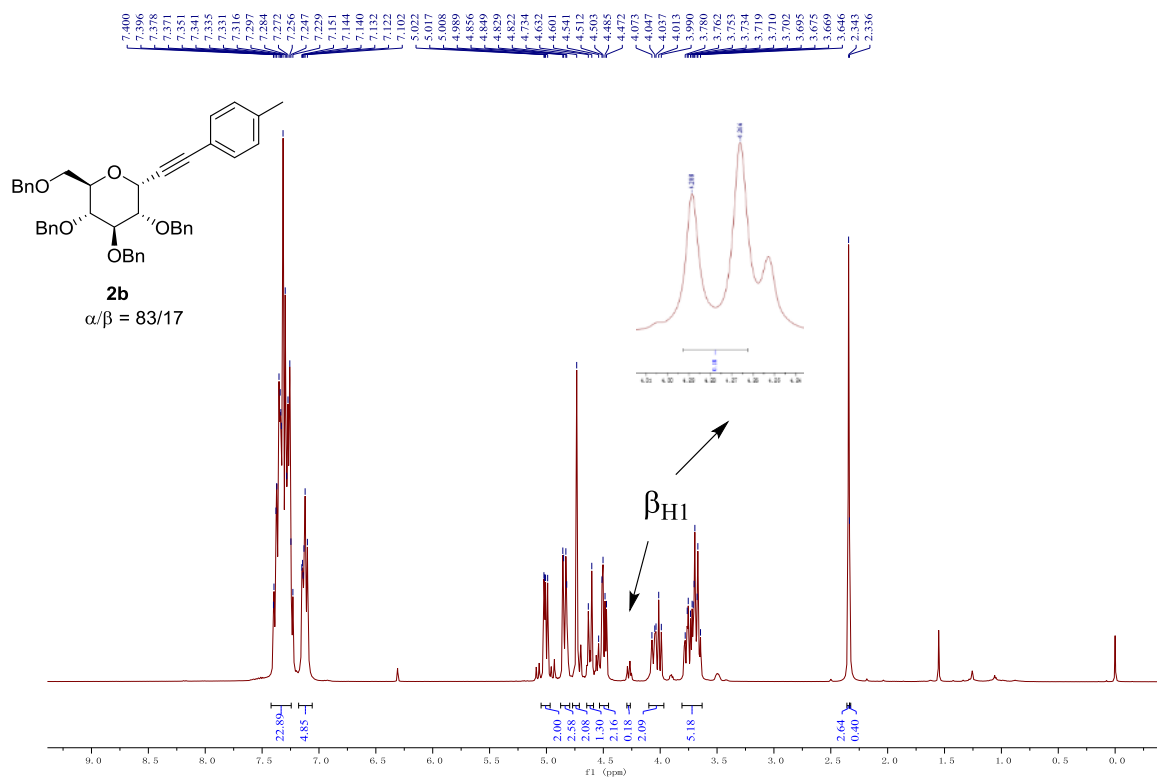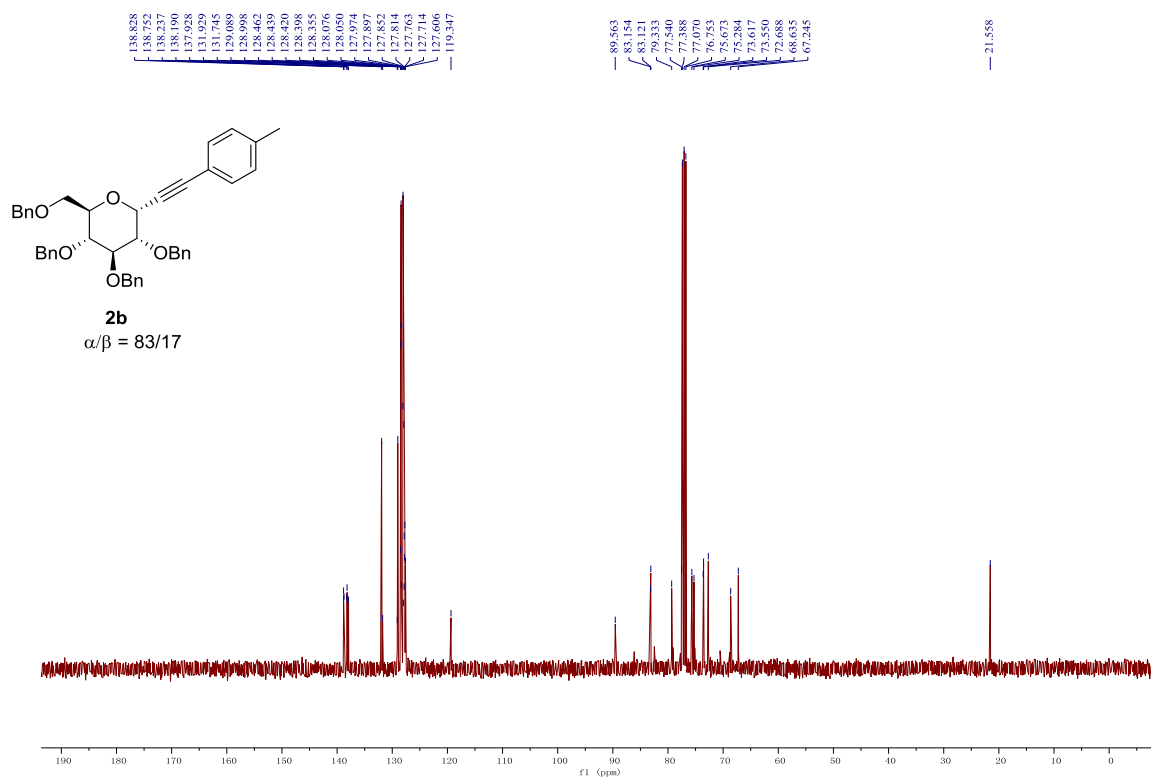

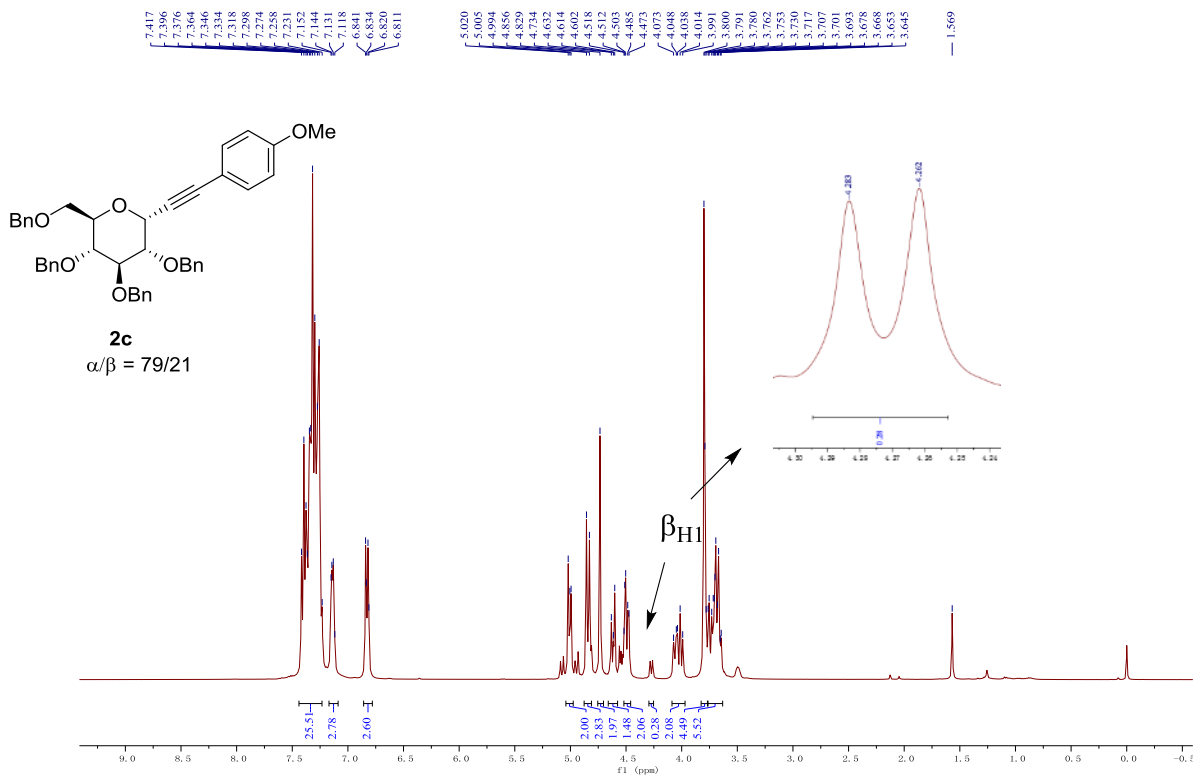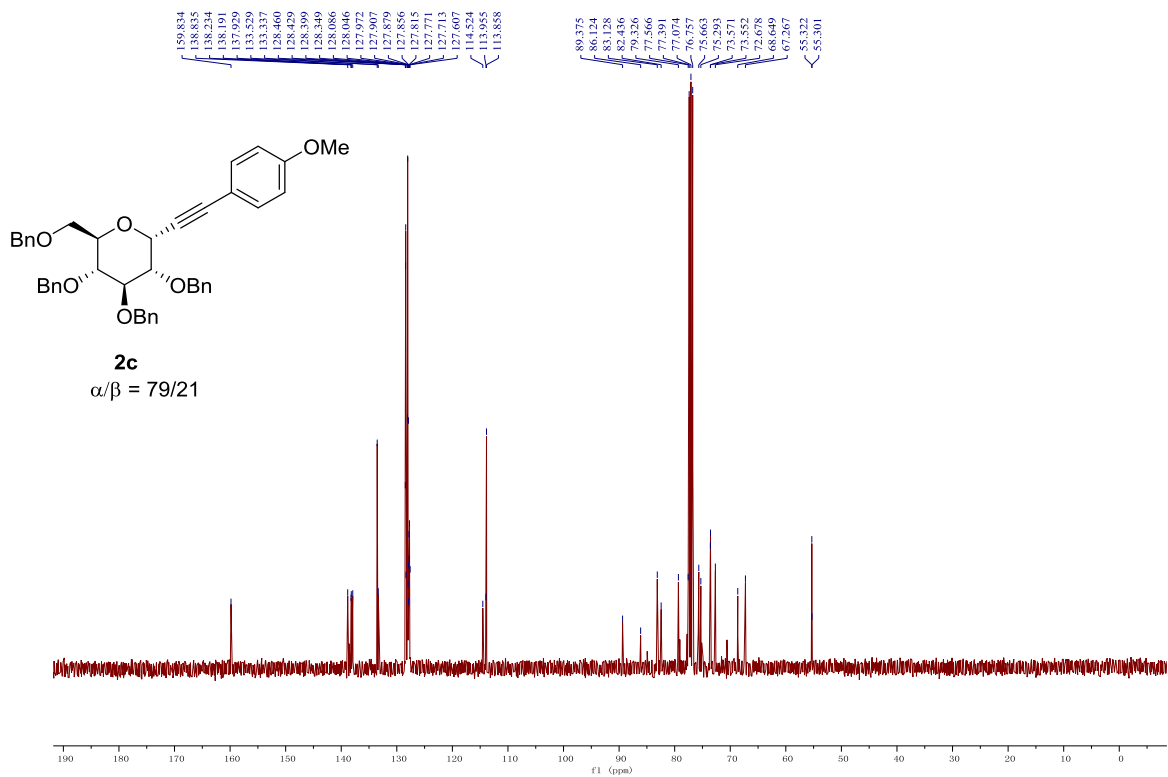

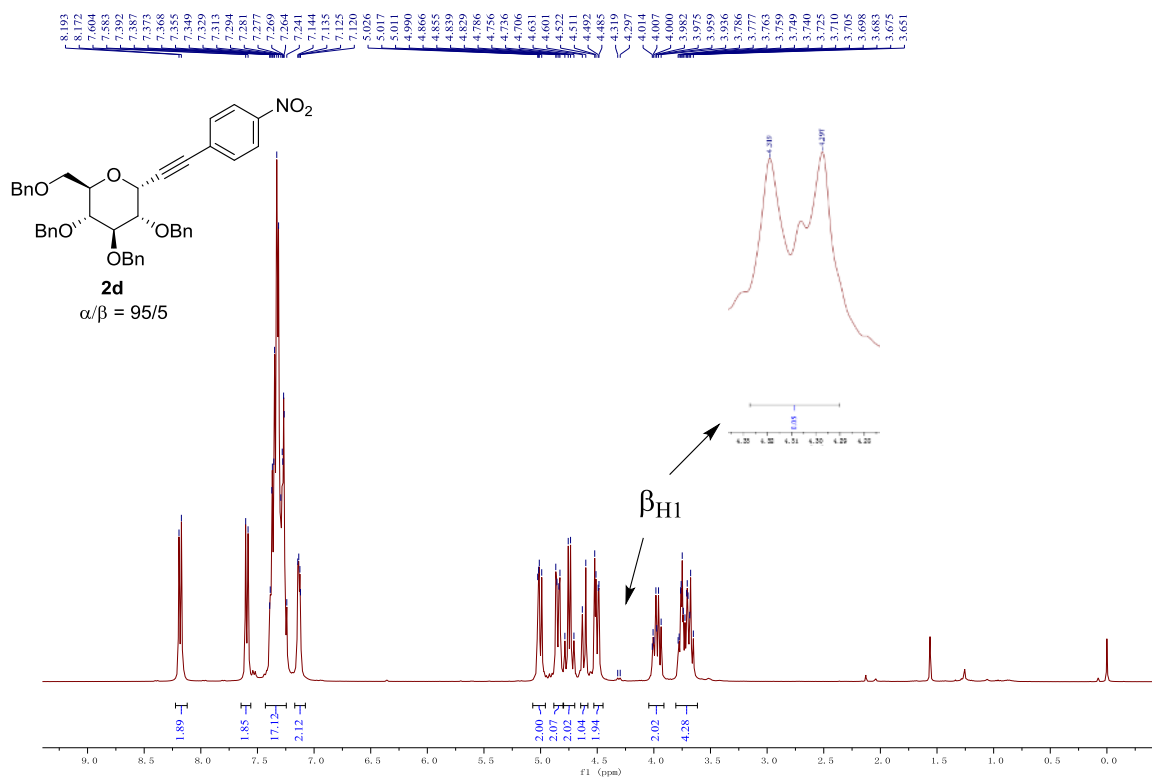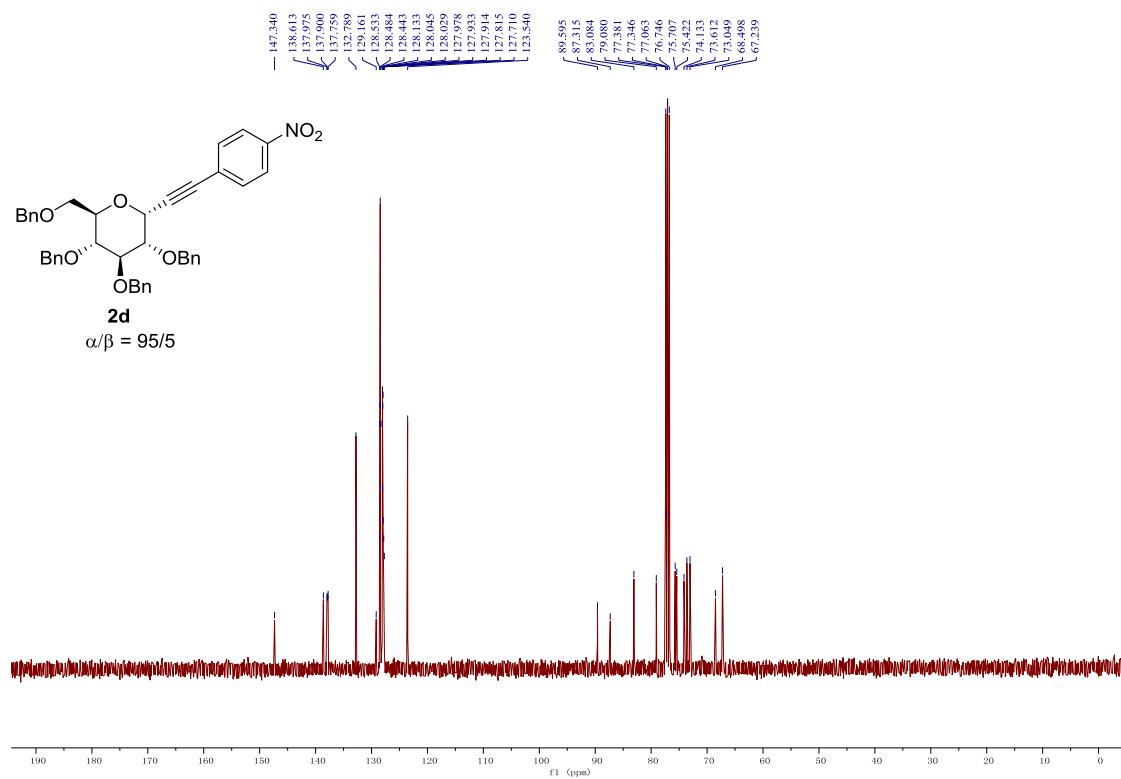

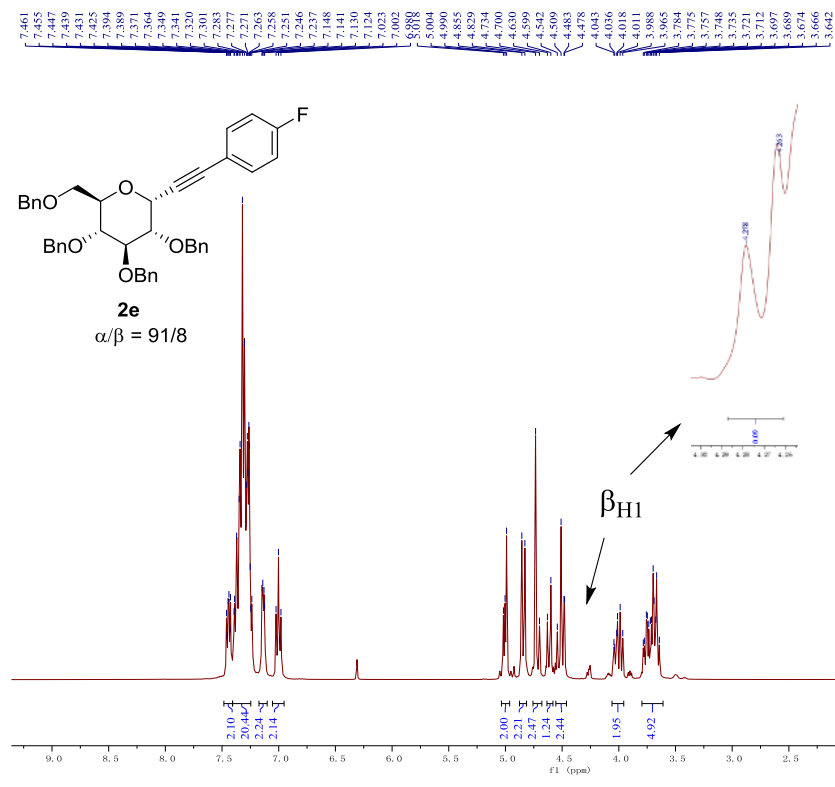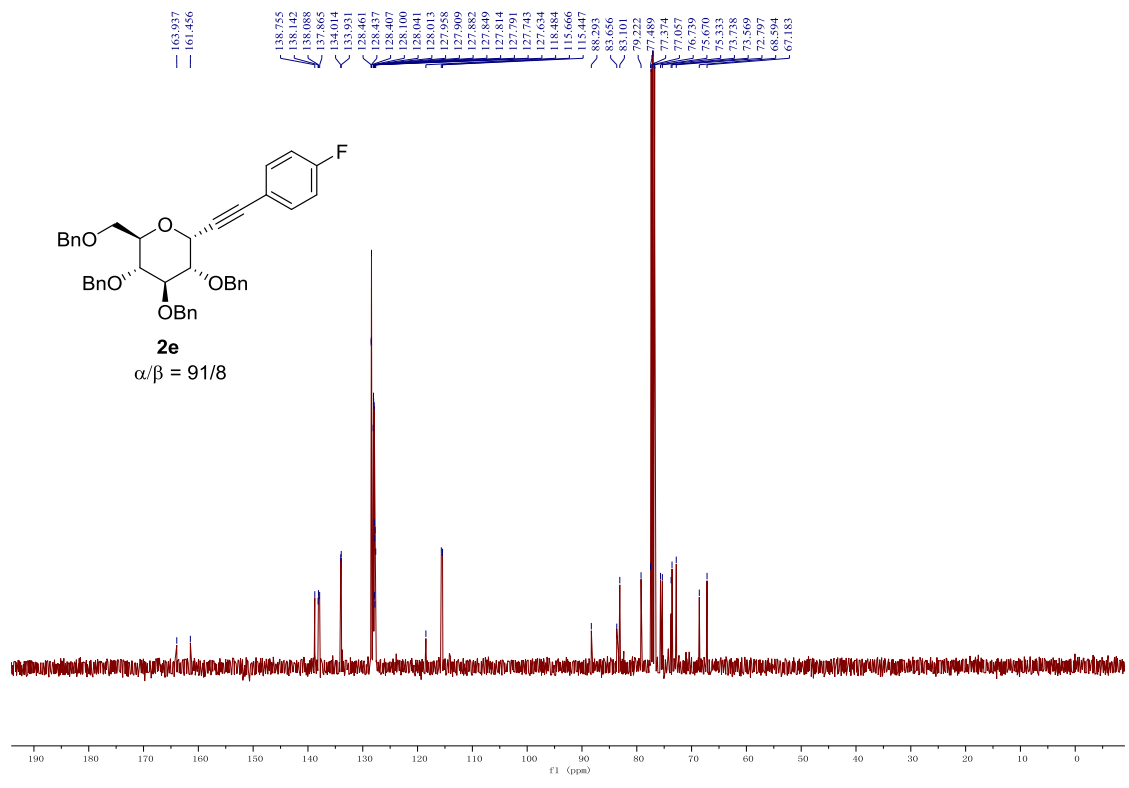

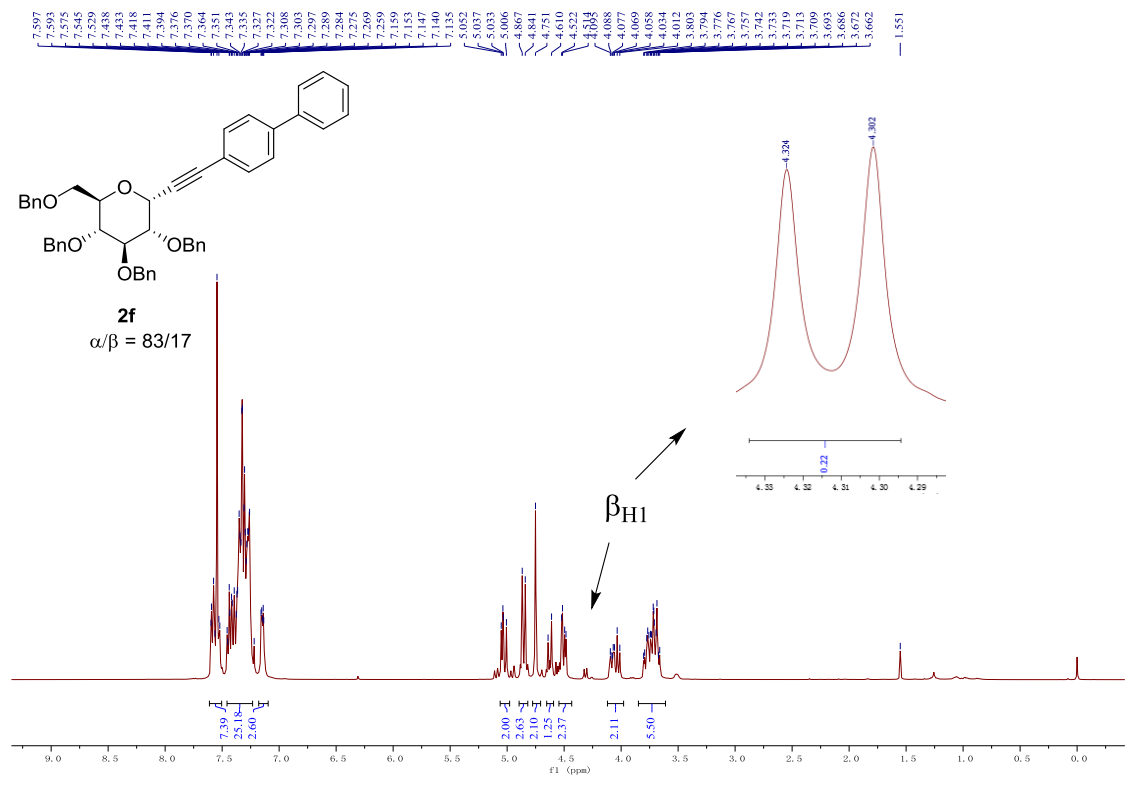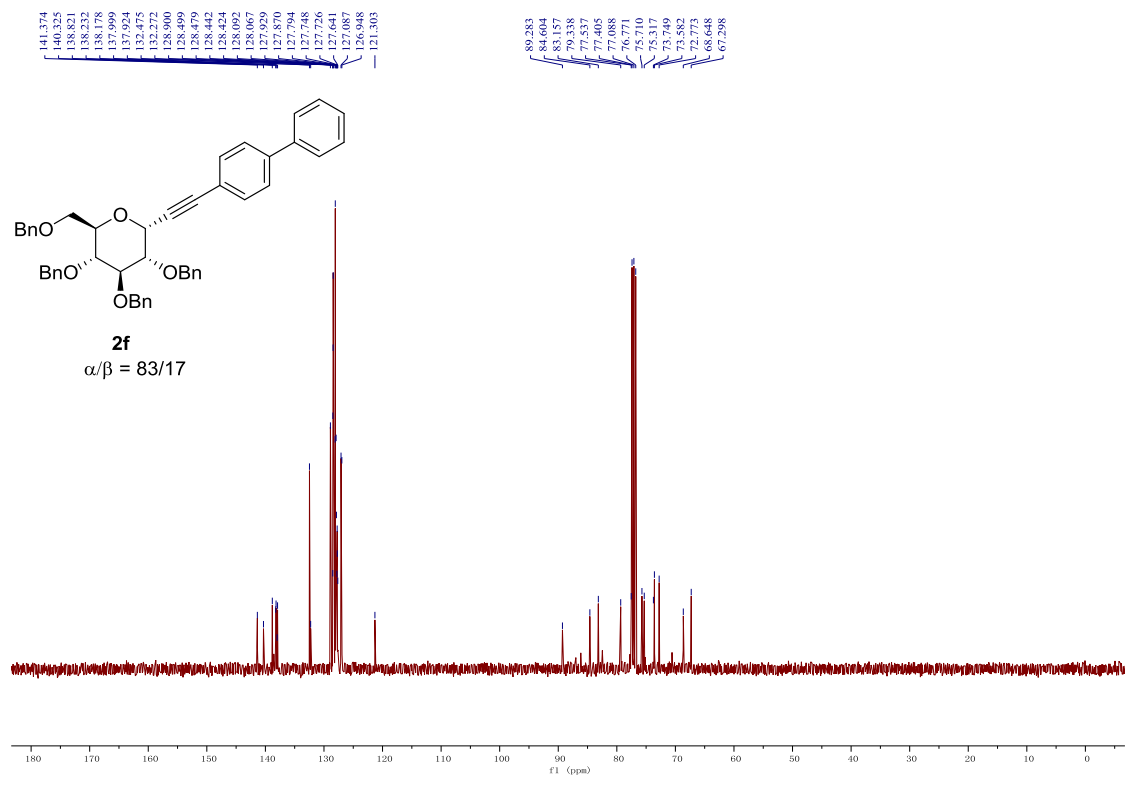



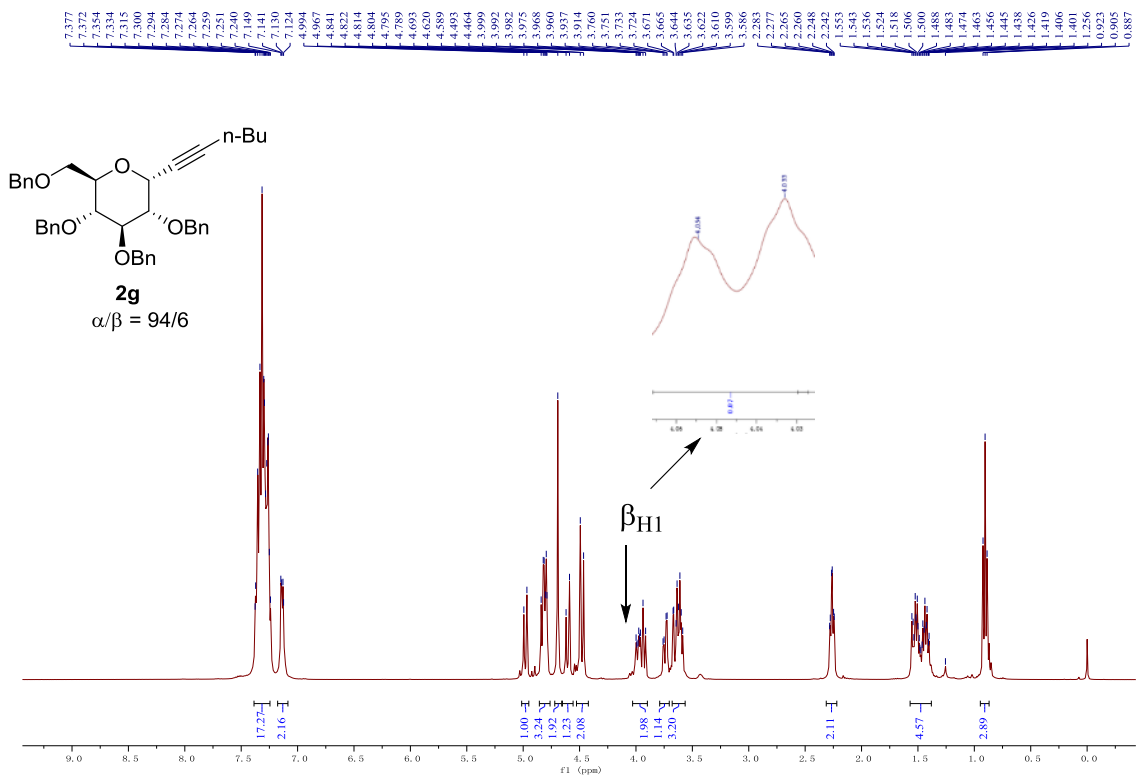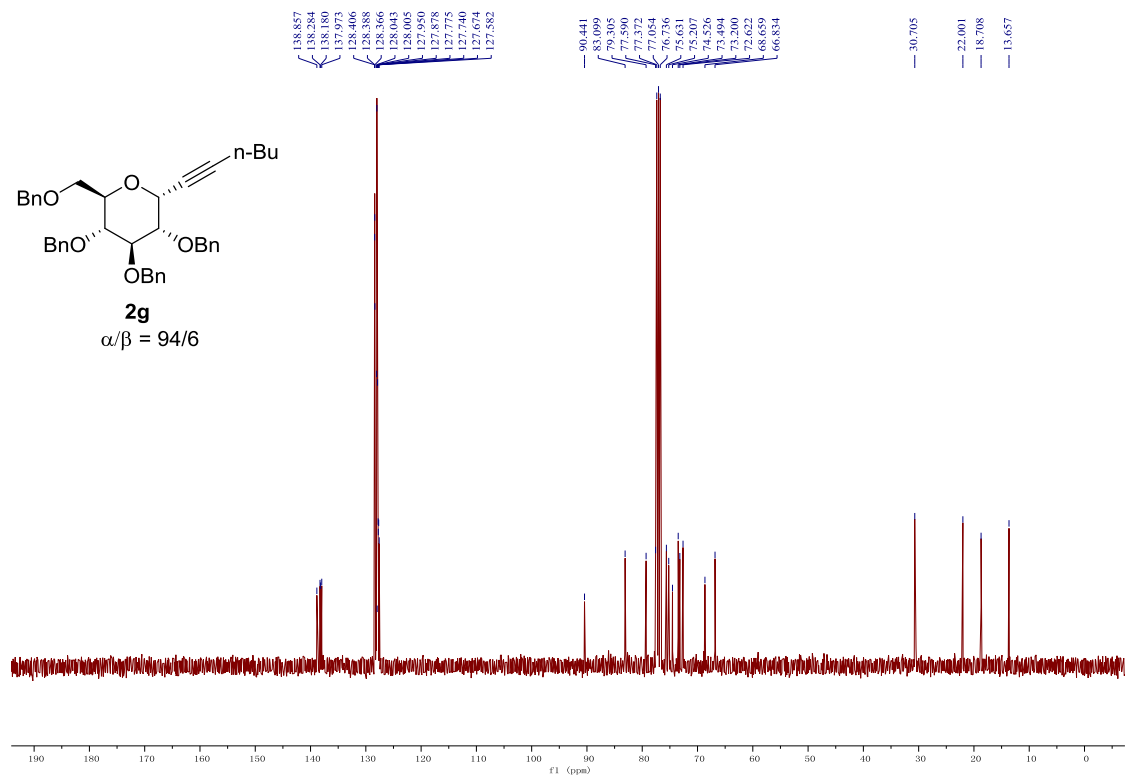

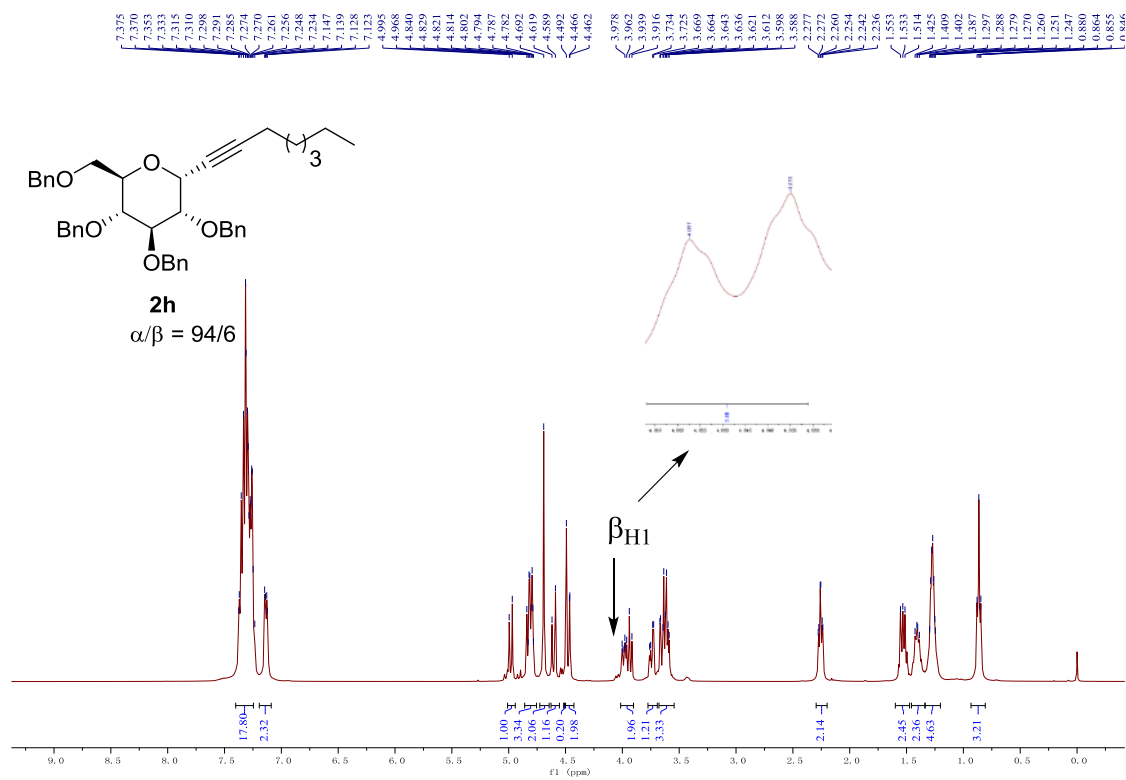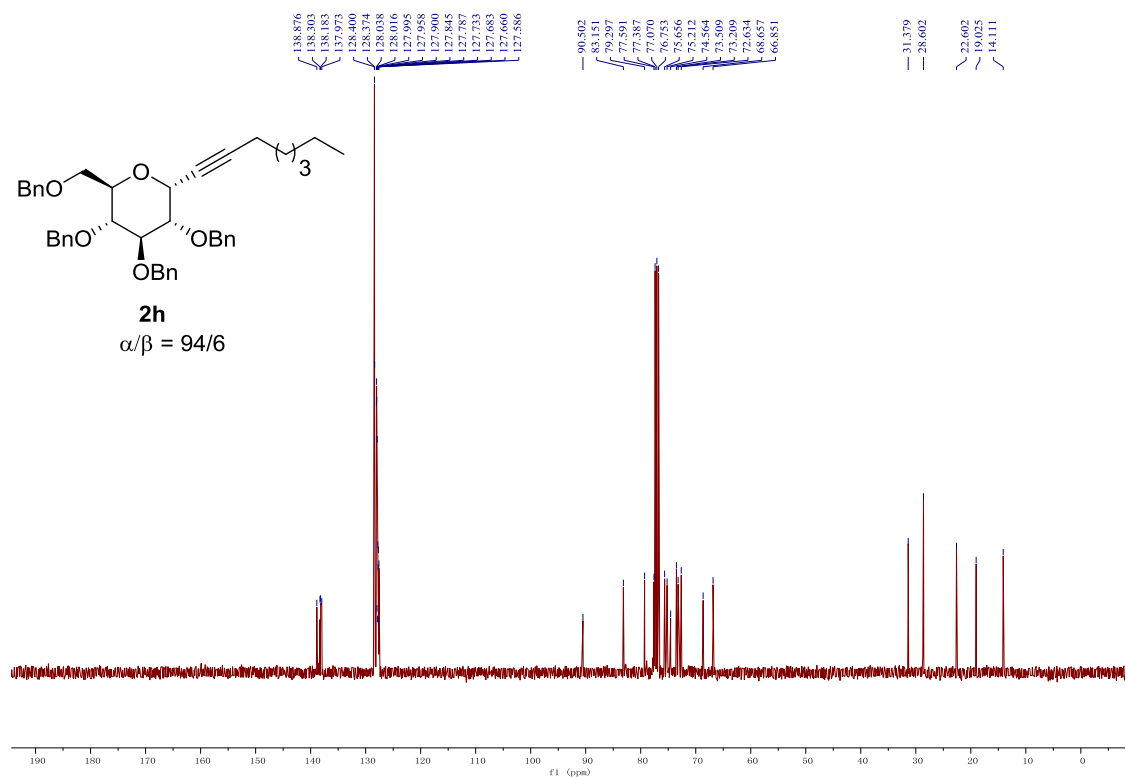

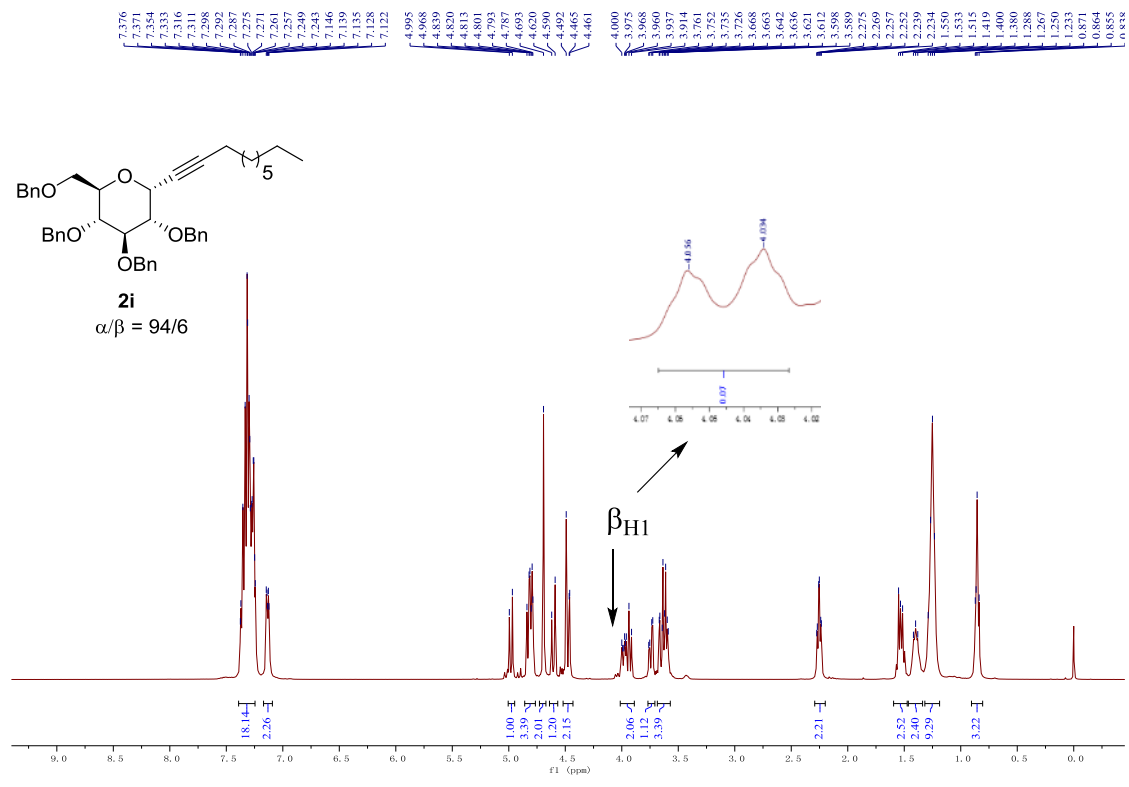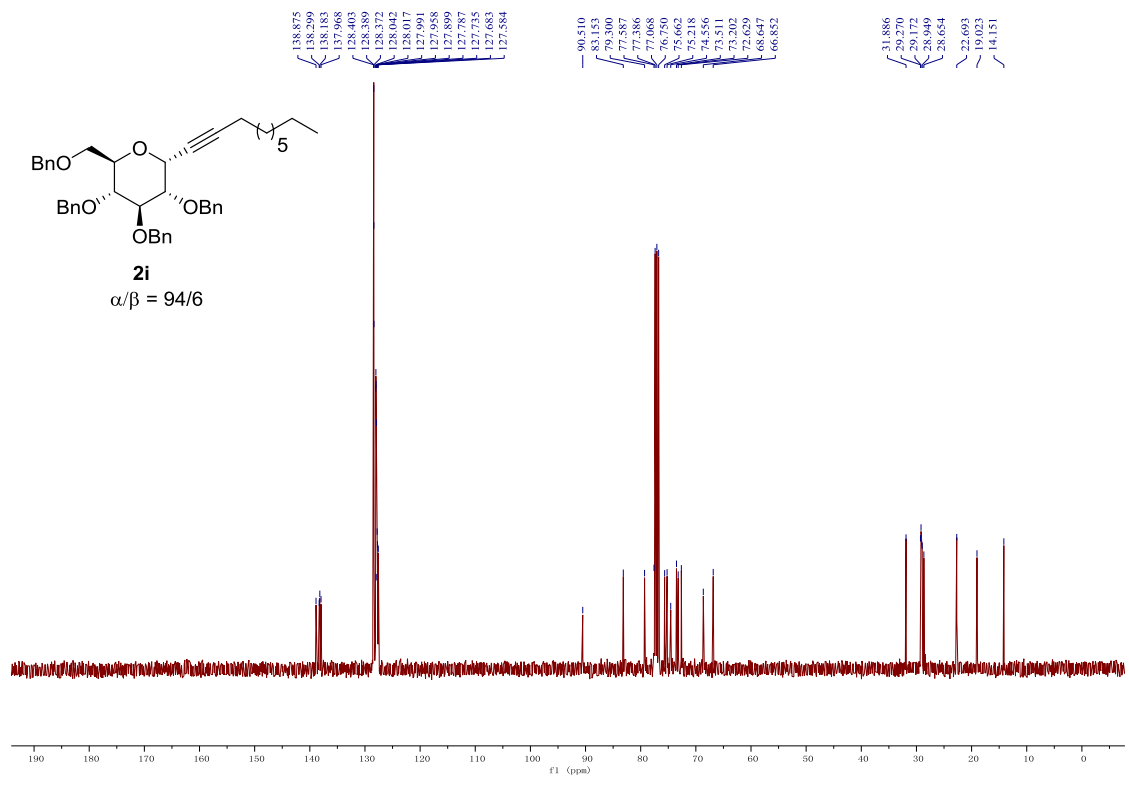

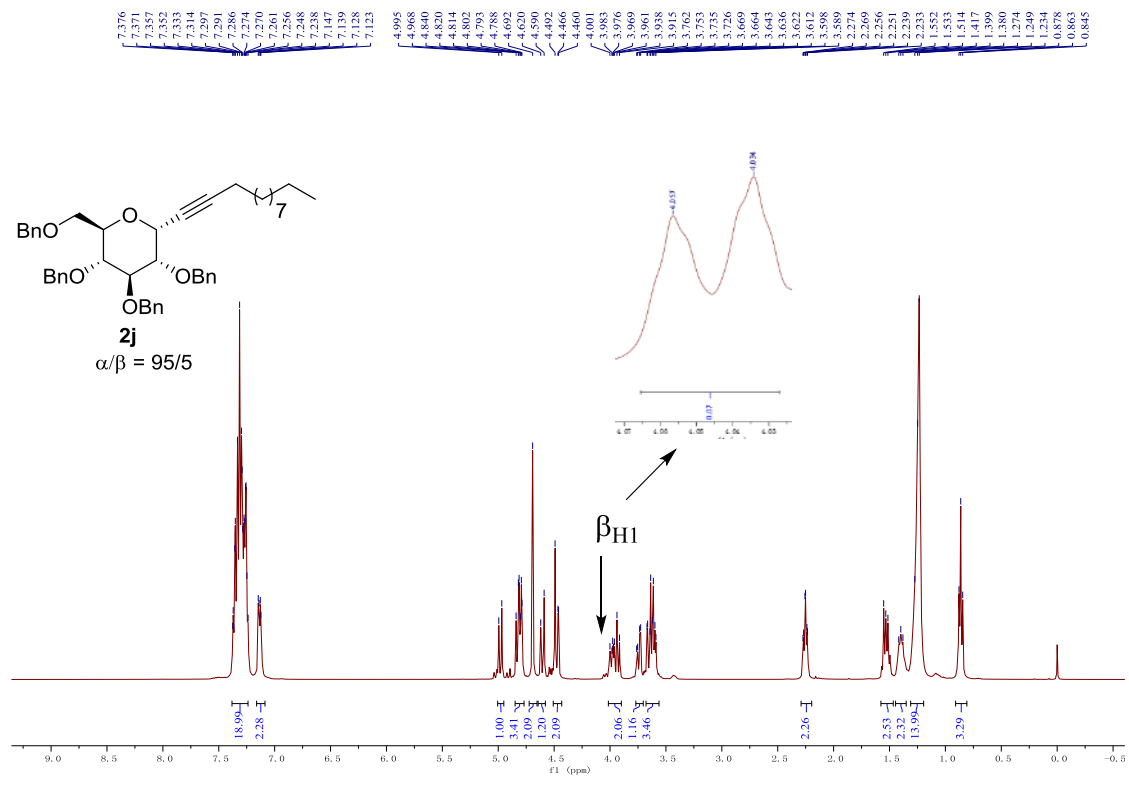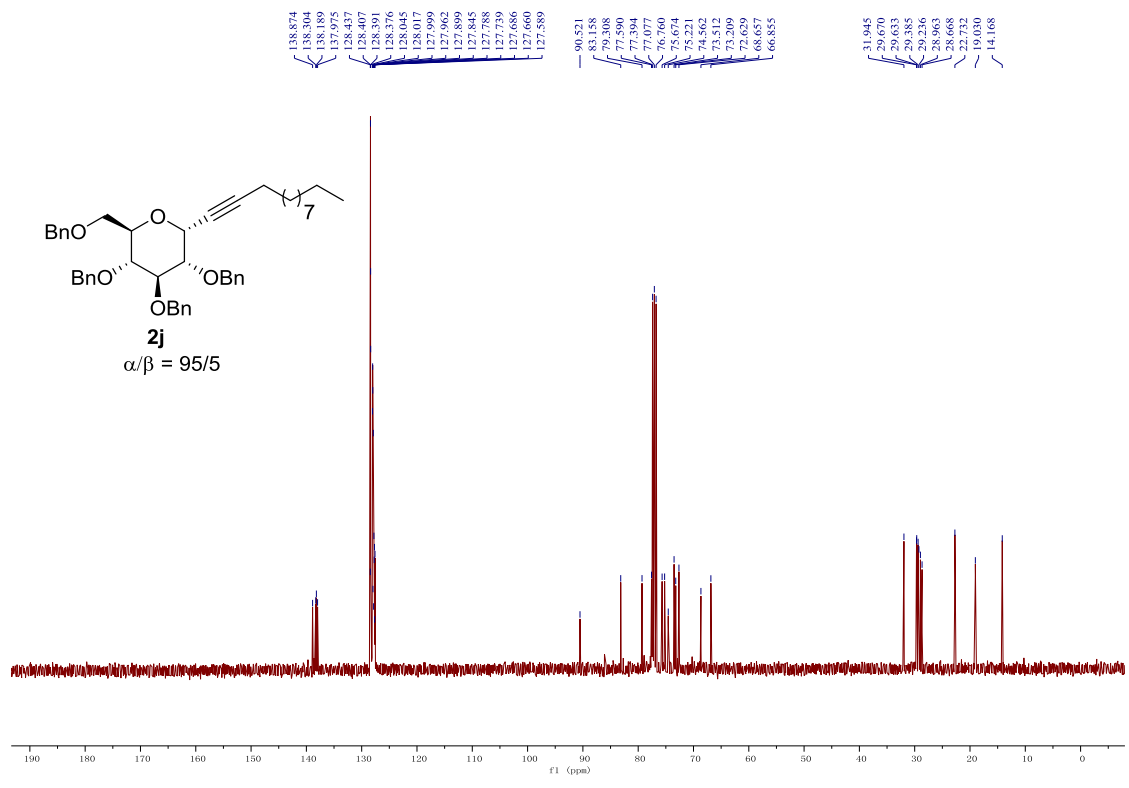

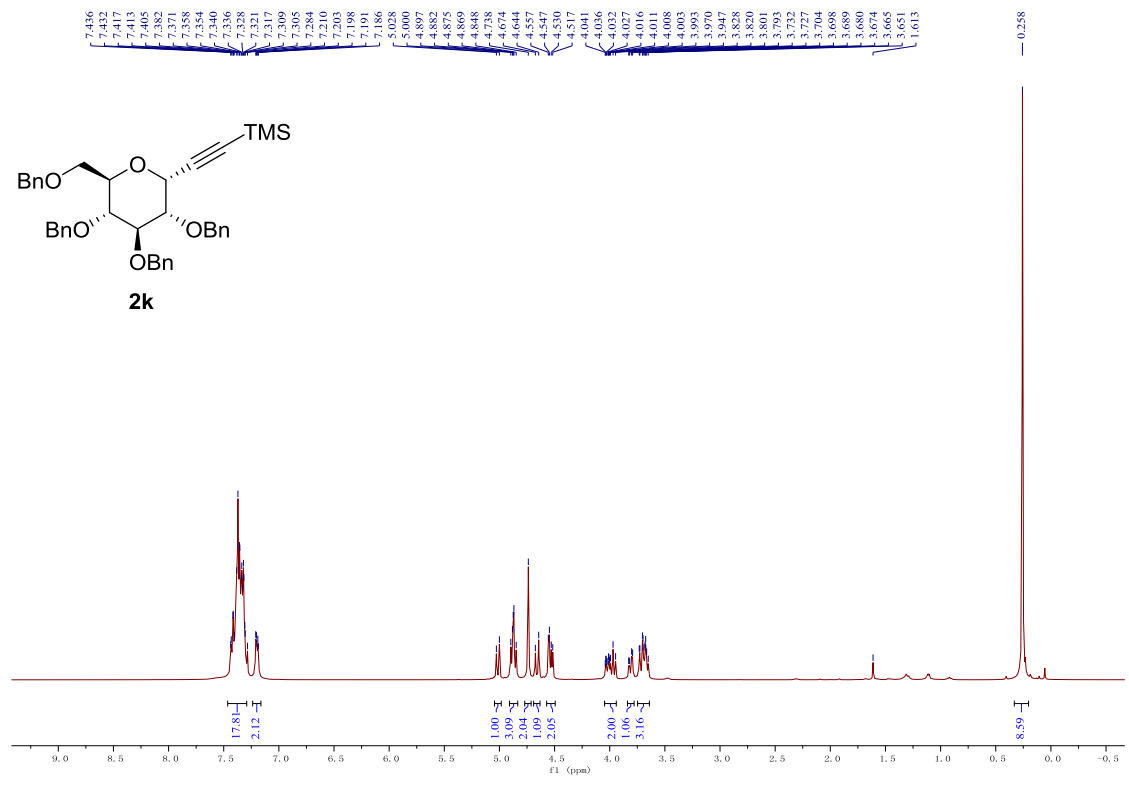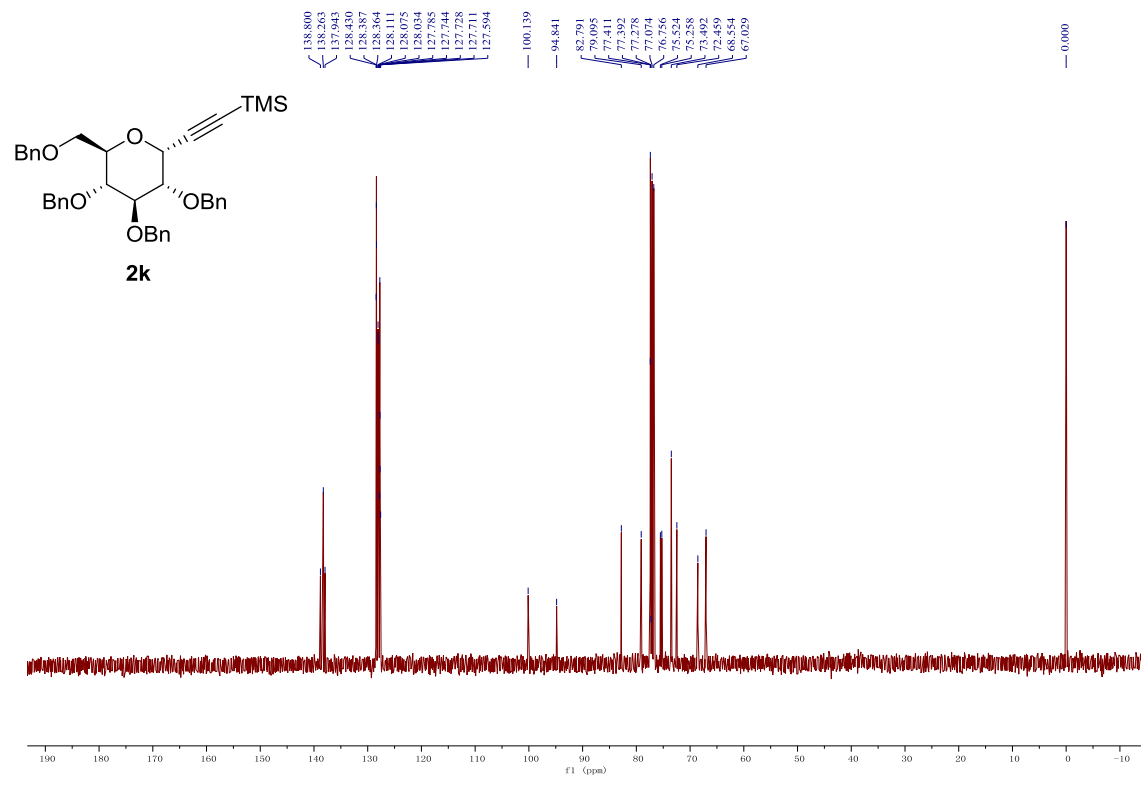

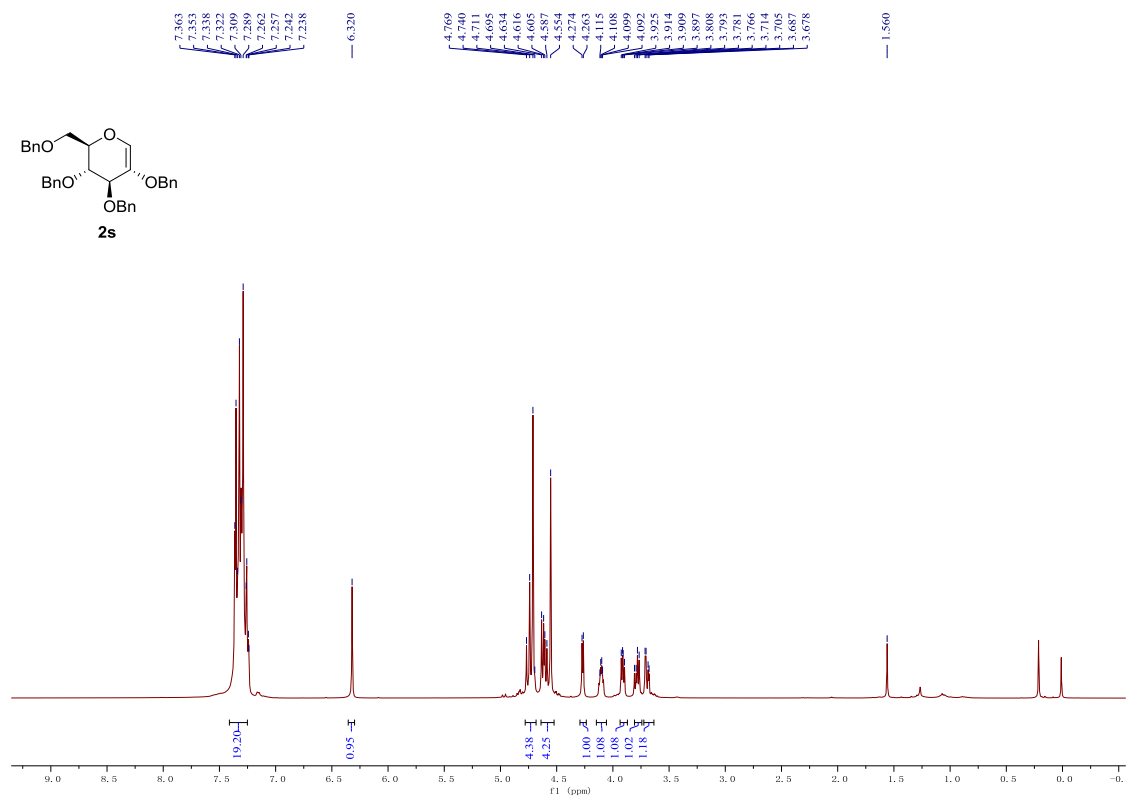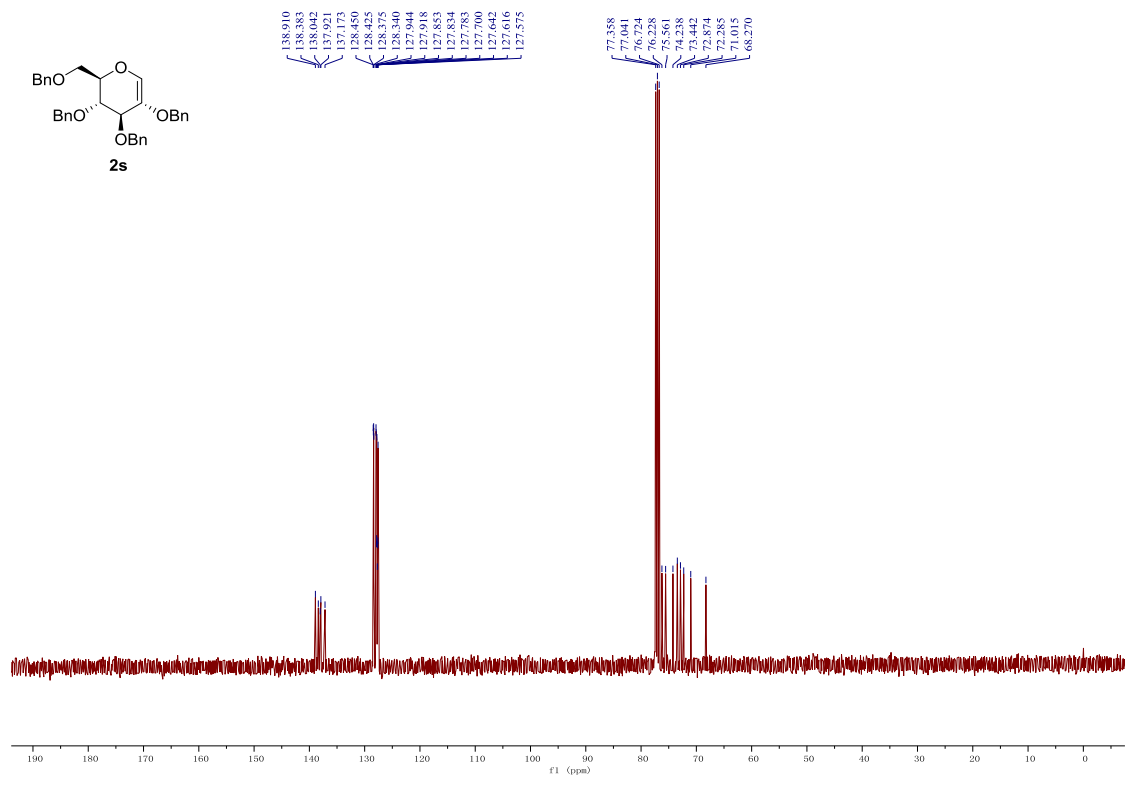

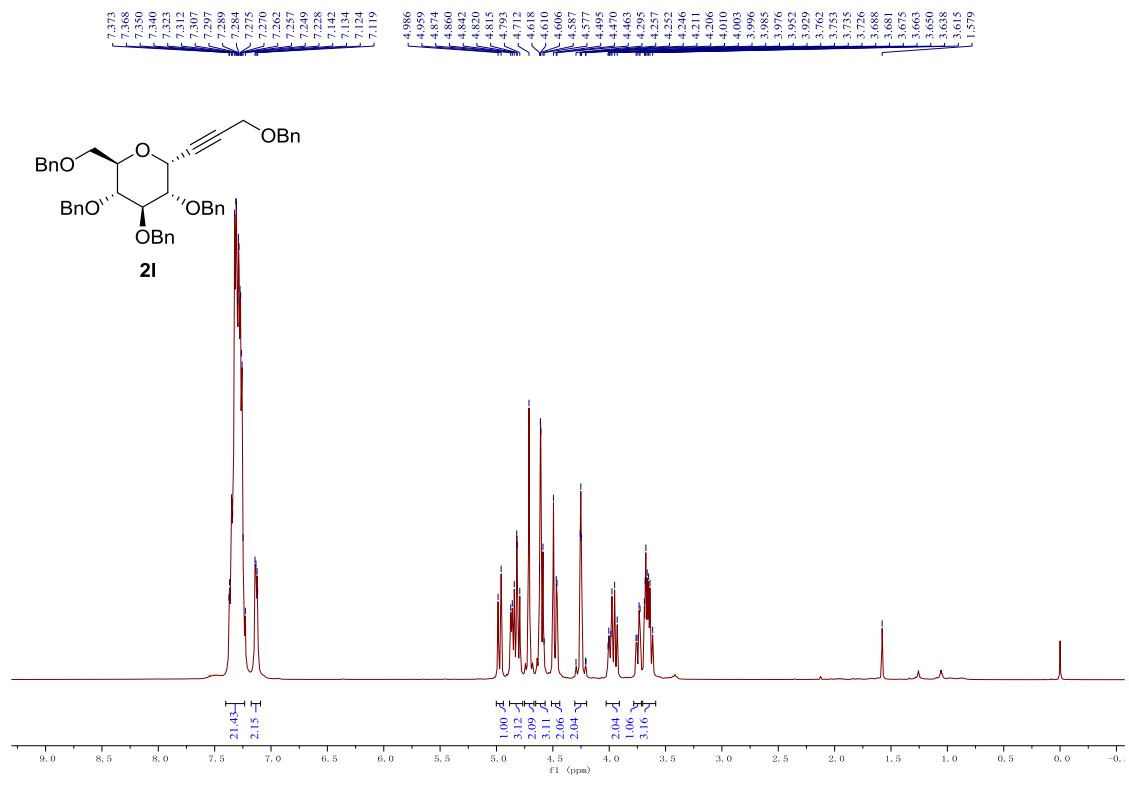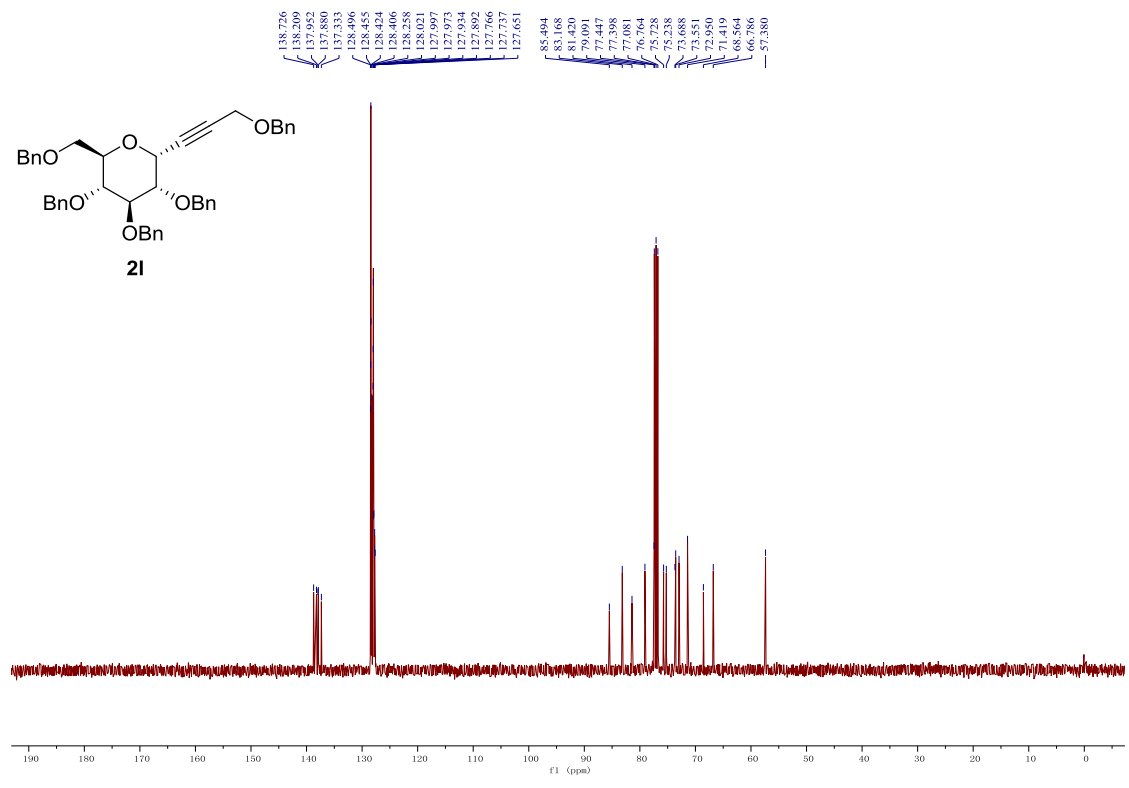

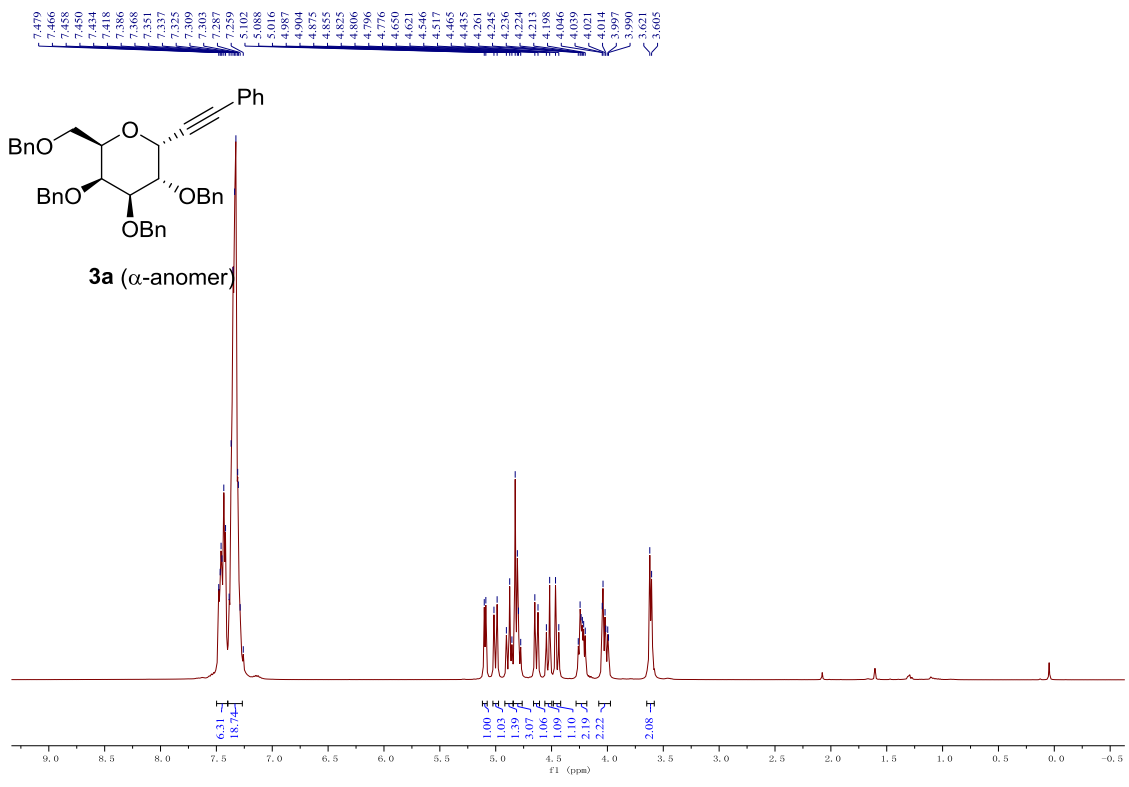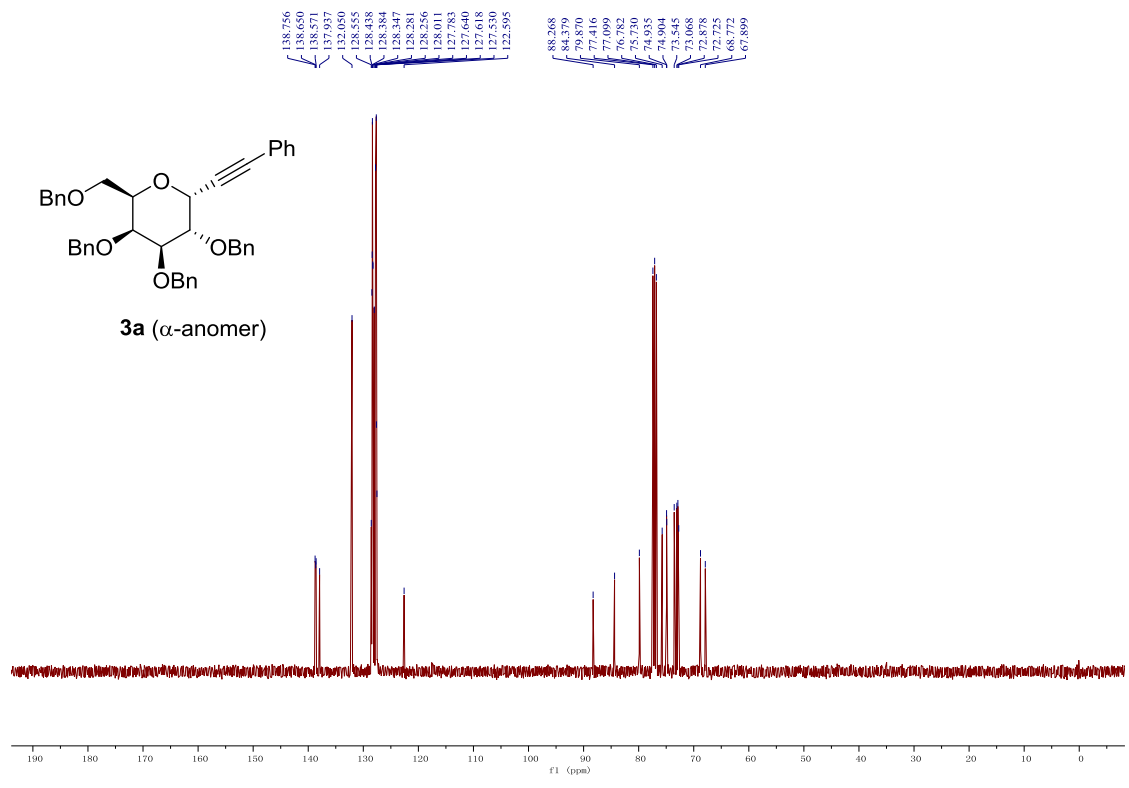



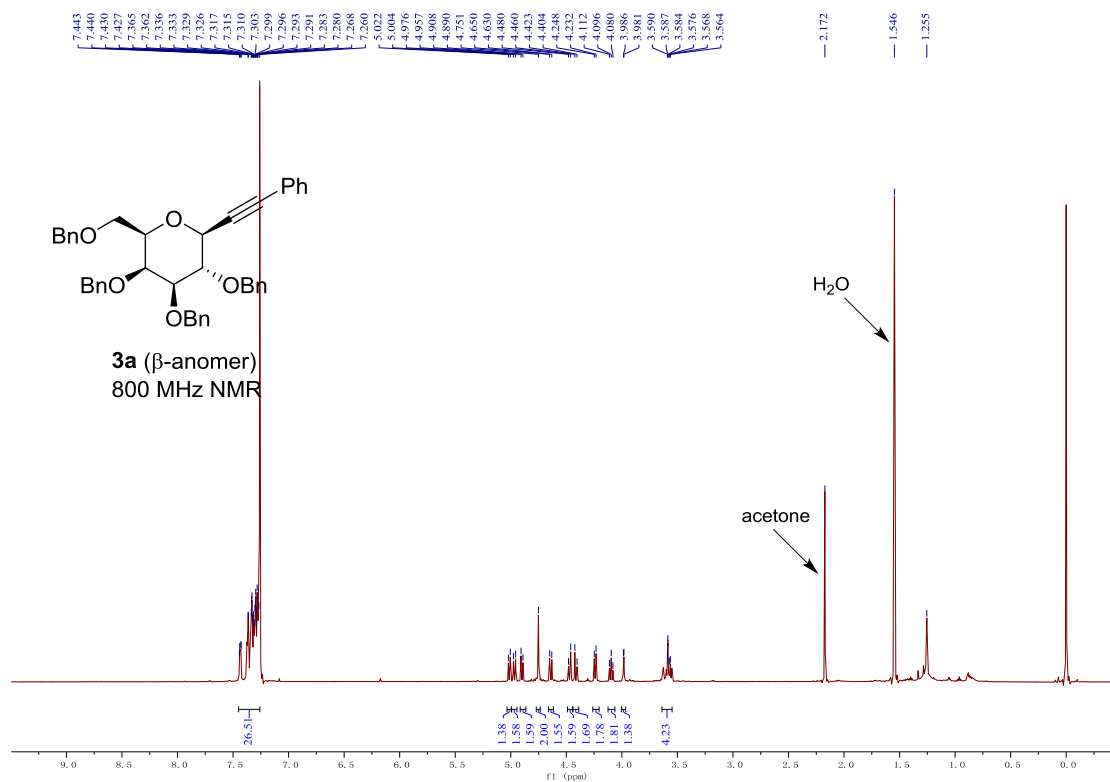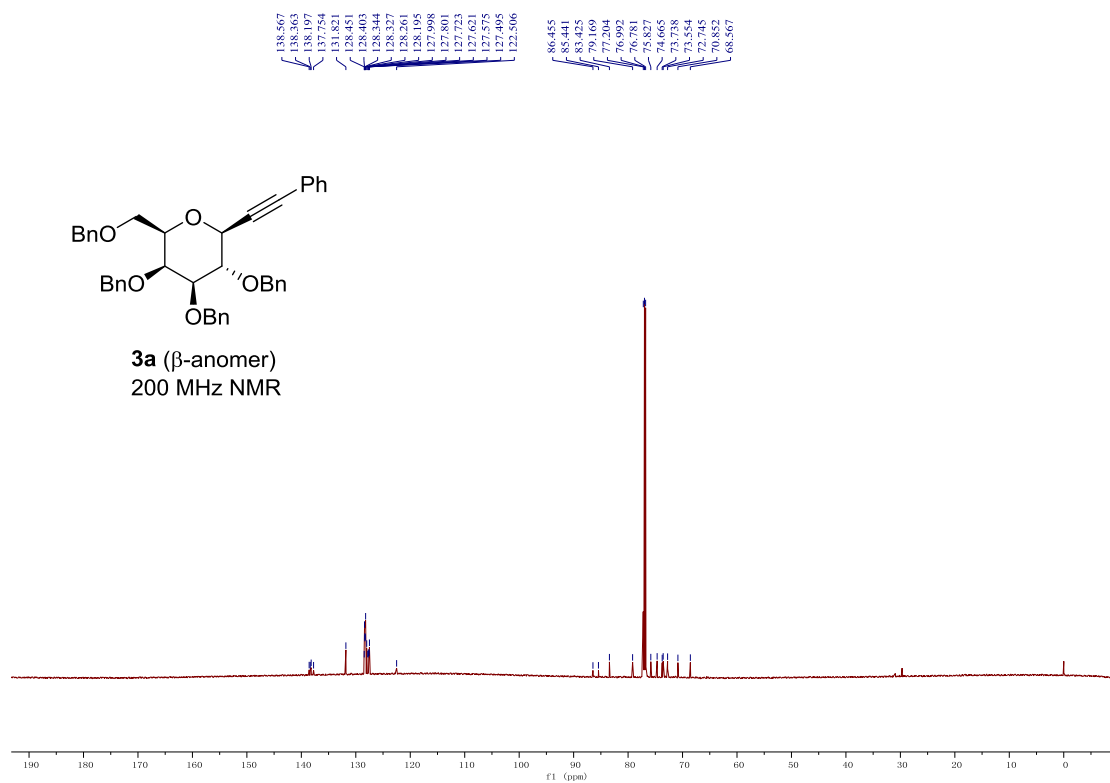

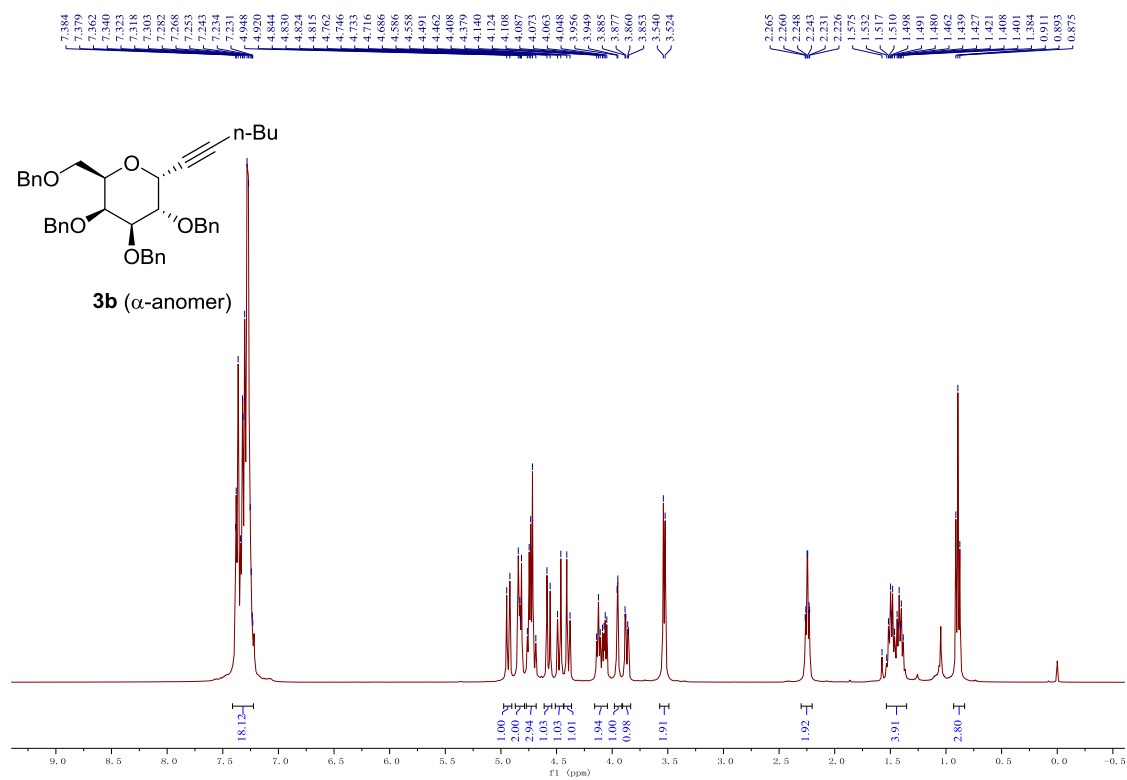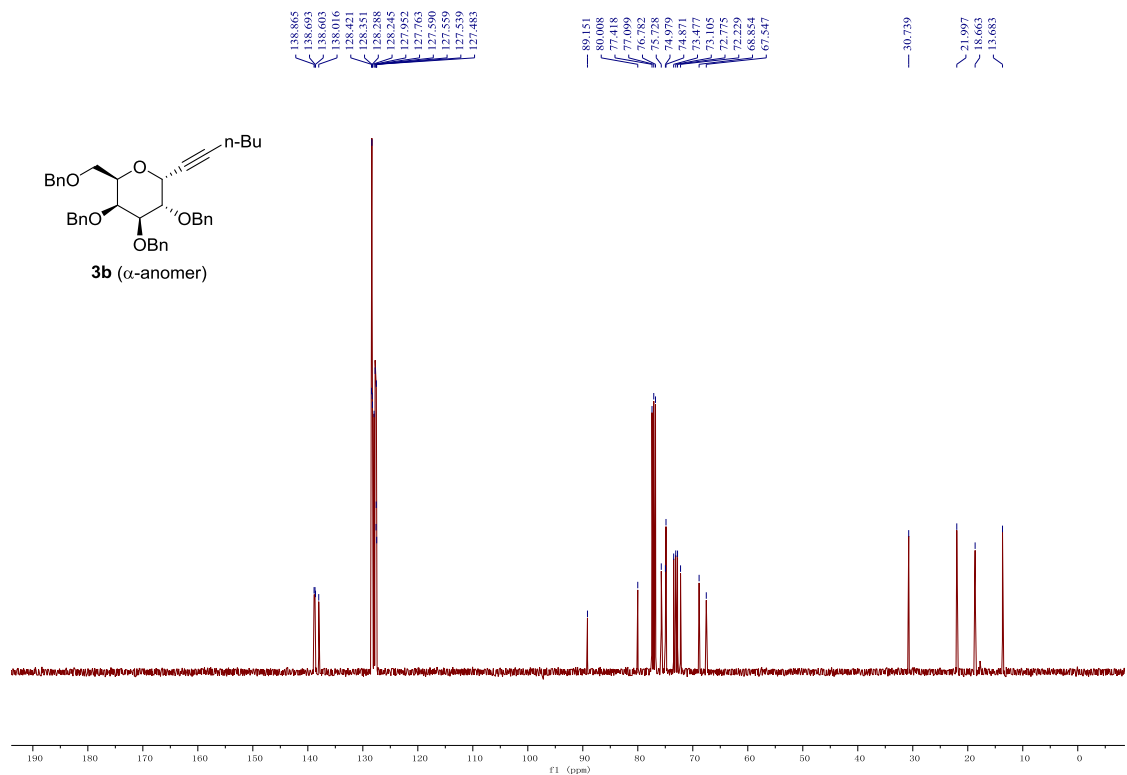

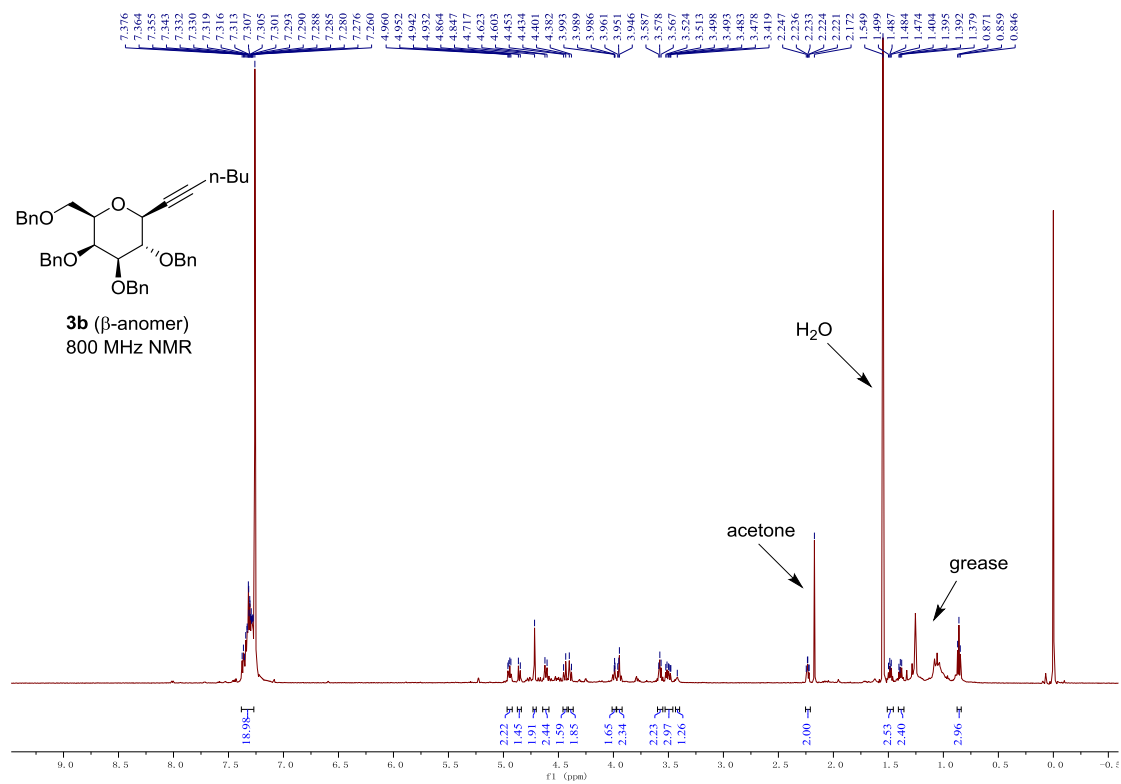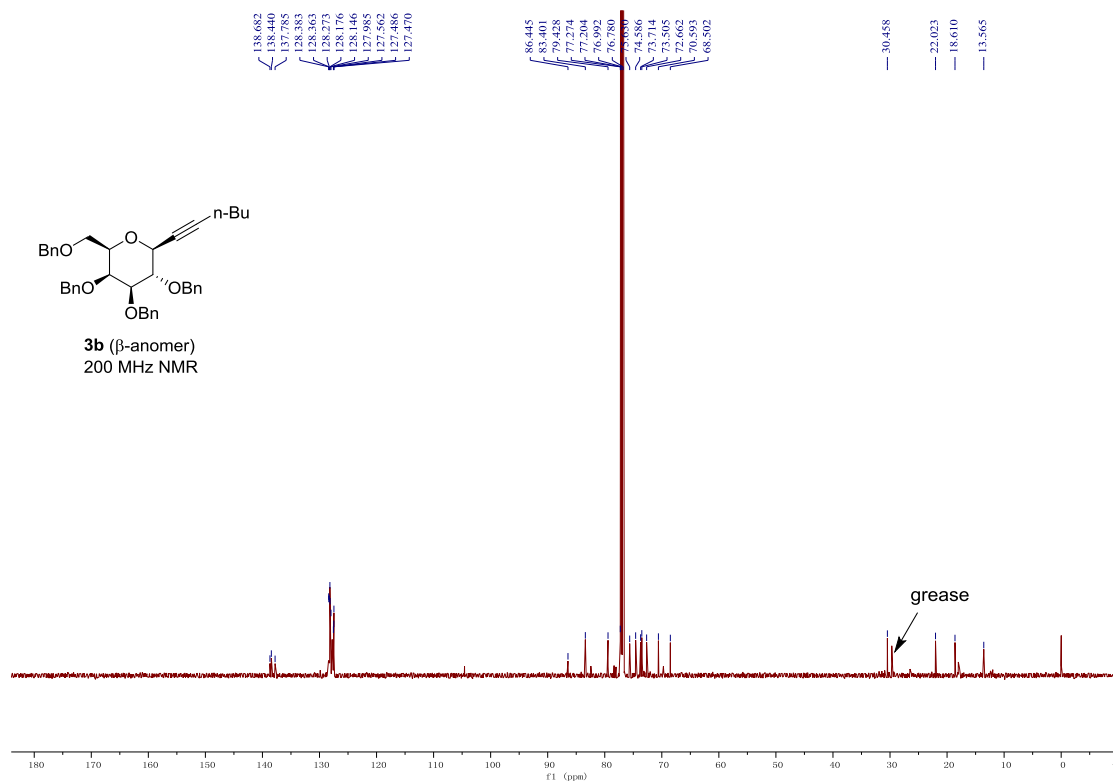

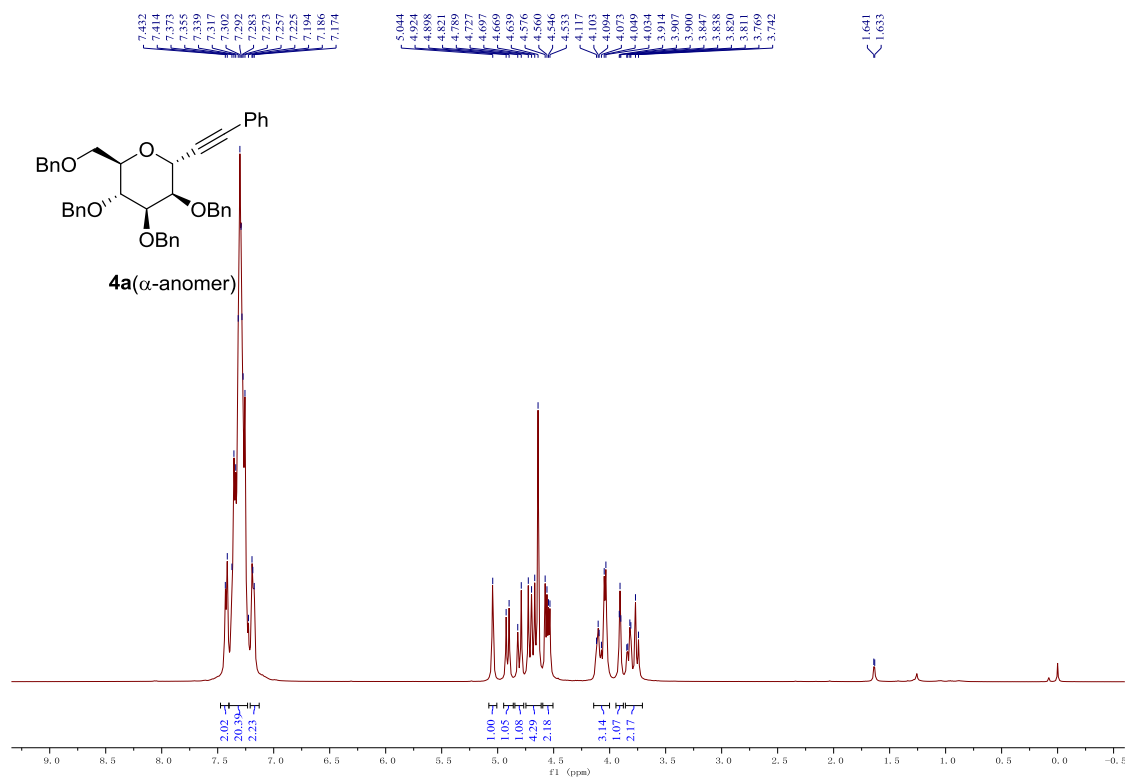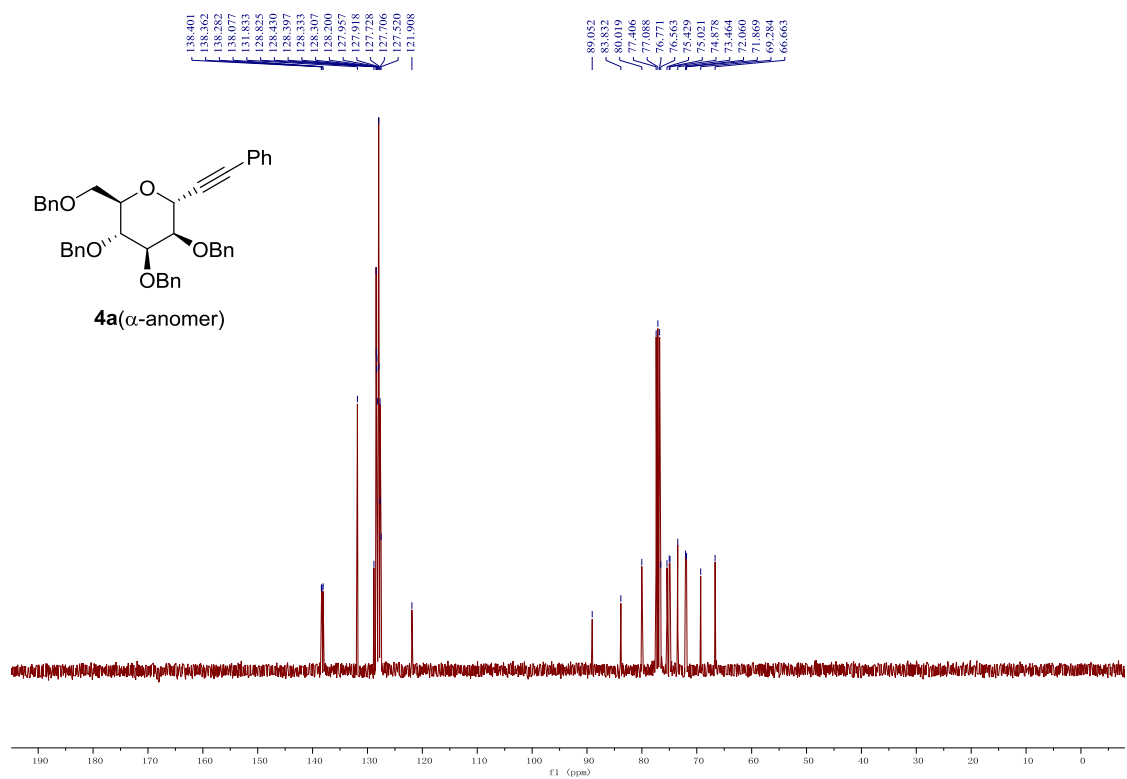

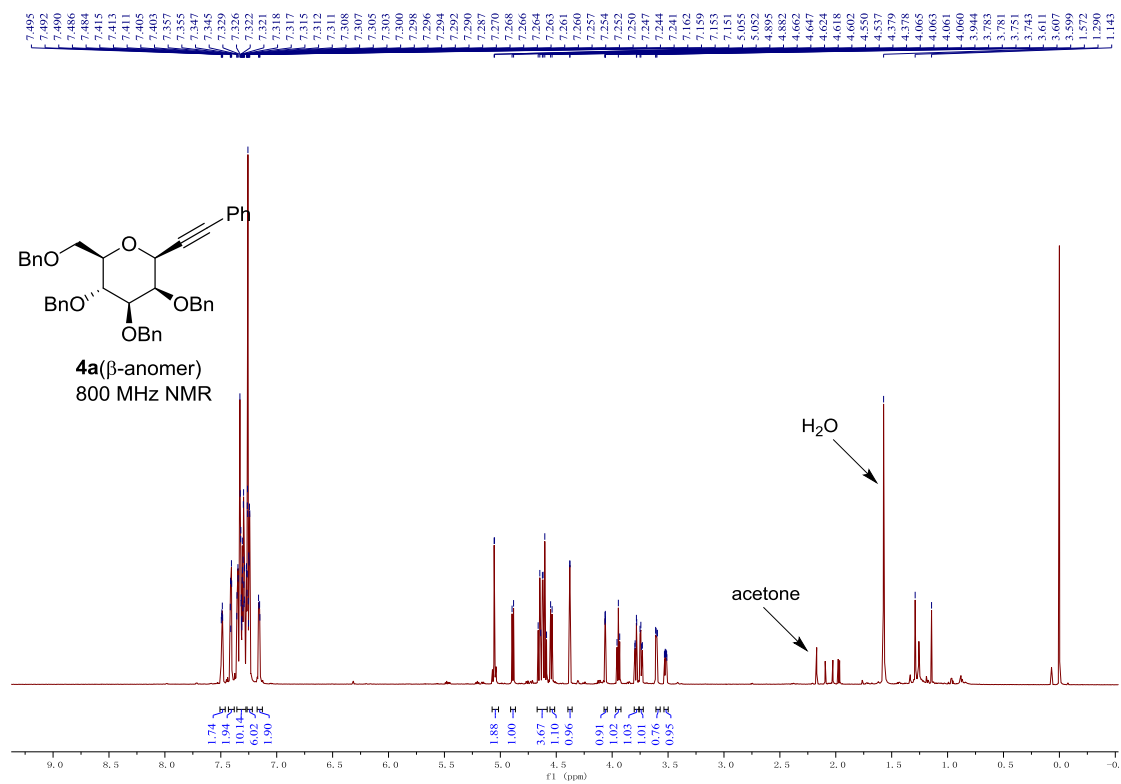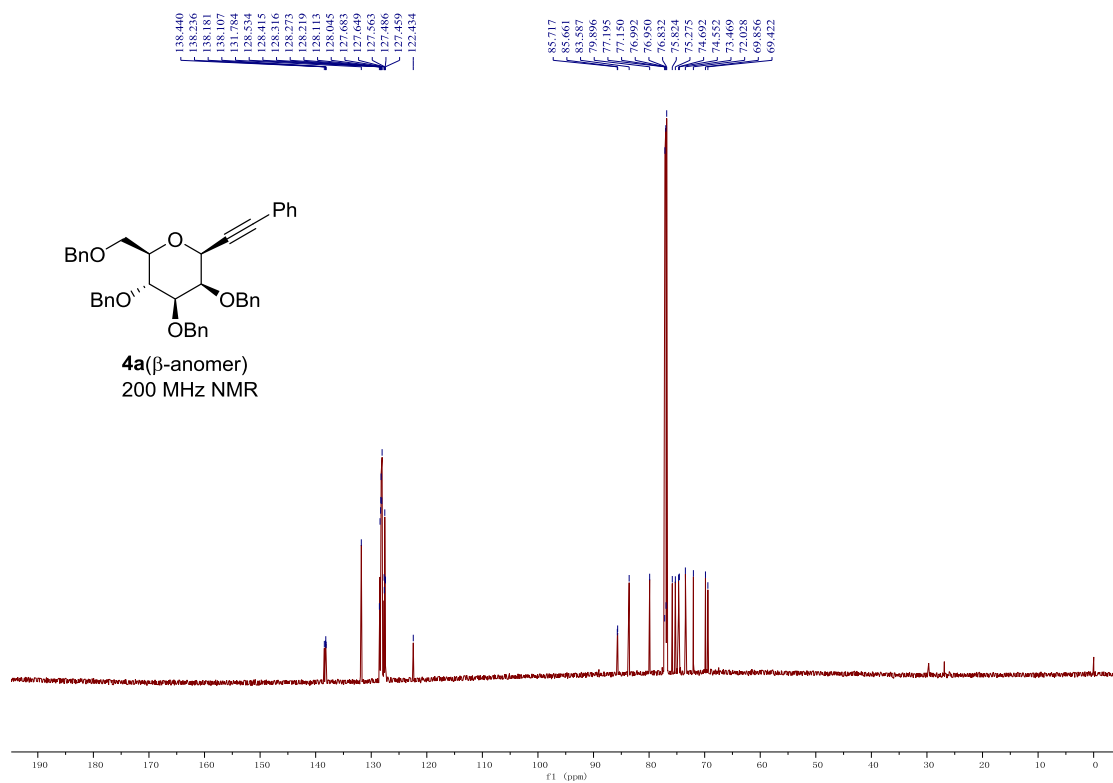

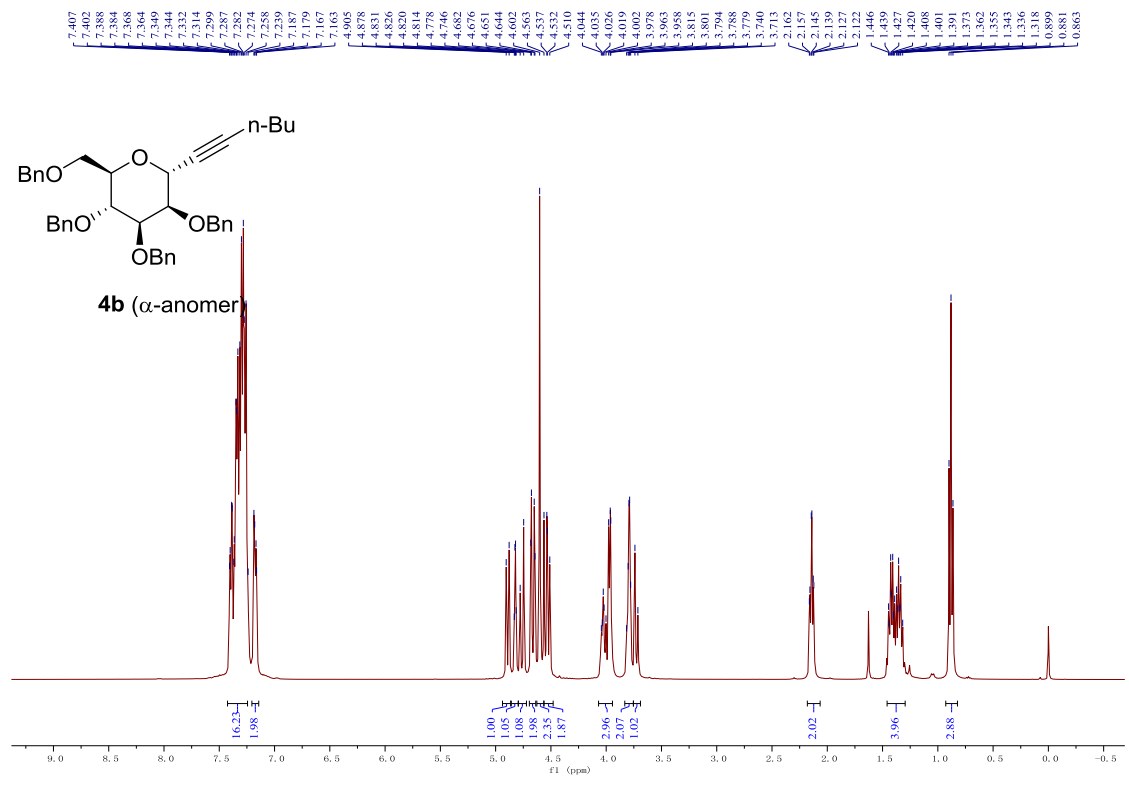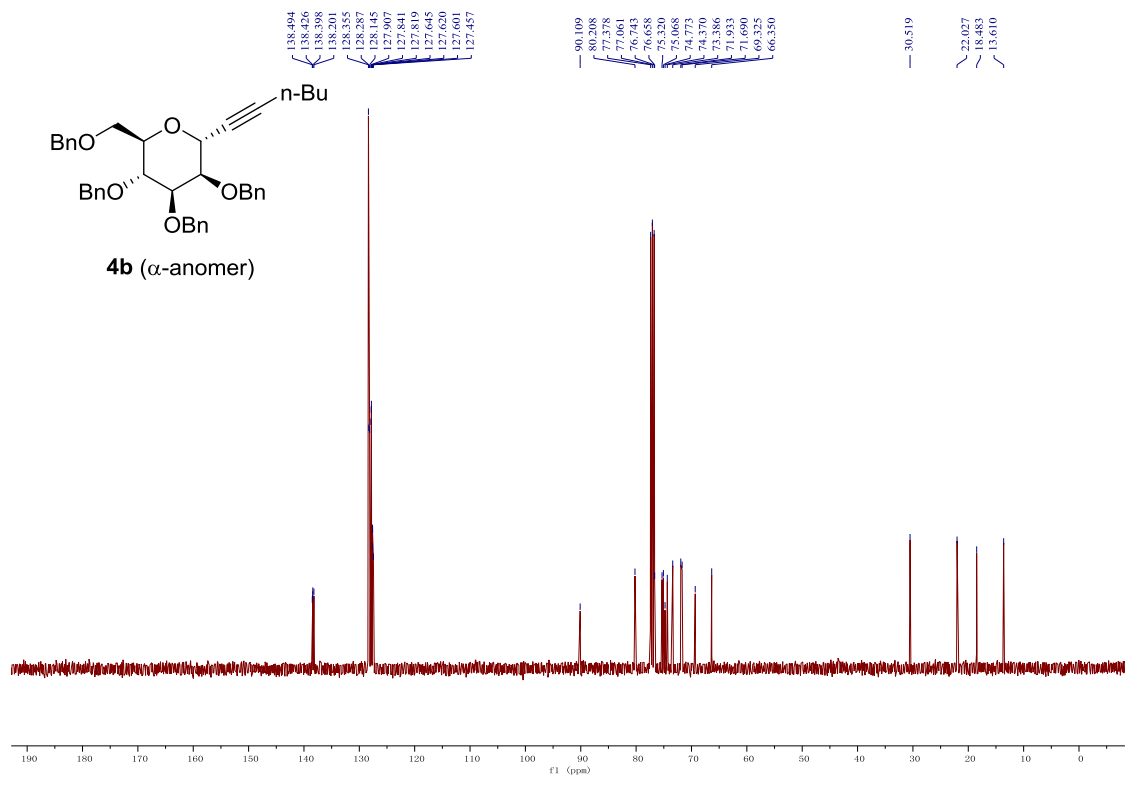

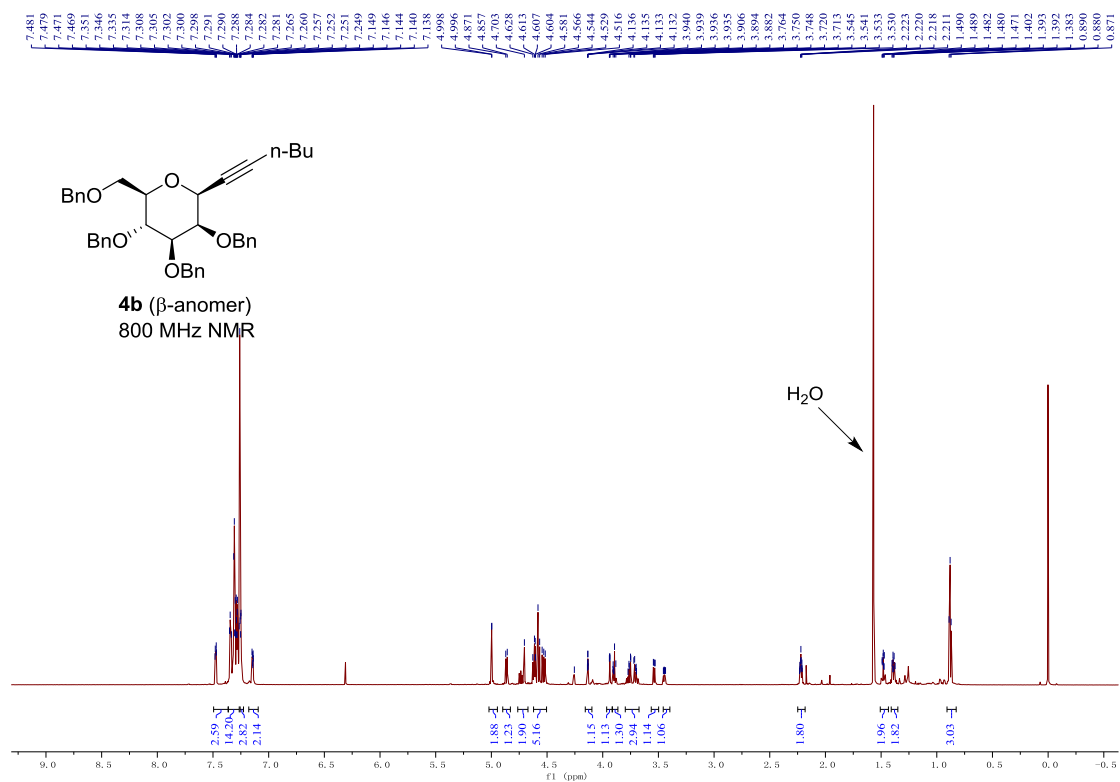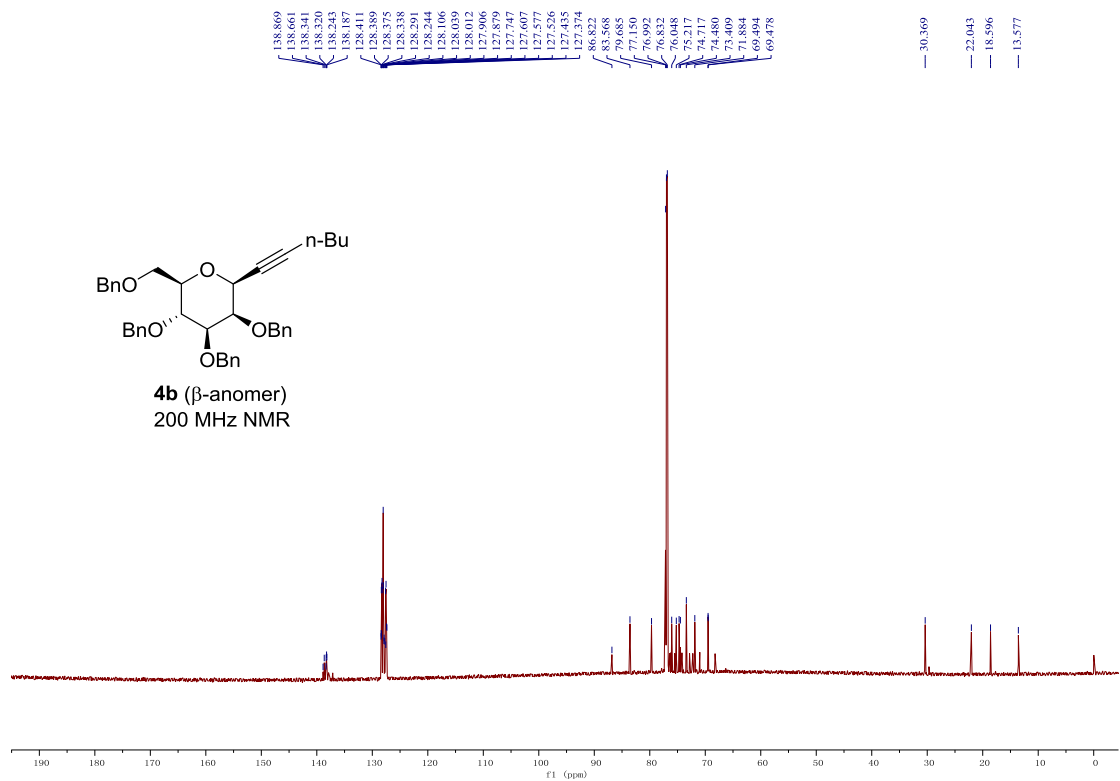

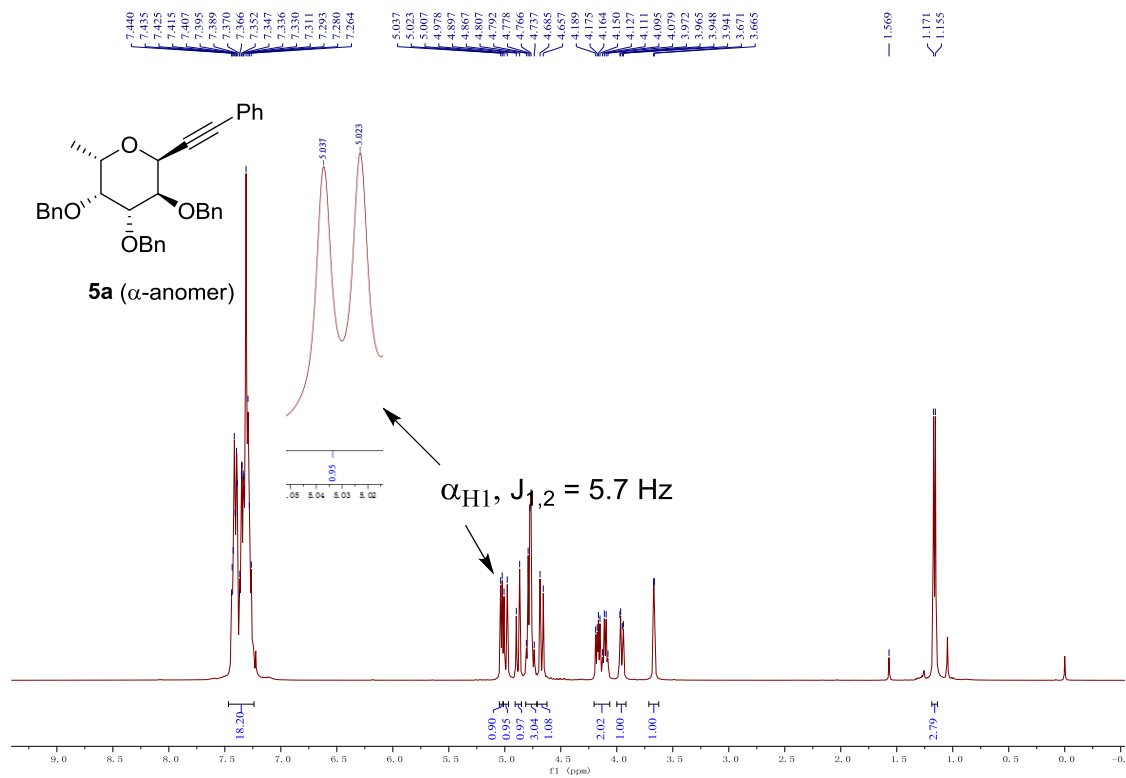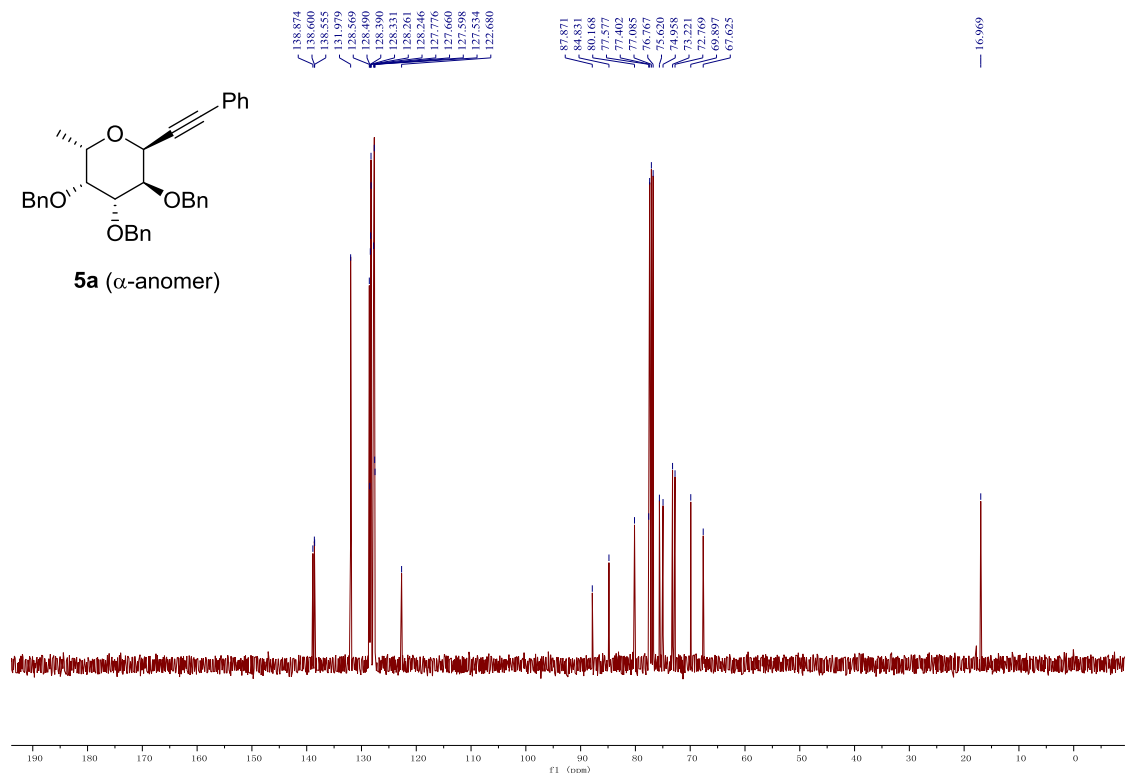



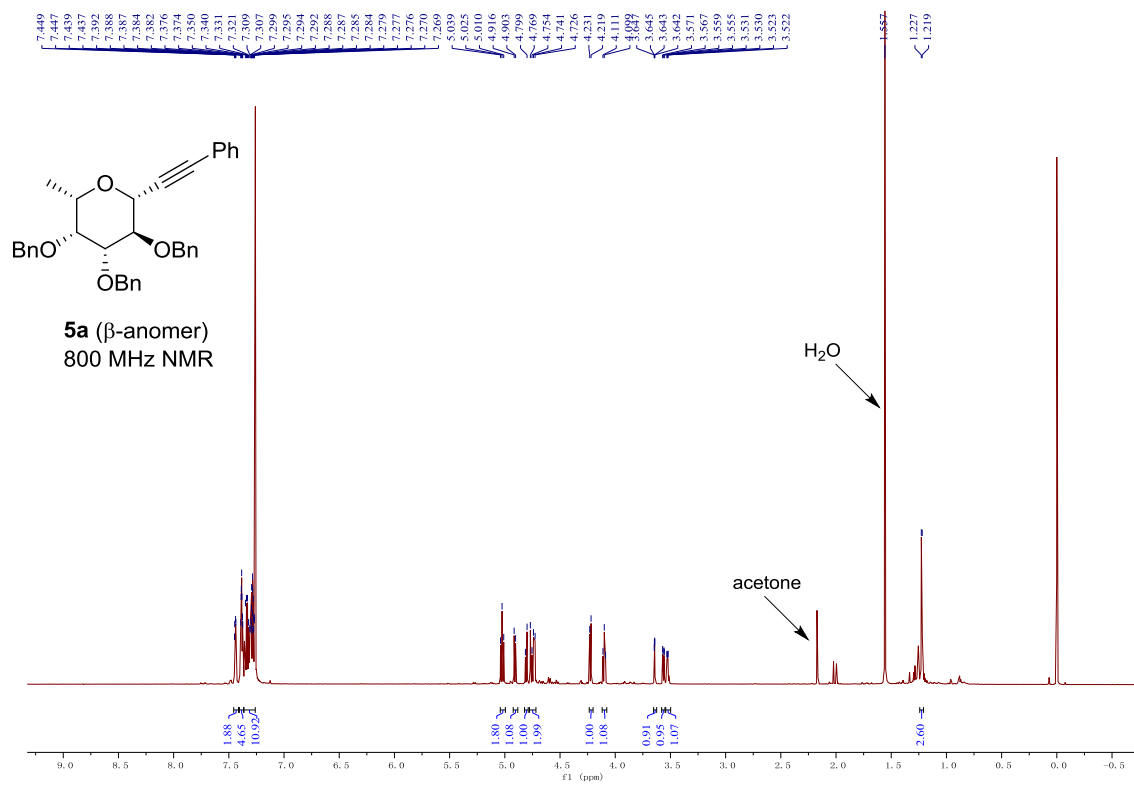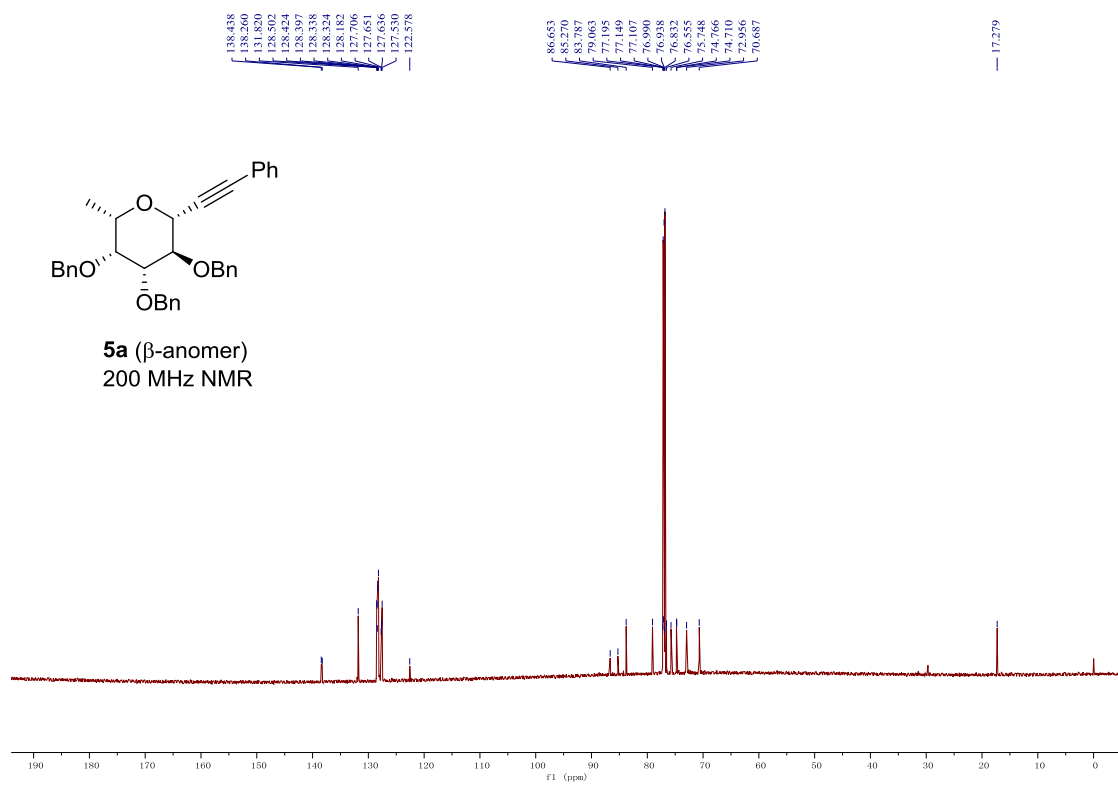

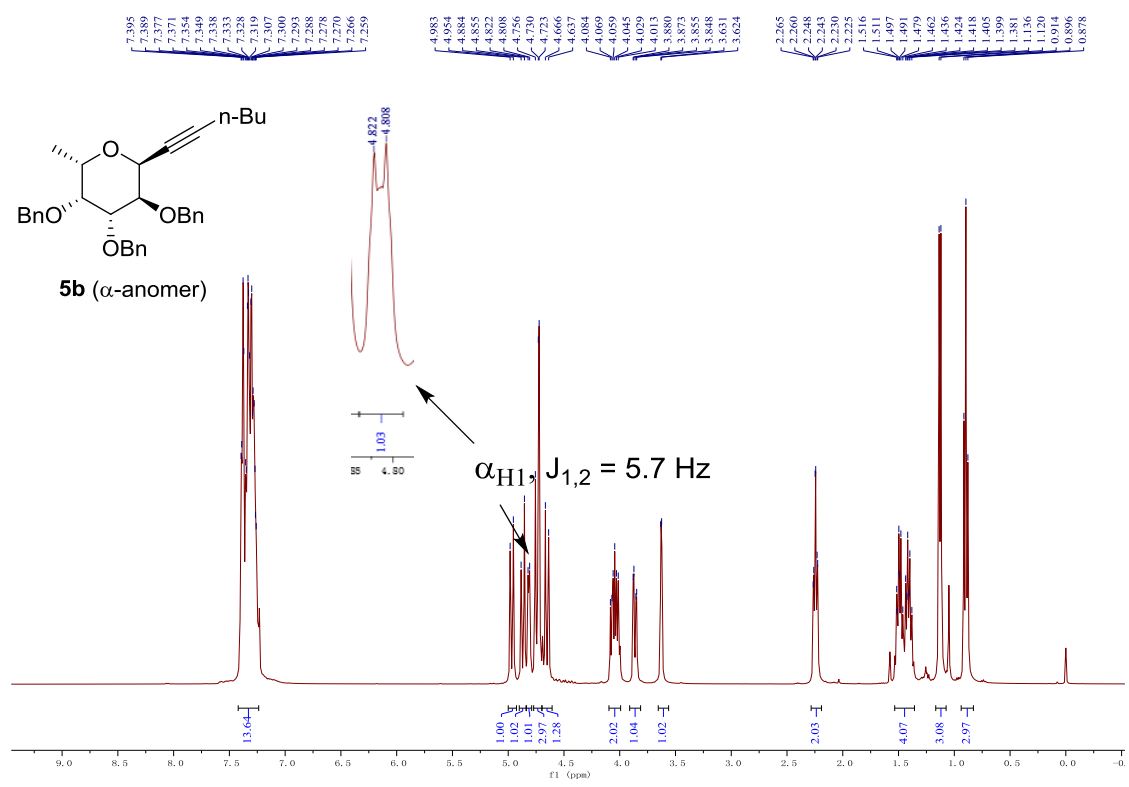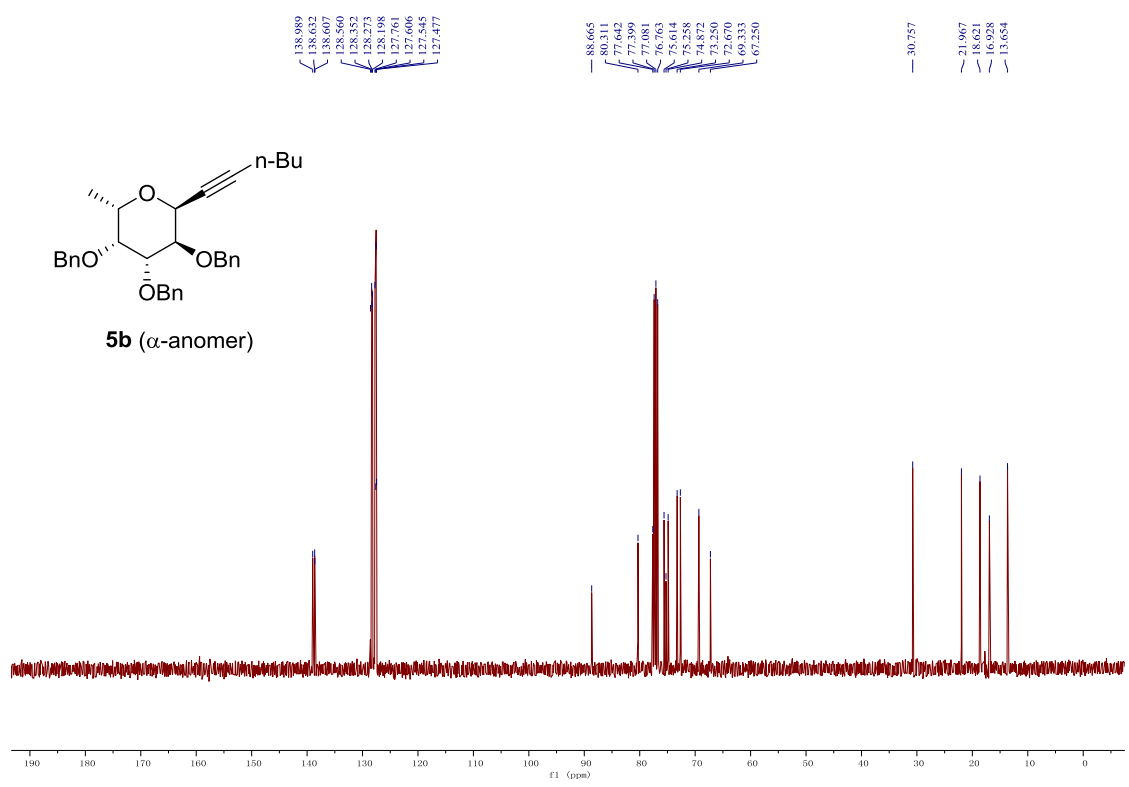

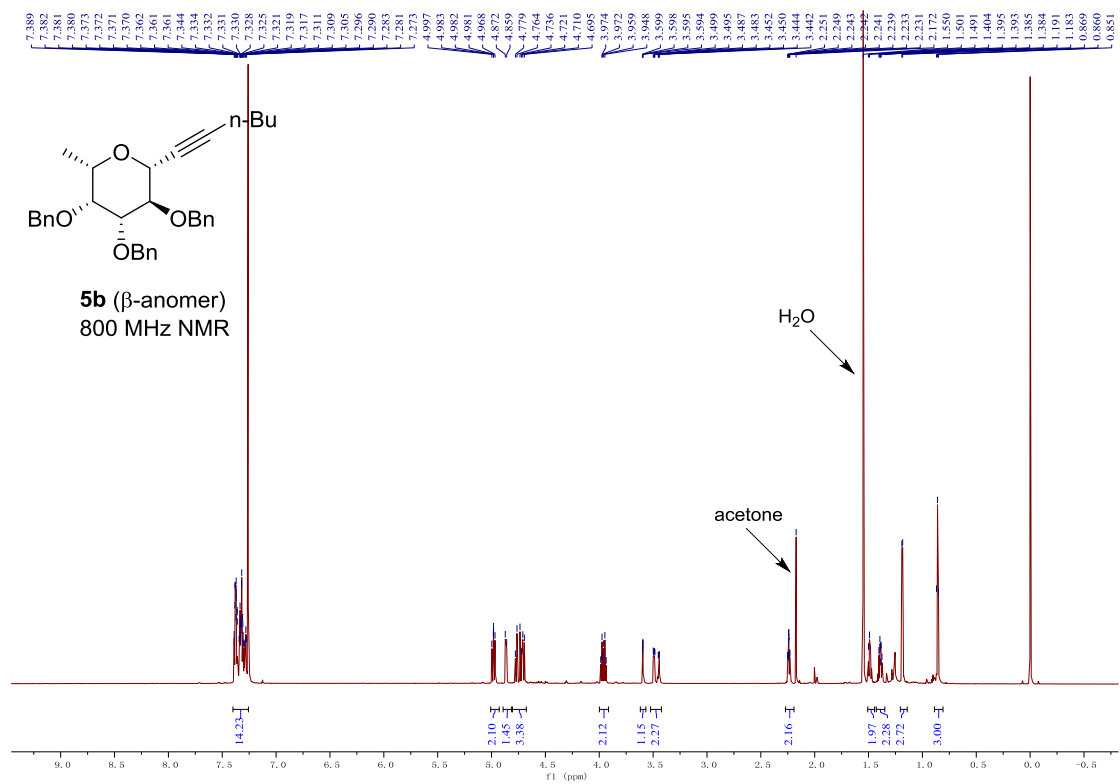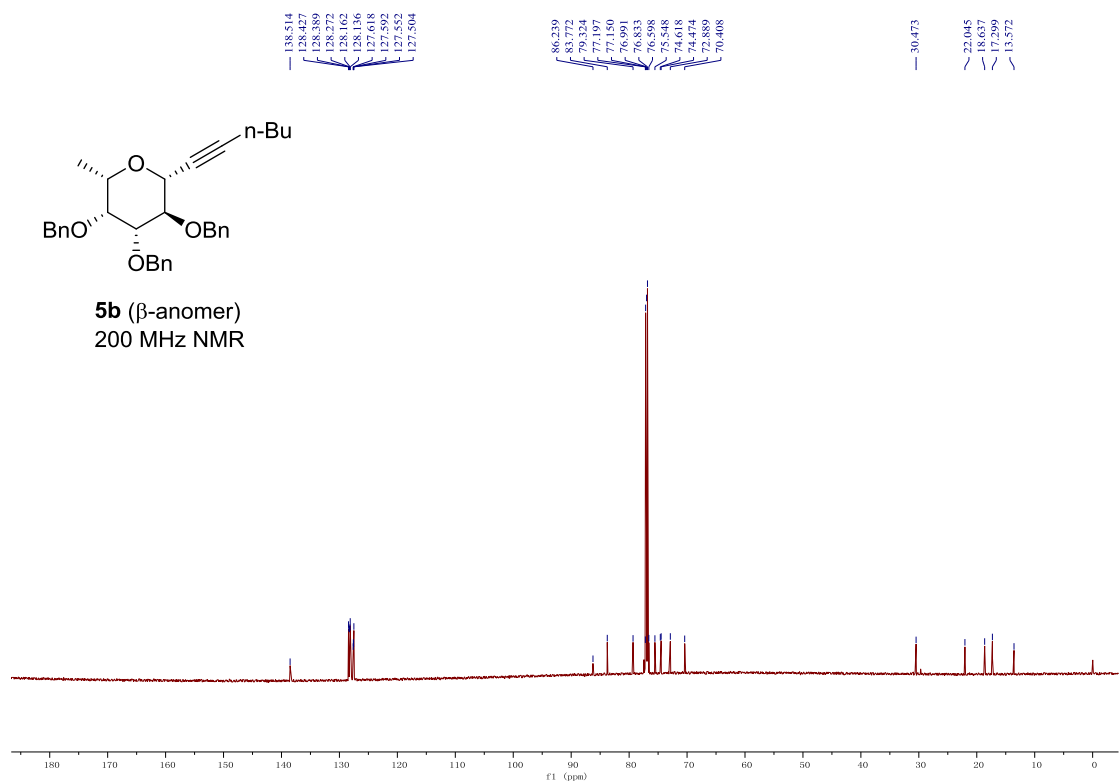

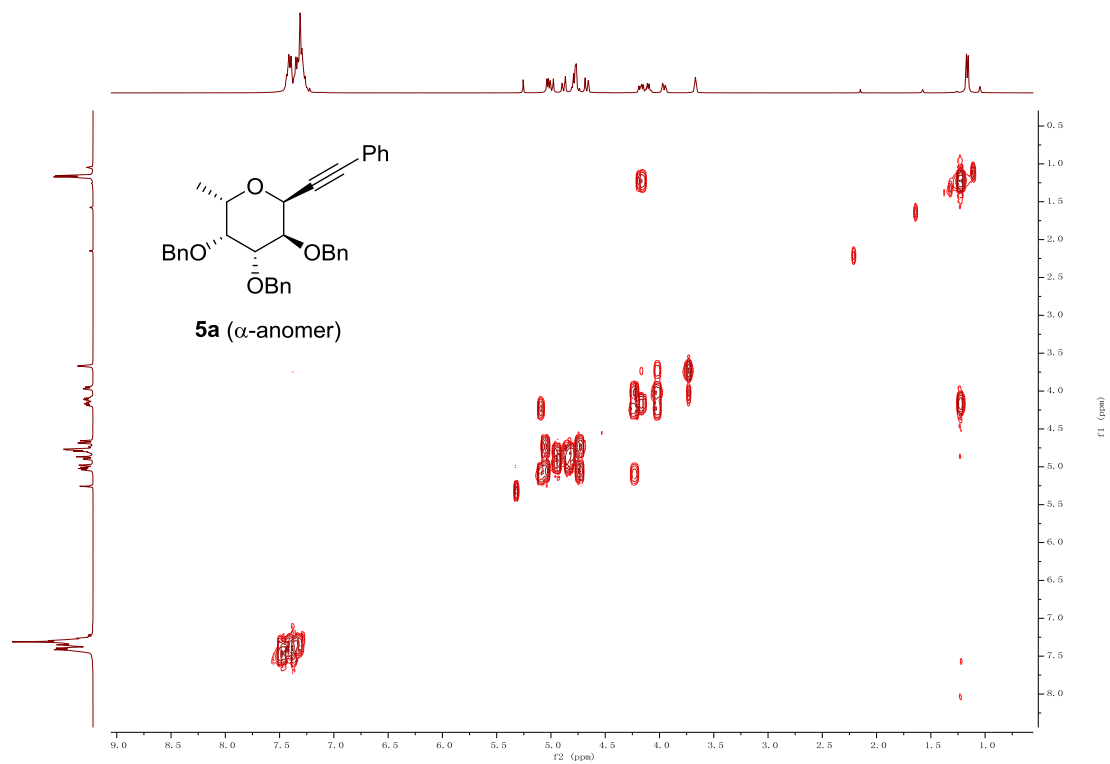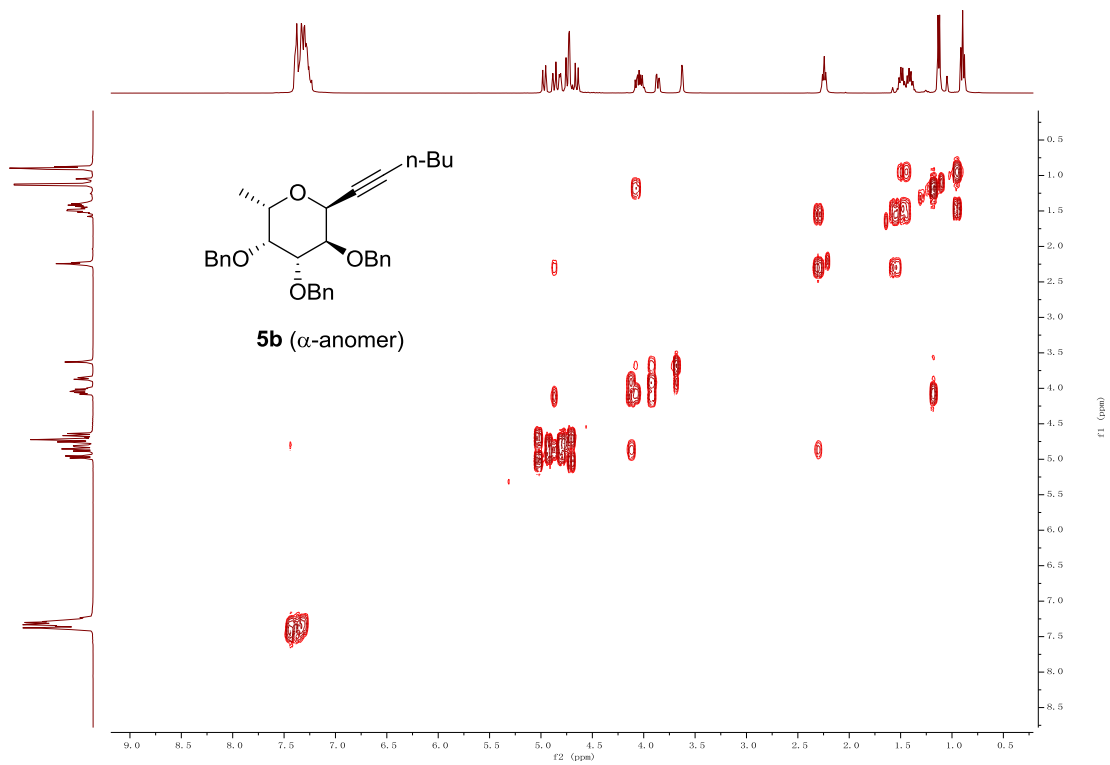

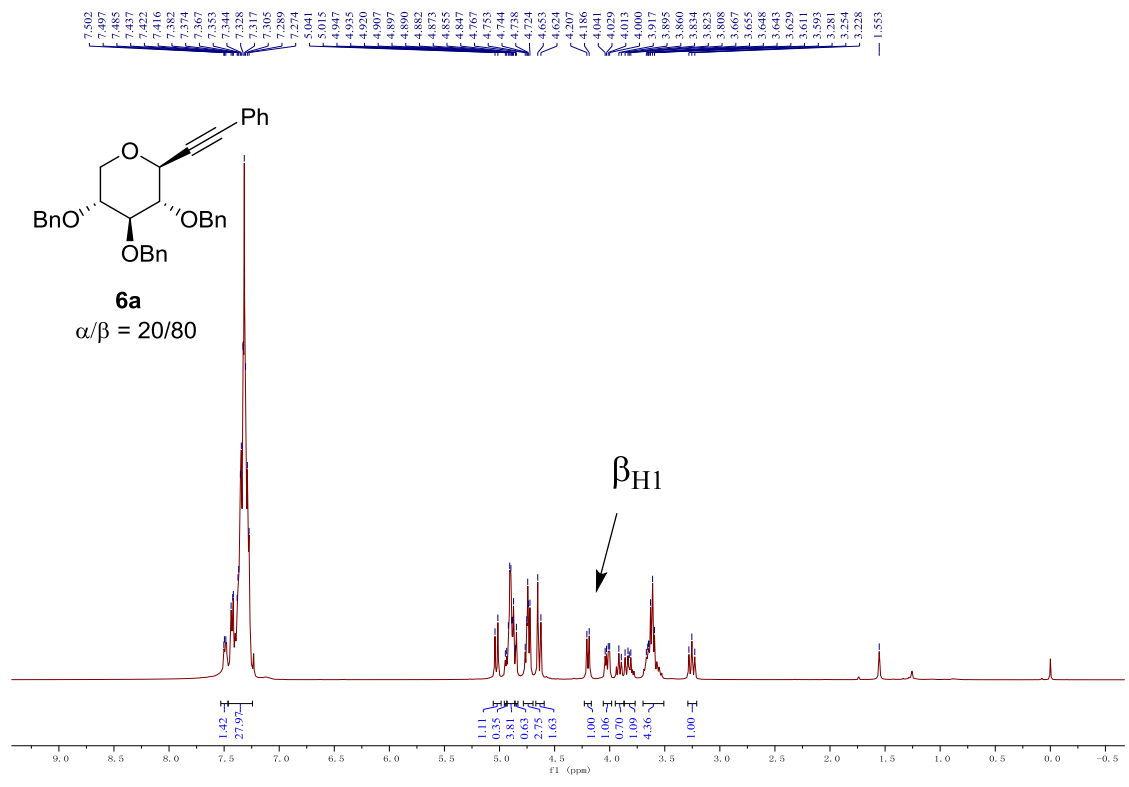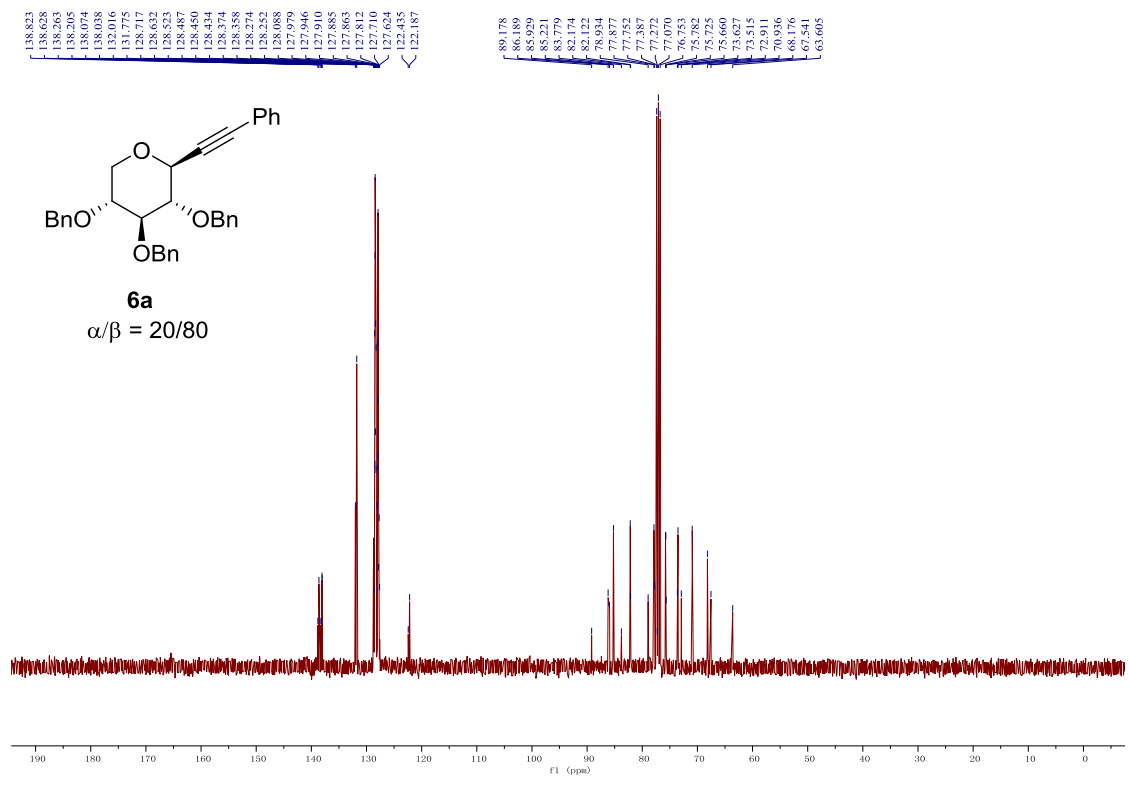

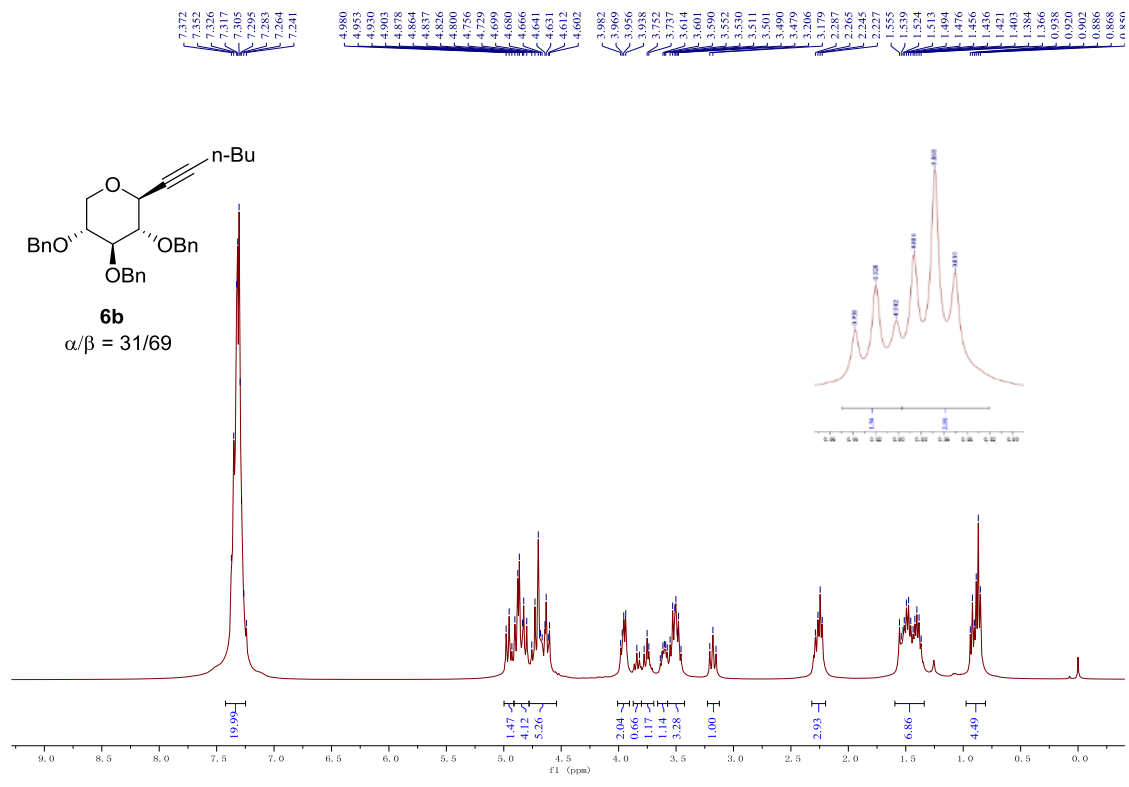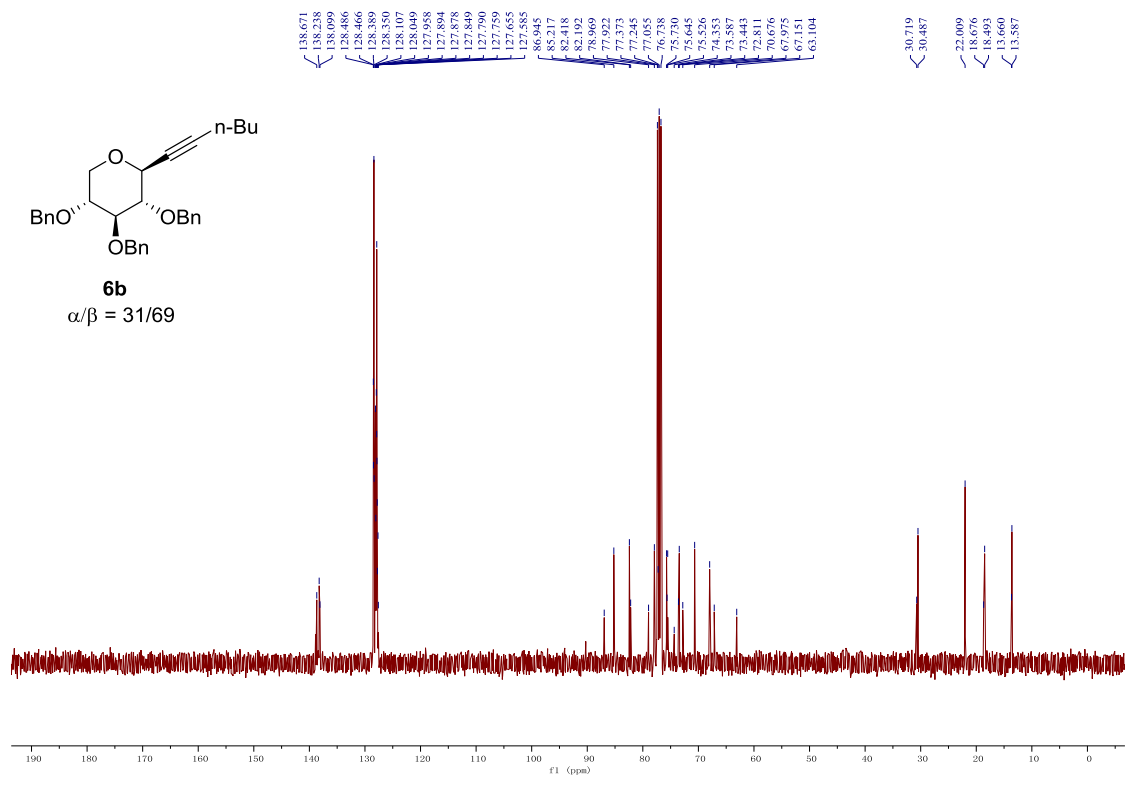

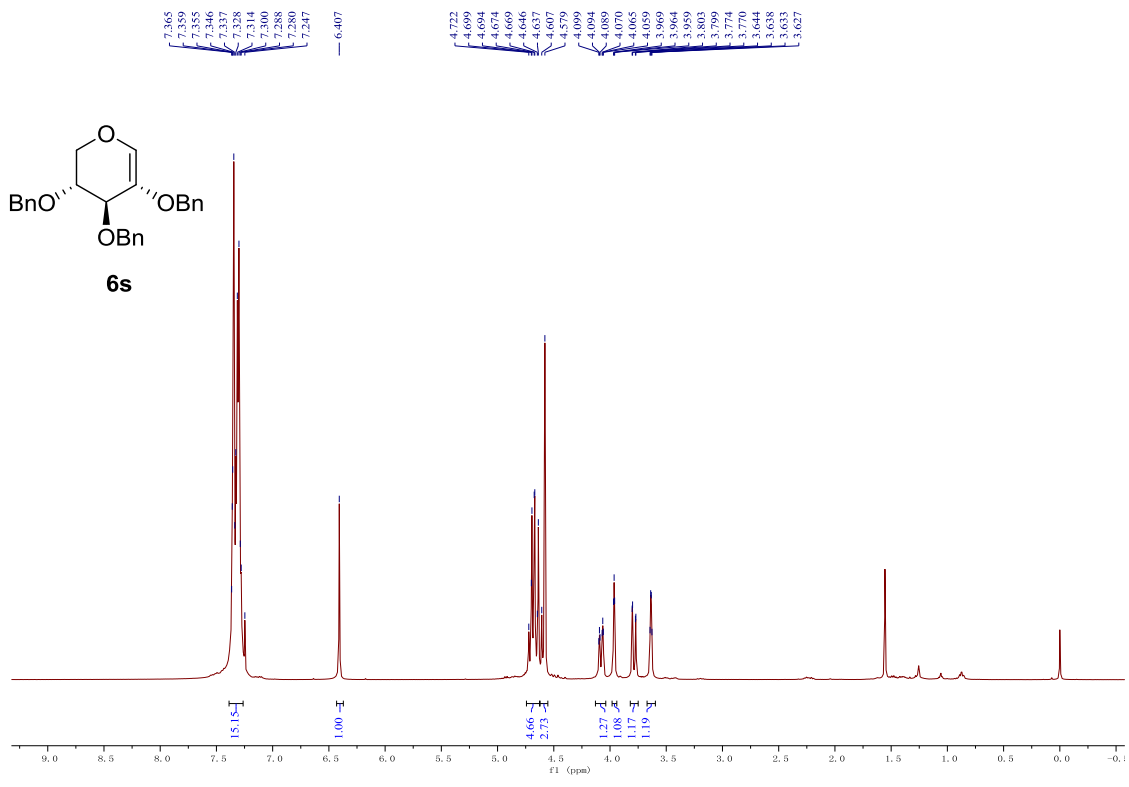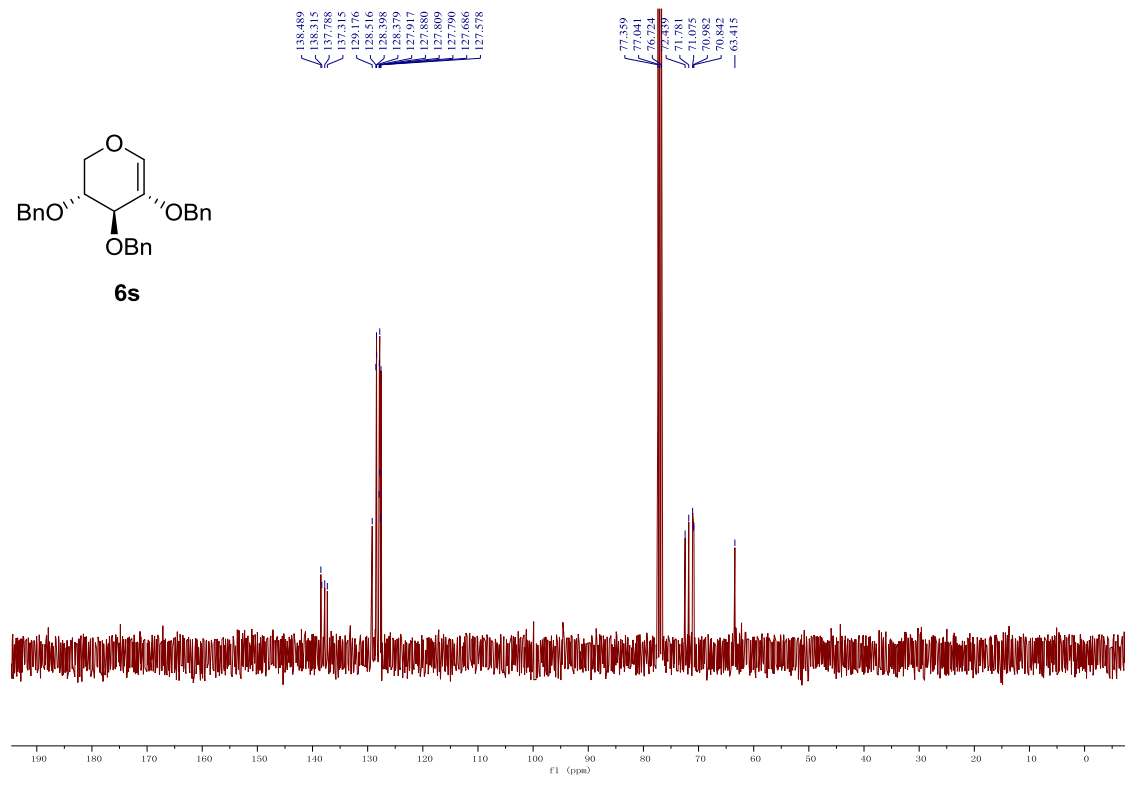

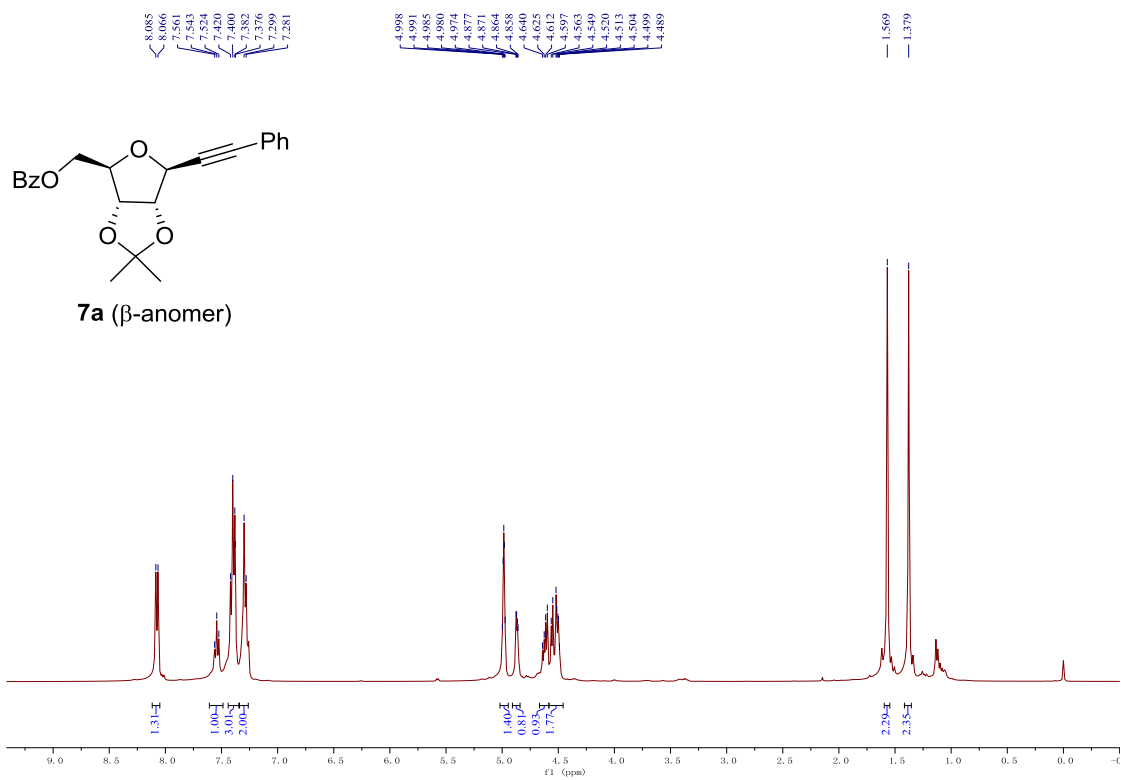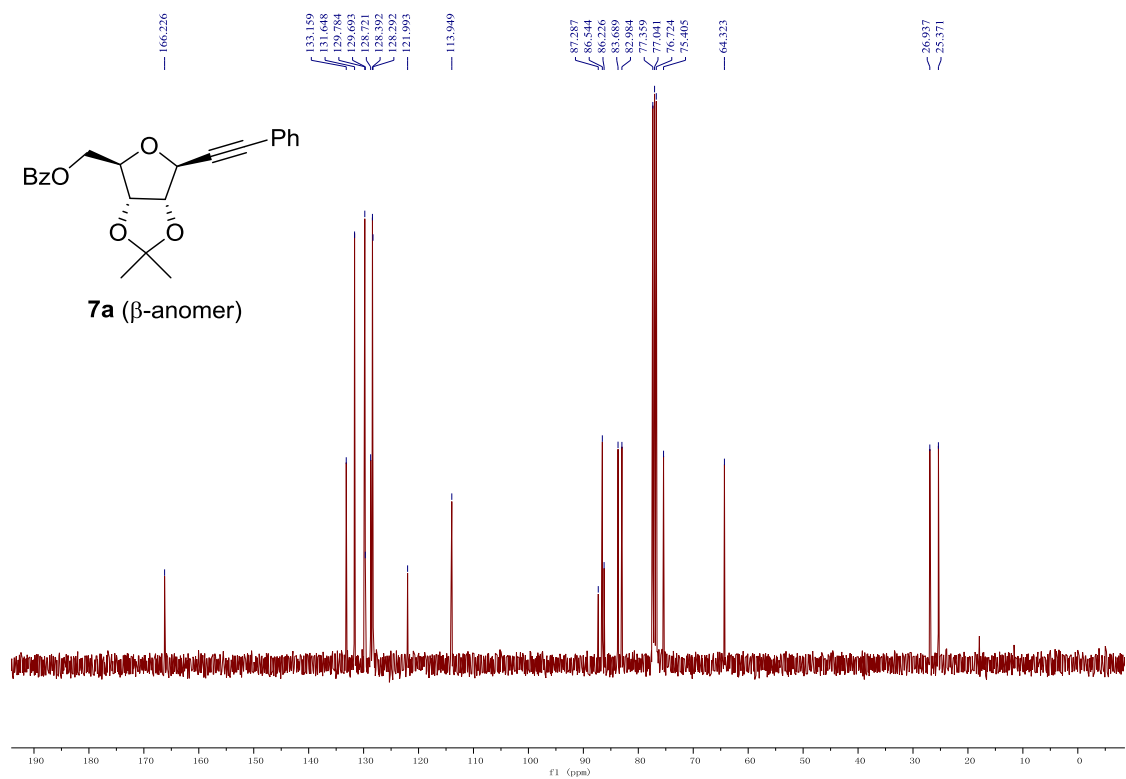



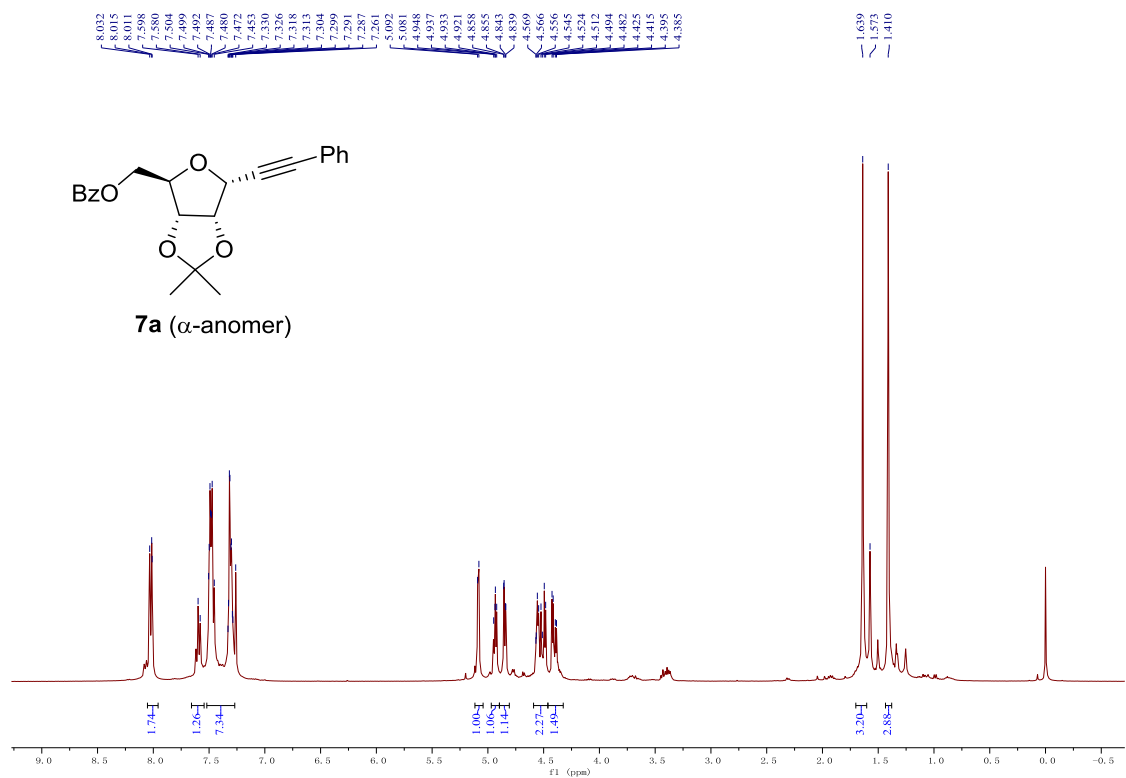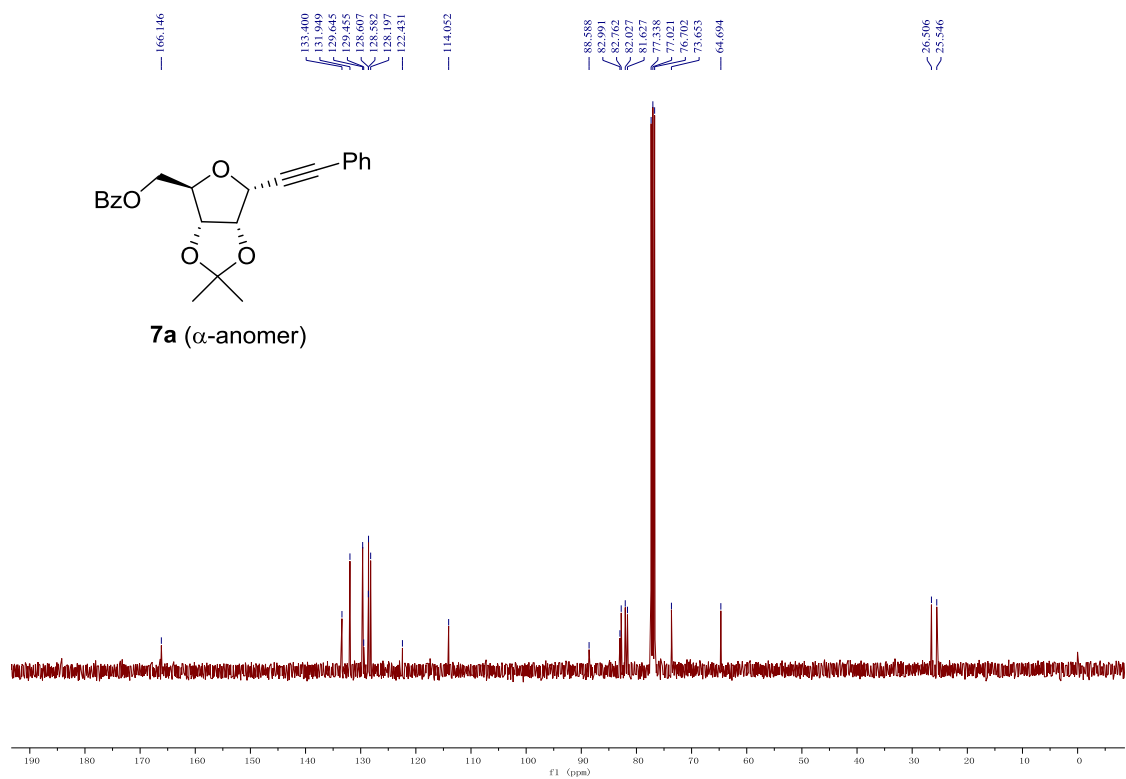

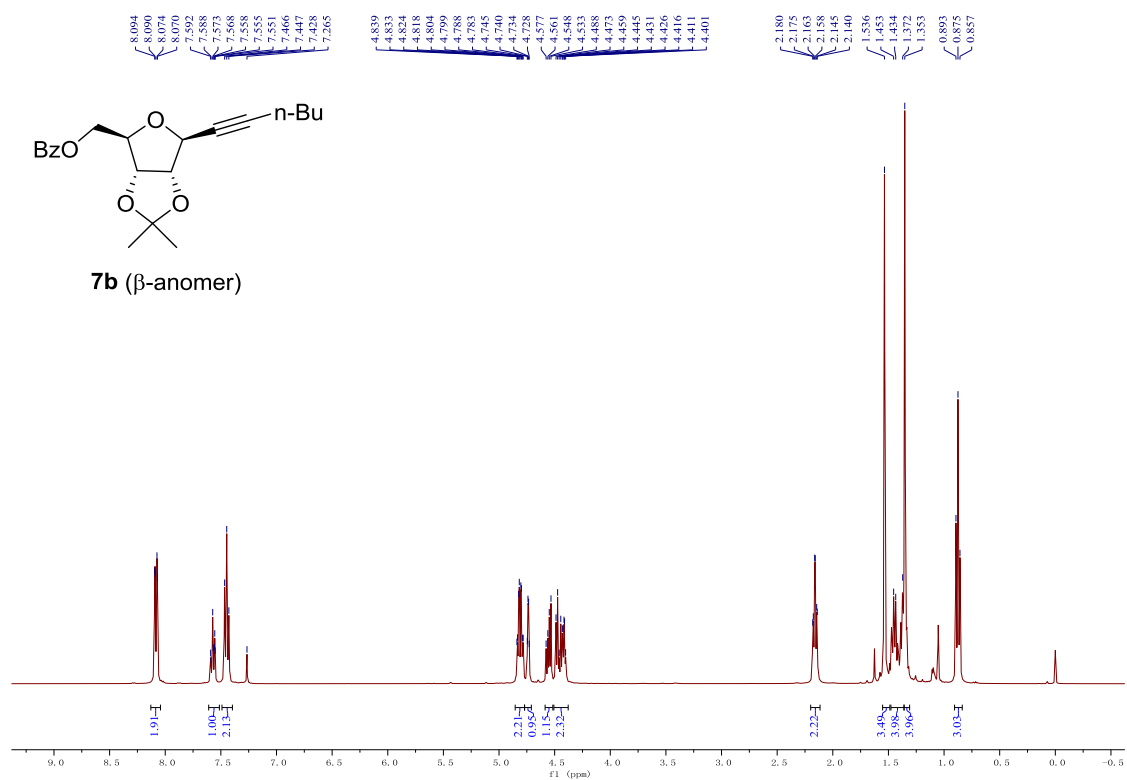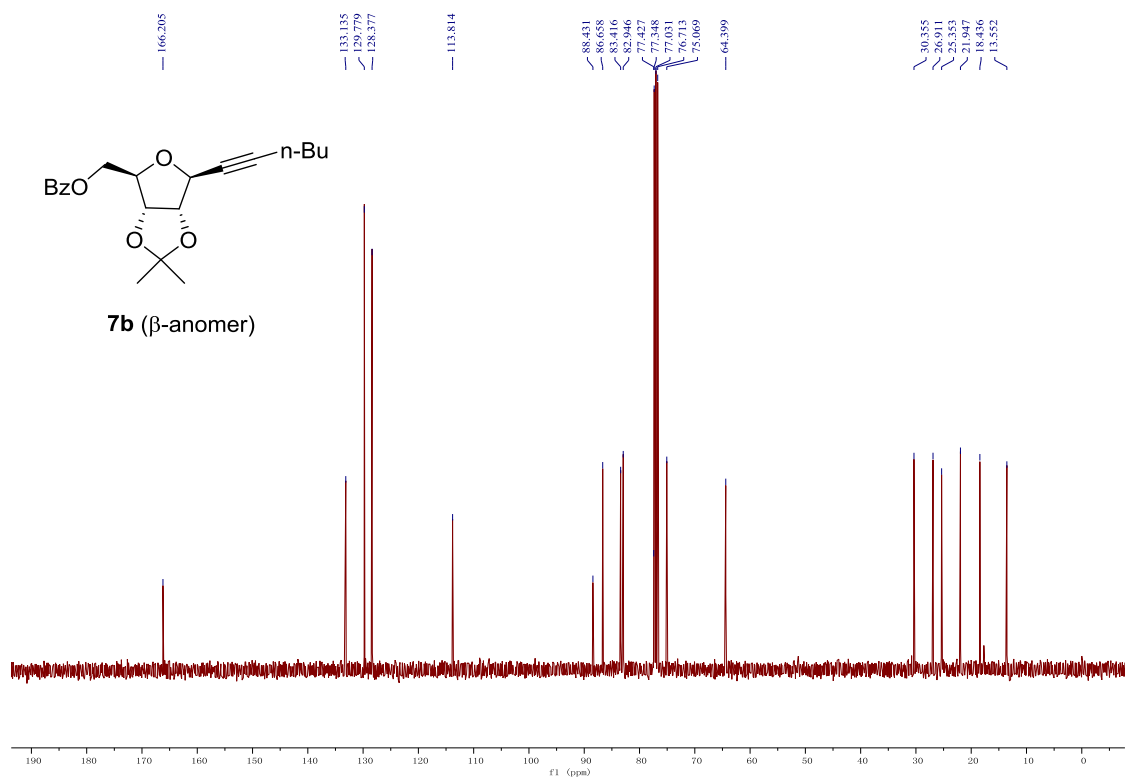

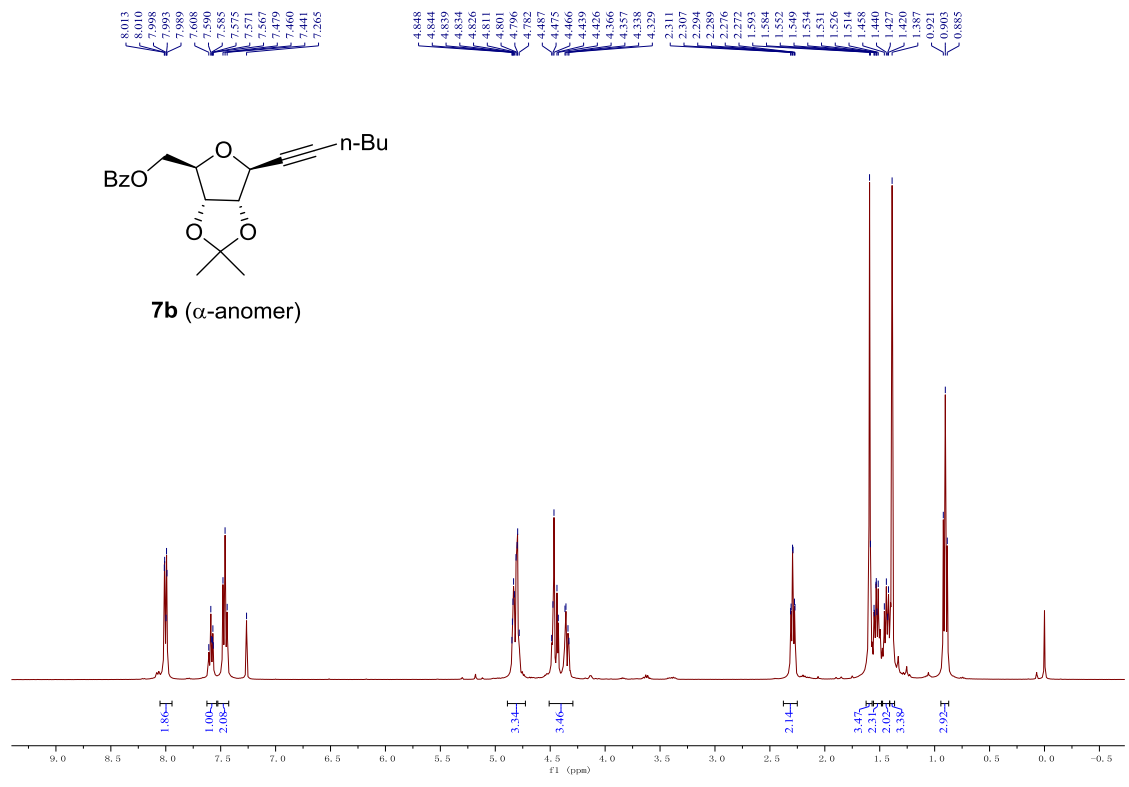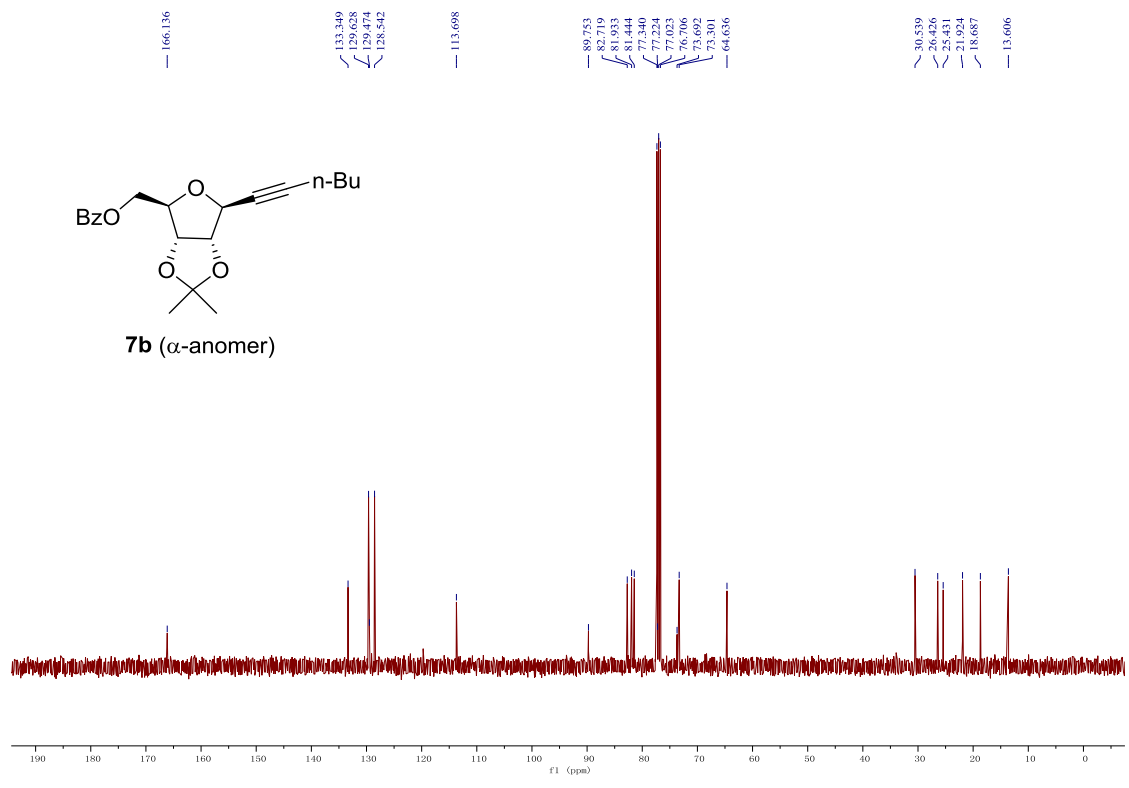

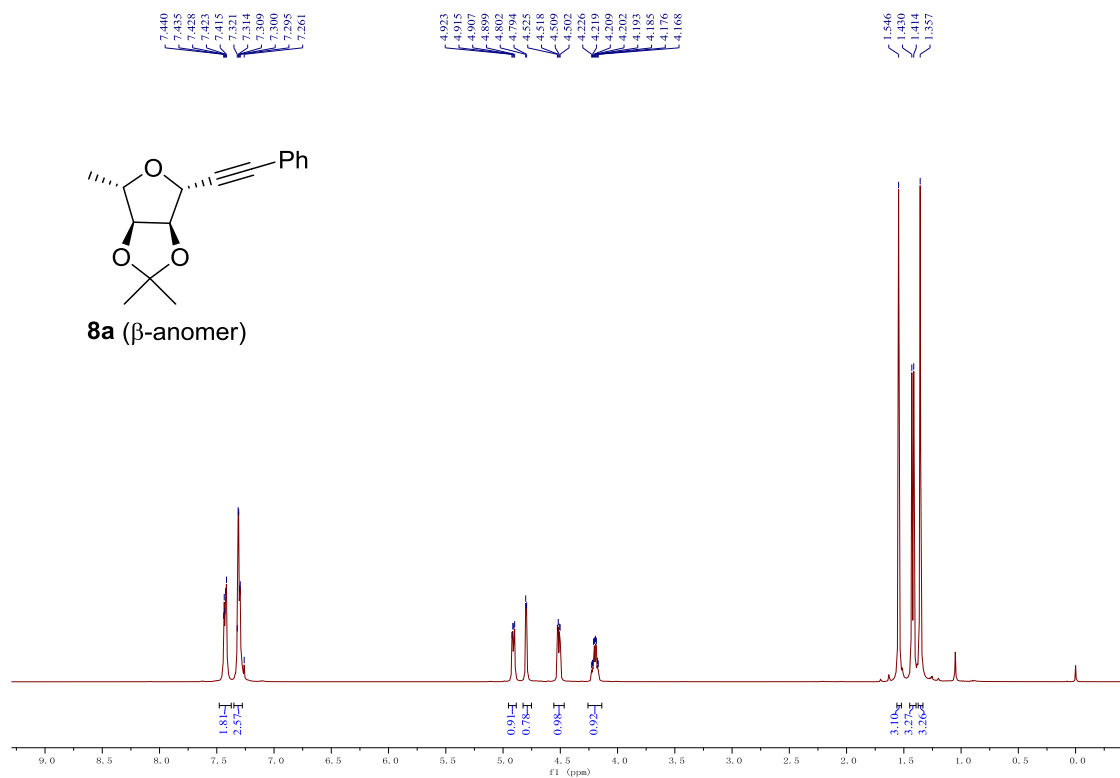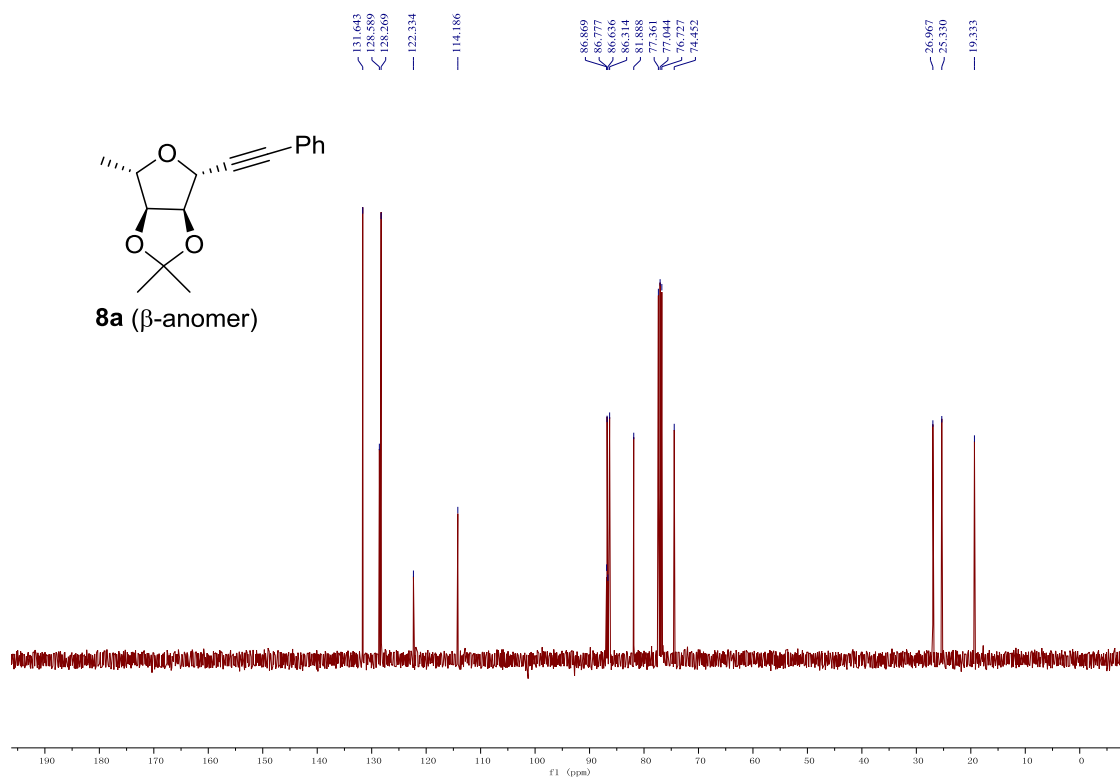

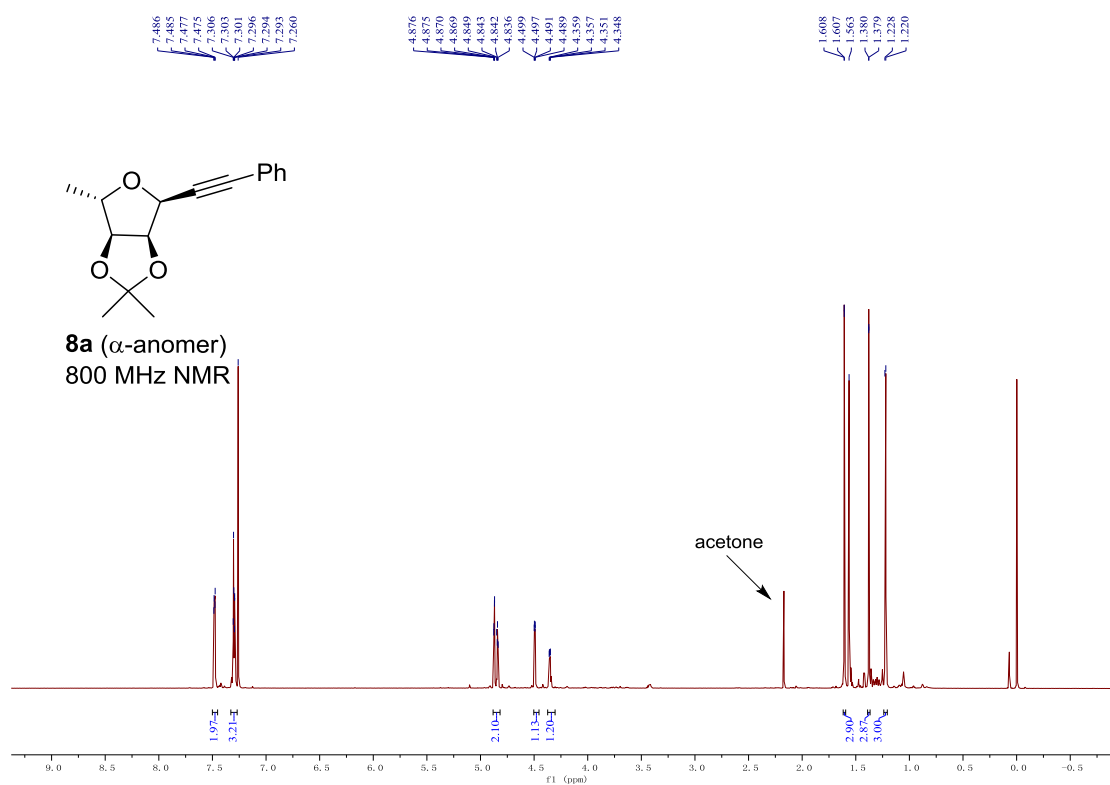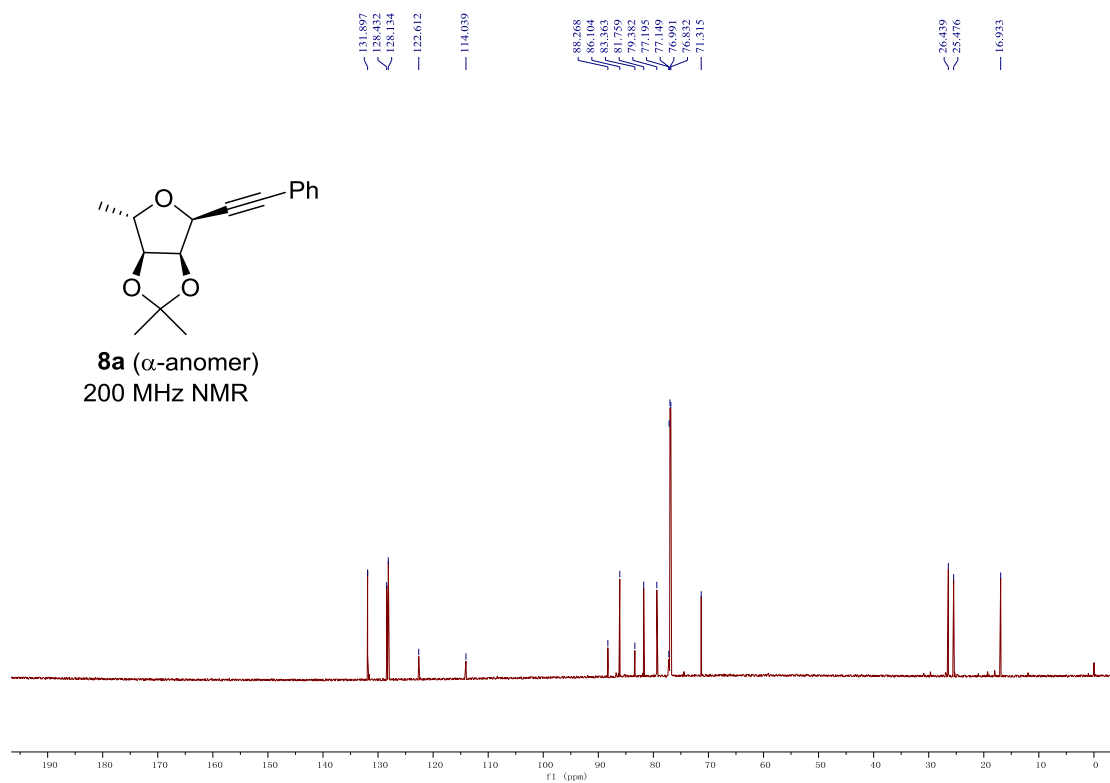

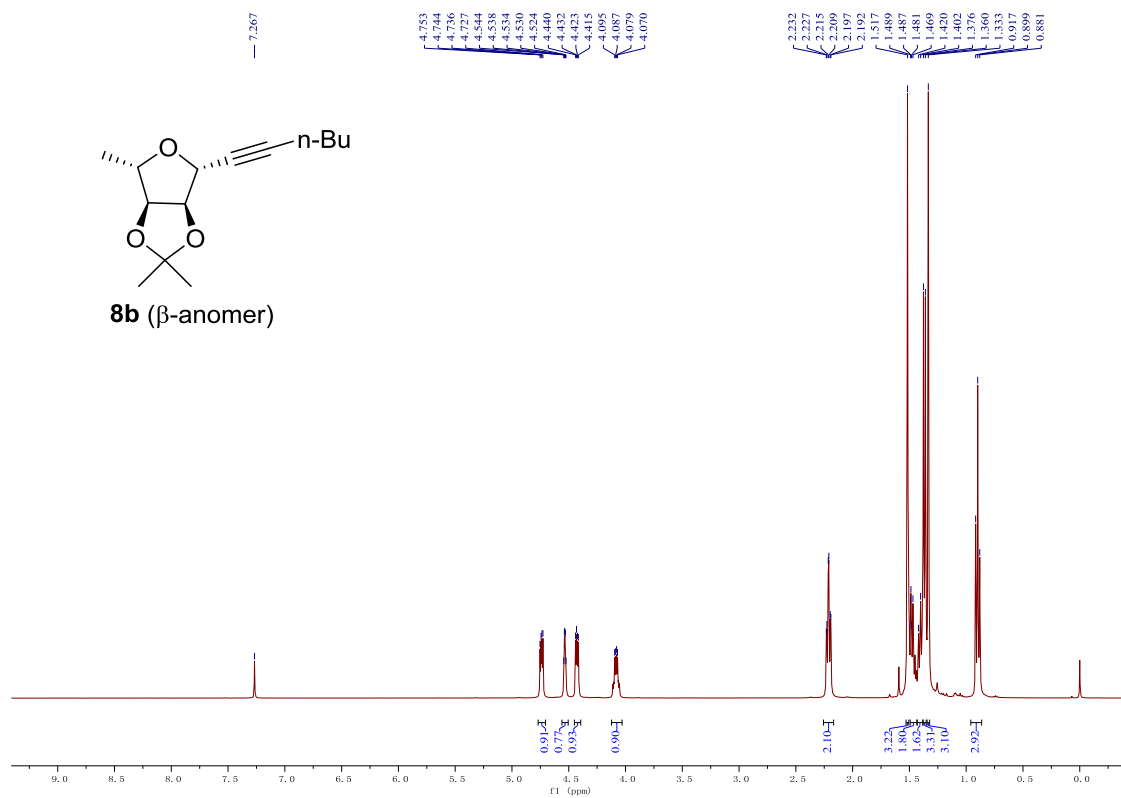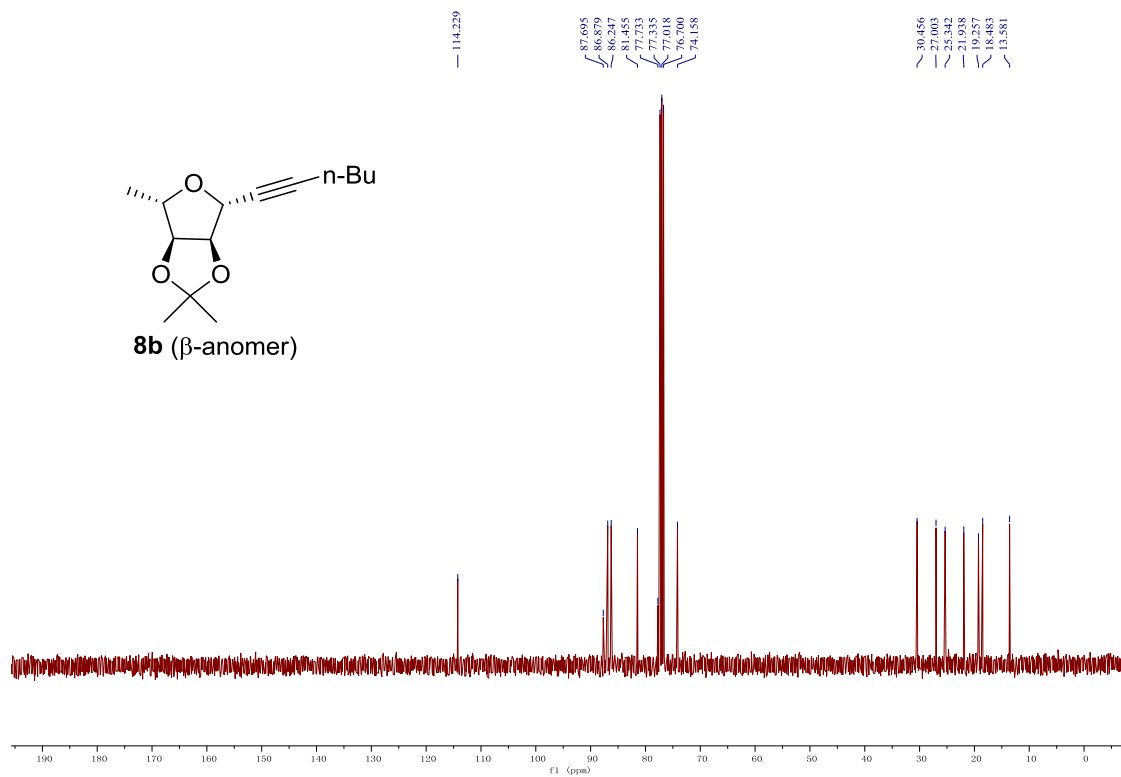

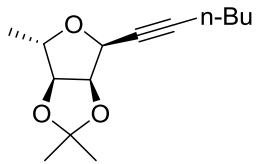

**8b** ( $\alpha$ -anomer)  
800 MHz NMR

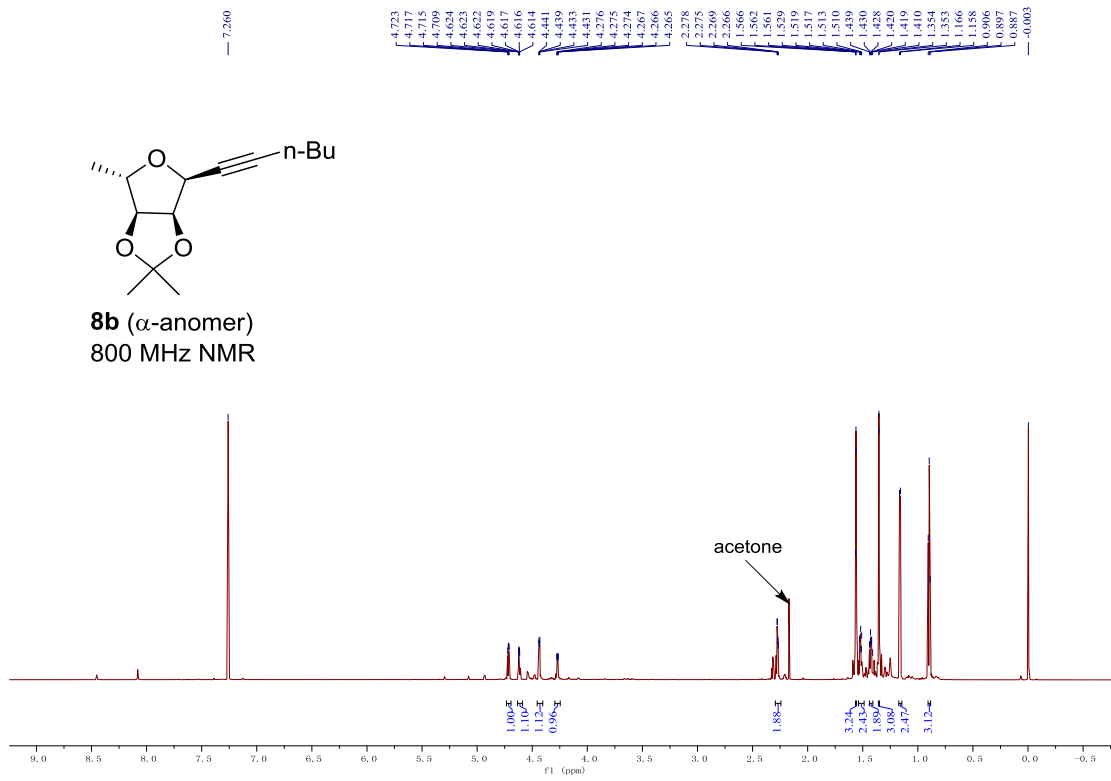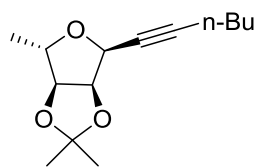

**8b** ( $\alpha$ -anomer)  
200 MHz NMR

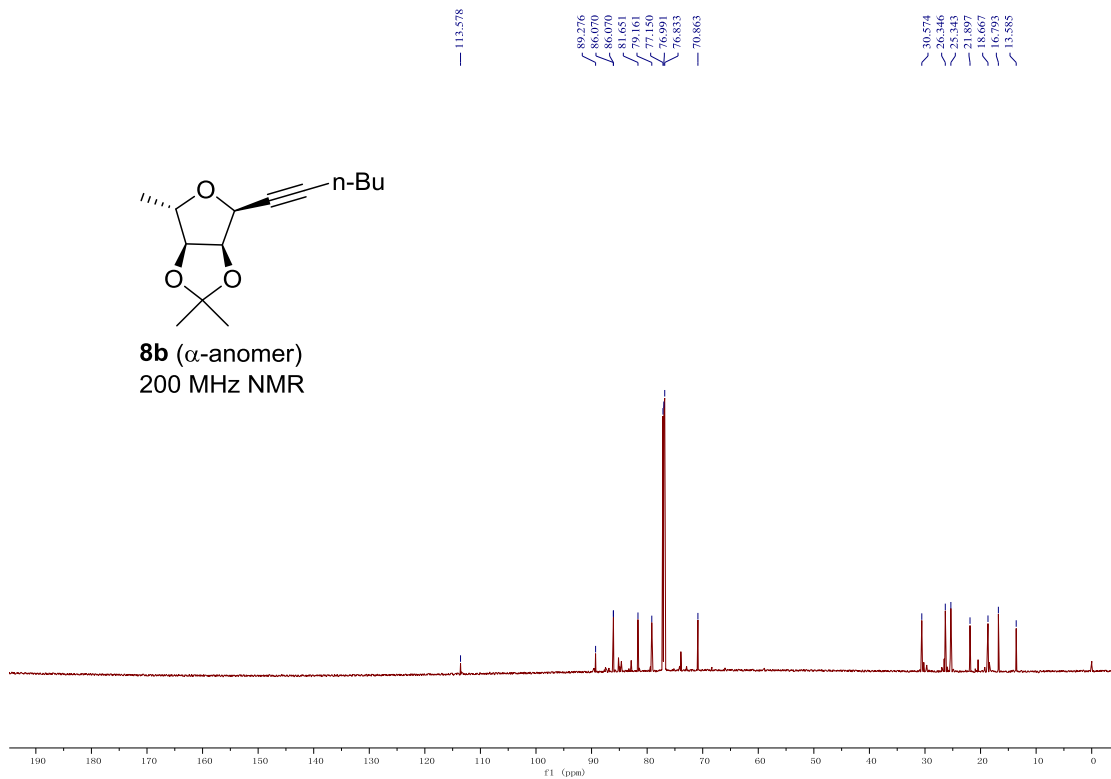

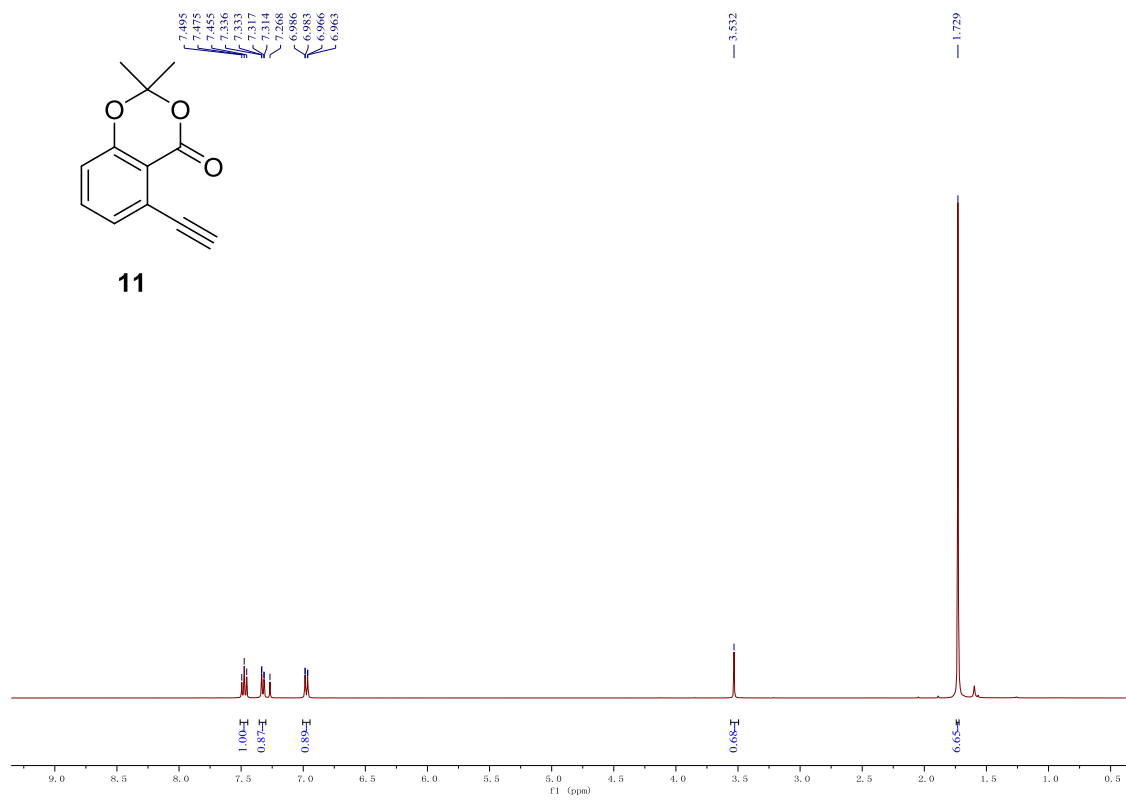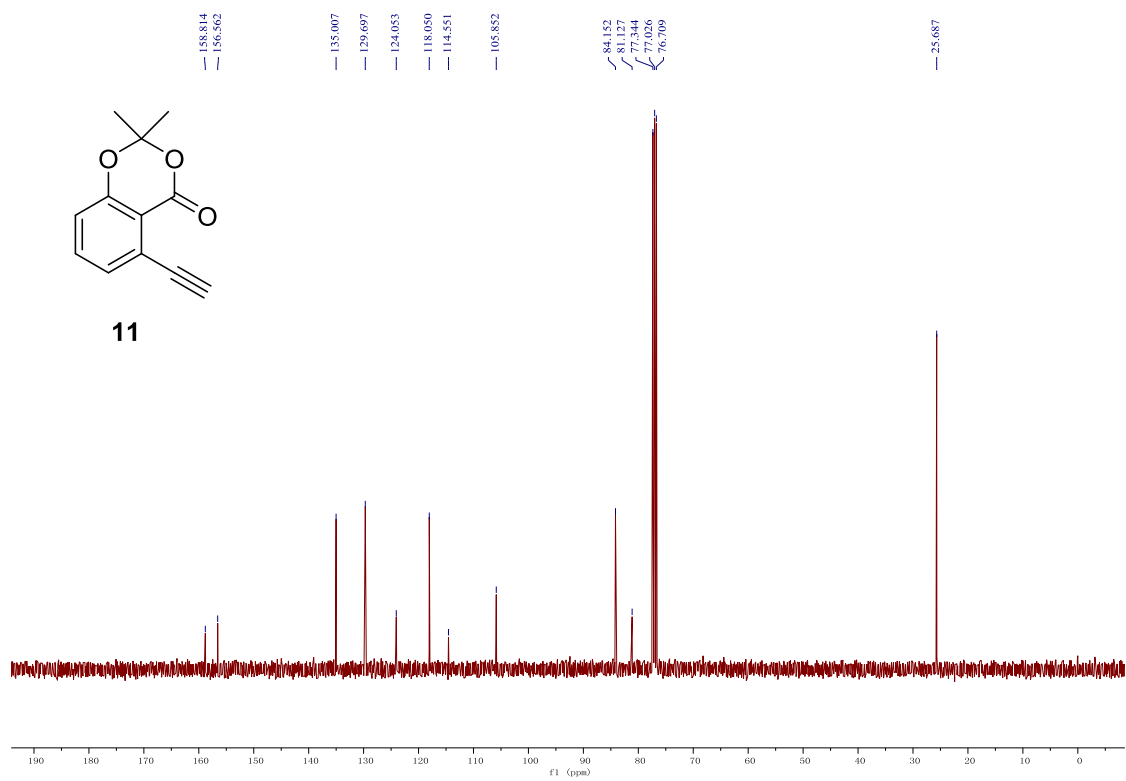



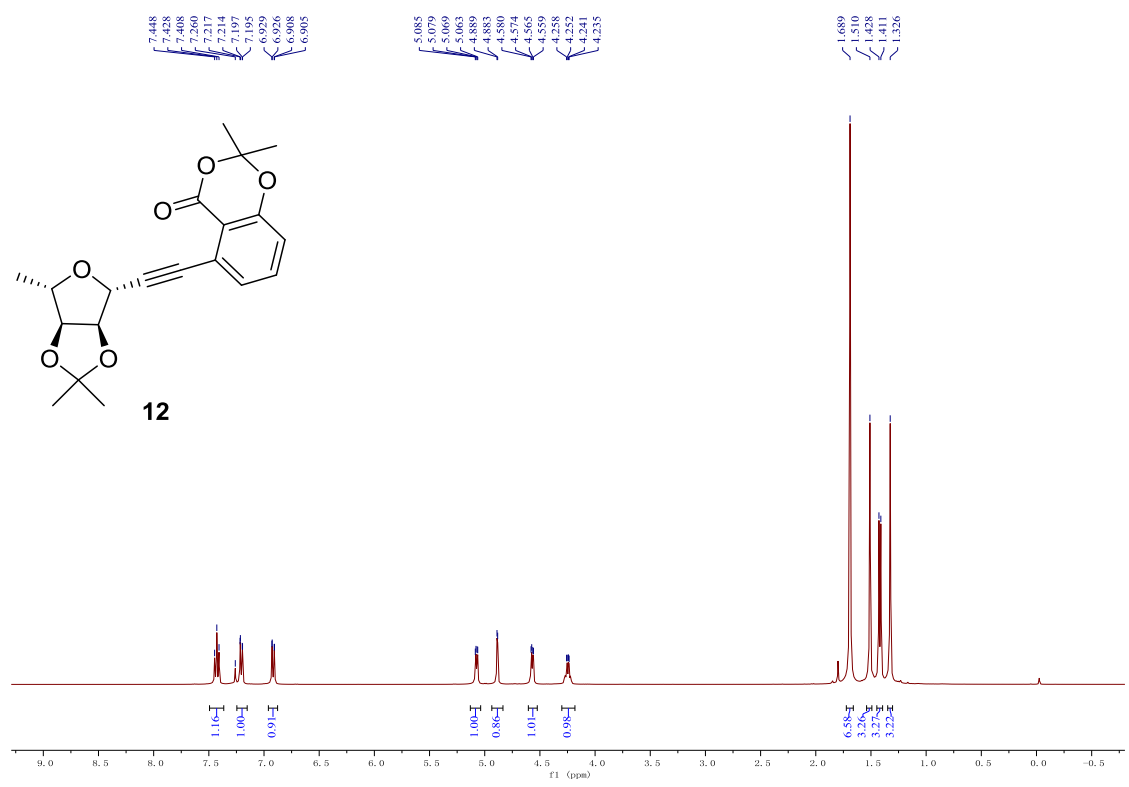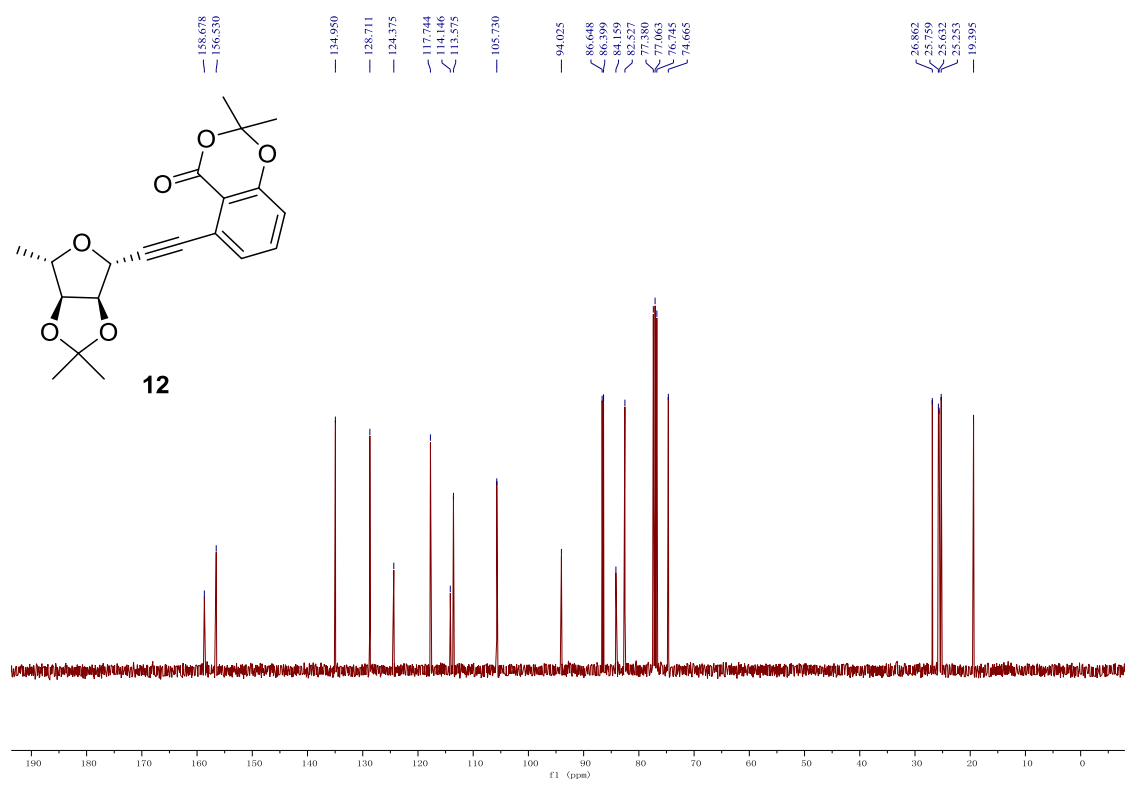

Supplement: c8qo00380g1.pdf [file c8qo00380g1.pdf]
